# Supplementary material for: Common activation mechanism of class A GPCRs
Source: PubMed Central journal article supplement (PMC6954041; doi:10.7554/elife.50279), 2019-12-19
Supplement: elife-50279-fig2-data2.pdf [file elife-50279-fig2-data2.pdf]

Figure 2—Source data 2. Thirty-four residue pairs shown conserved rearrangements of residue contacts upon activation.

**This PDF file includes:**

Auxiliary Supplementary Figs. S1 to S8

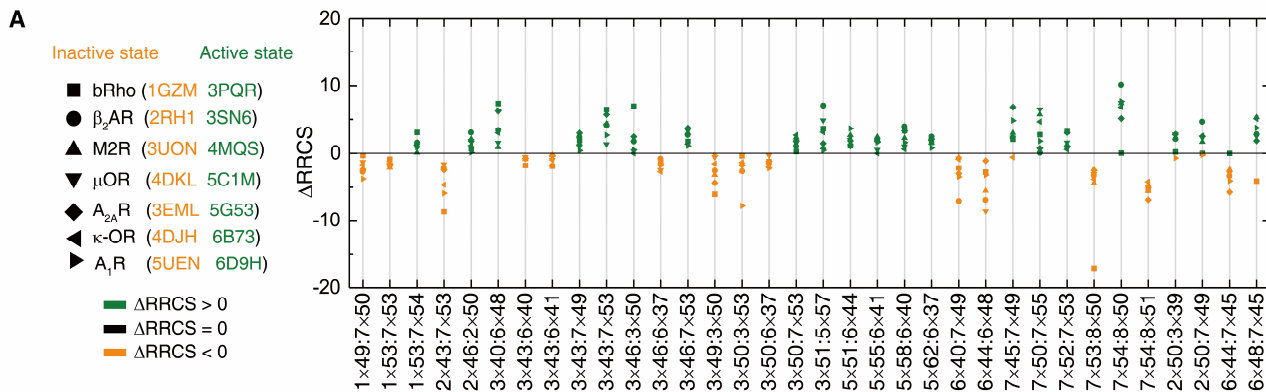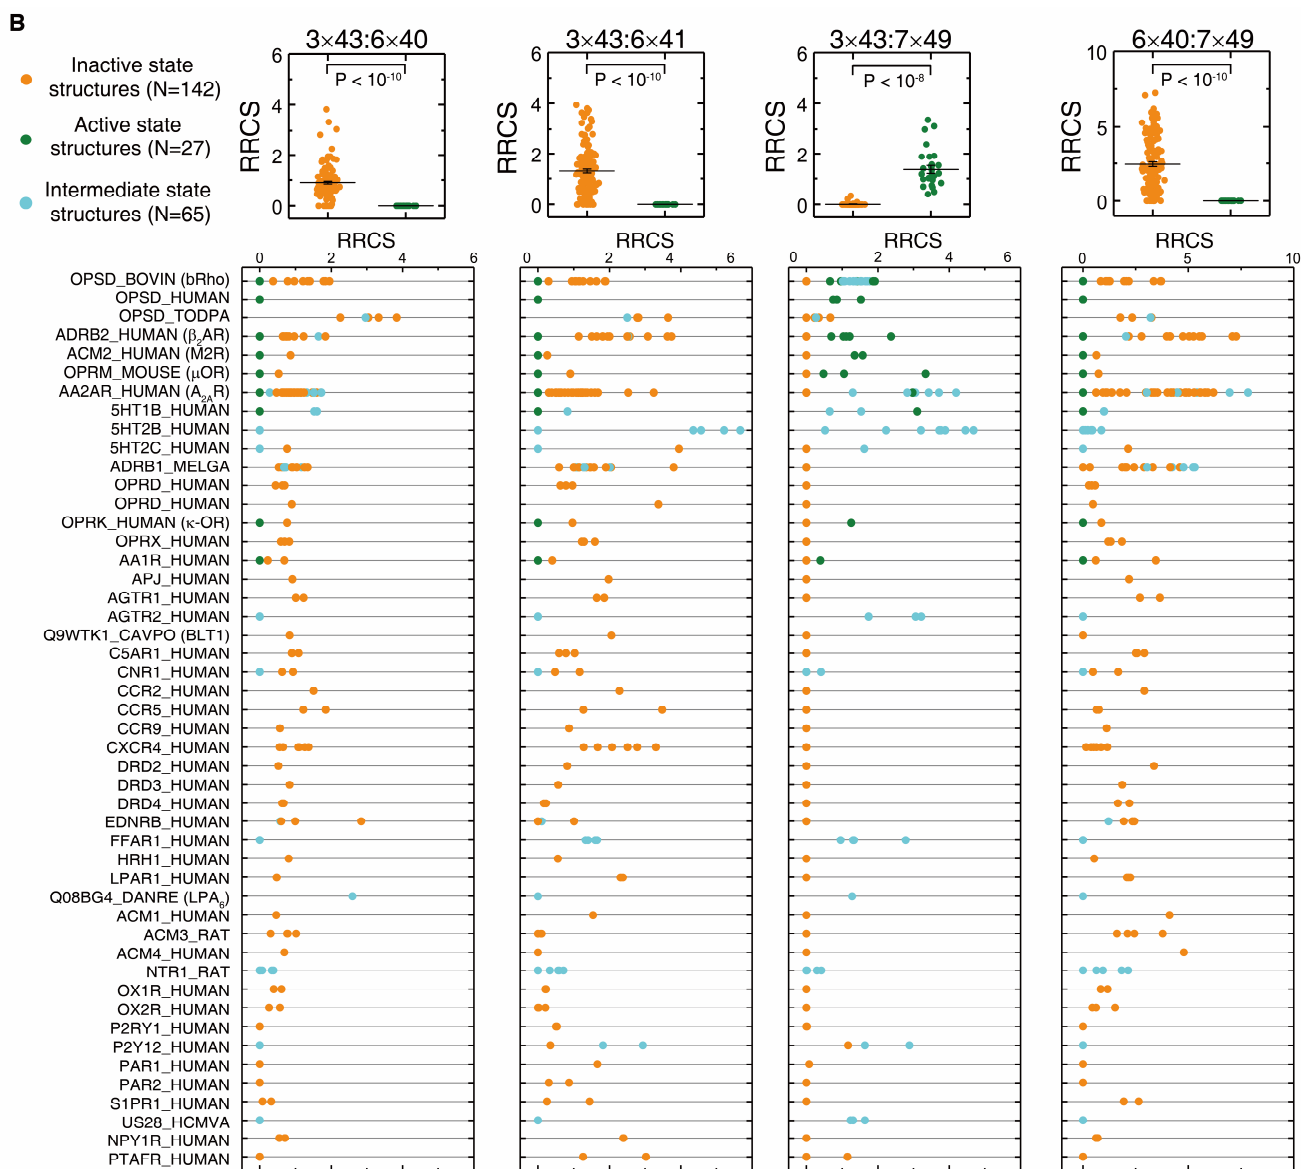

**Fig. S1. Residue pairs with conserved rearrangements of residue contacts upon activation.**

(A) For 7 receptors with both inactive- and active-state structures available (Rho,  $\beta_2$ AR, M2R,  $\mu$ OR,  $A_2$ AR,  $\kappa$ -OR and recently determined  $A_1$ R), 34 intra-receptor residue pairs showed almost identical tendency of  $\Delta$ RRCS upon activation, *i.e.*, their  $\Delta$ RRCS are almost entirely positive or negative. Considering there is no sodium pocket for rhodopsin, four related residue pairs around sodium pocket ( $2 \times 46:2 \times 50$ ,  $2 \times 50:3 \times 39$ ,  $2 \times 50:7 \times 49$  and  $6 \times 44:7 \times 45$ ) were neglected for bRho. (B) Four residue pairs (see Supplementary Figs. 2-8 for the rest 30 residue pairs) have significant different RRCS values between inactive- and active- states, *i.e.*, they evolve similar conformational changes upon receptor activation at the RRCS-level (two-sample *t*-test, error bars represent the standard error of the mean). The comparison of RRCS between inactive- and active-state were plotted in receptor-specific manner for 45 class A GPCRs with determined structures, where inactive, active and intermediate states are coloured in orange, cyan and green, respectively.

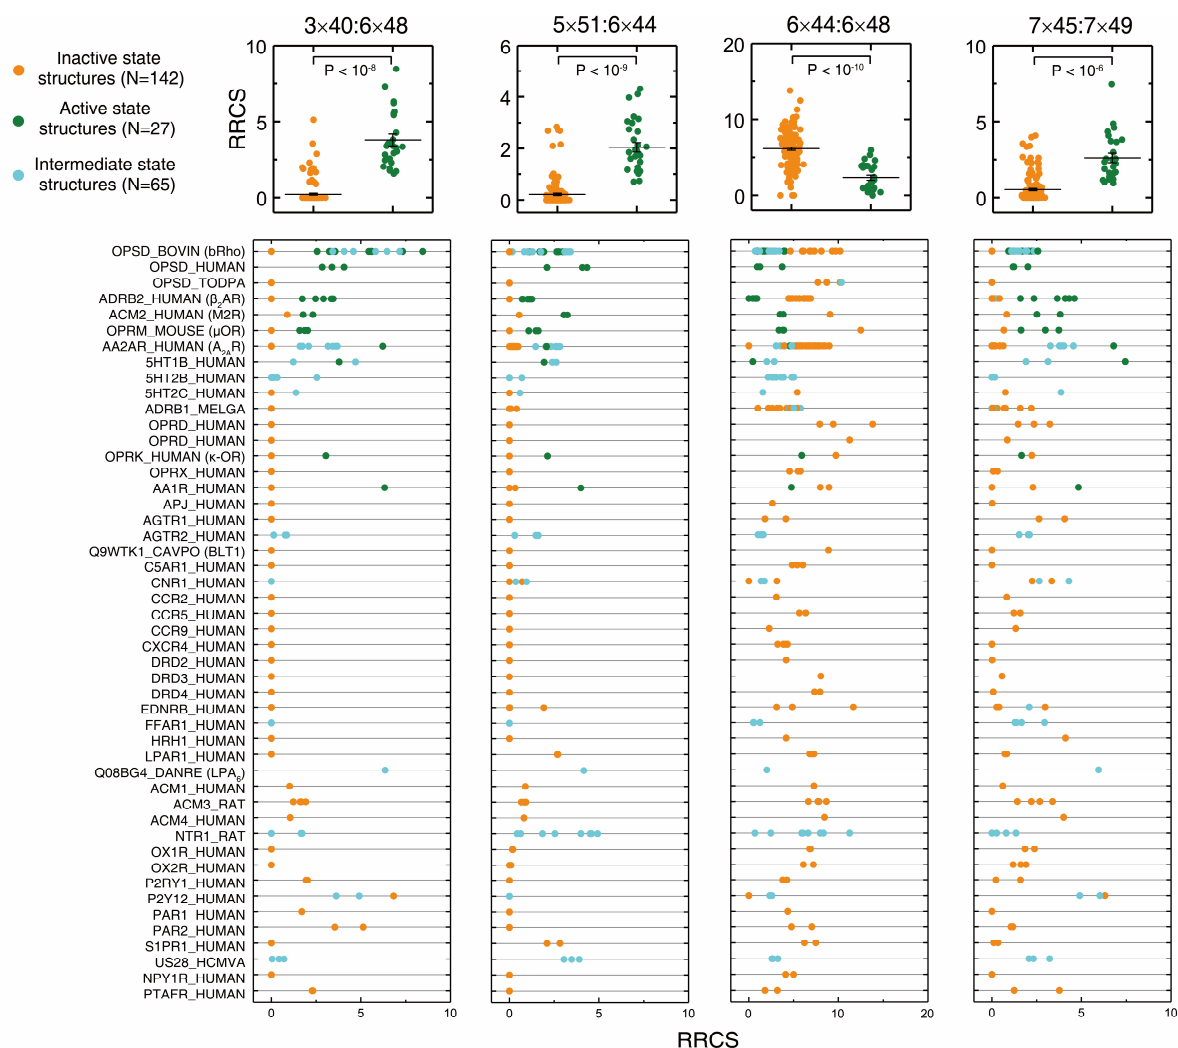

**Fig. S2. Conserved signal initiation step involving changes in residue contacts at the bottom of the ligand-binding pocket.** These residue pairs have significant different RRCS between inactive- and active- states, i.e., they evolve similar rearrangements of residue contacts upon activation (two-sample *t*-test, error bars represent the standard error of the mean). The comparison of RRCS between inactive- and active- state were plotted in receptor-specific manner for 45 class A GPCRs with determined structures, where inactive, active and intermediate states are coloured in orange, cyan and green, respectively.

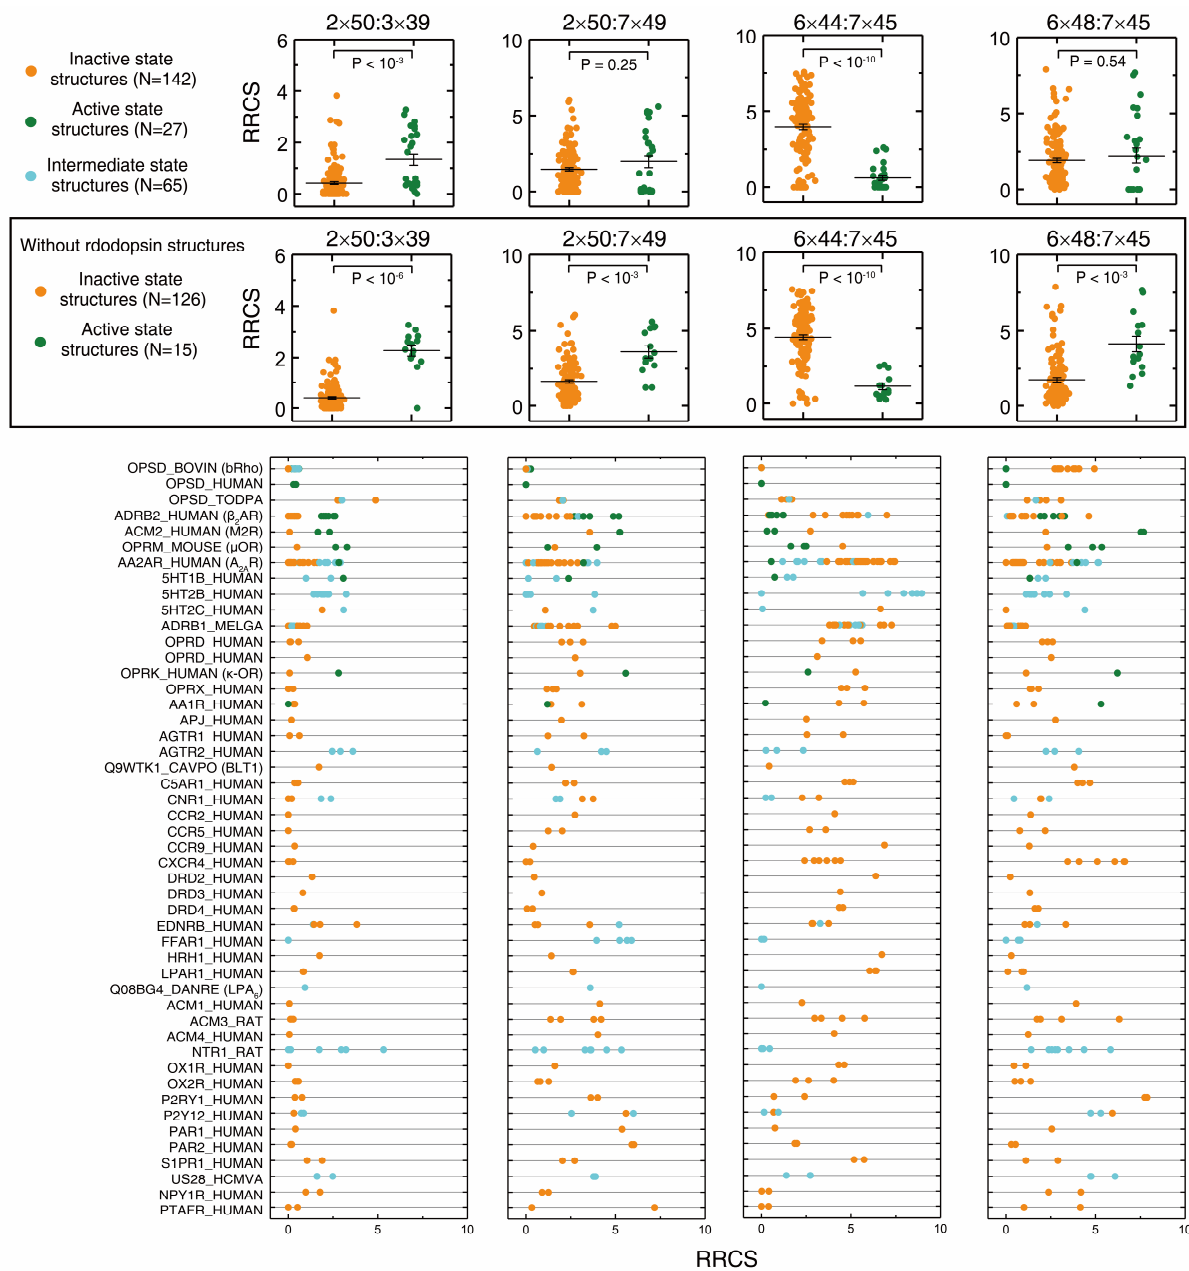

**Fig. S3. Residue pairs around sodium pocket share conserved rearrangements of residue contacts upon activation.** Considering there is no sodium pocket (residues at  $2 \times 50$ ,  $3 \times 39$ ,  $7 \times 45$  and  $7 \times 49$ ) for rhodopsin, four related residue pairs ( $2 \times 46:2 \times 50$ ,  $2 \times 50:3 \times 39$ ,  $2 \times 50:7 \times 49$  and  $6 \times 44:7 \times 45$ ) were omitted for rhodopsin. These residue pairs have significant different RRCS between inactive- and active- state, i.e., they evolve rearrangements of residue contacts upon activation (two-sample *t*-test, error bars represent the standard error of the mean).

The comparison of RRCS between inactive- and active- state were plotted in receptor-specific manner for 45 class A GPCRs with determined structures, where inactive, active and intermediate states are coloured in orange, cyan and green, respectively.

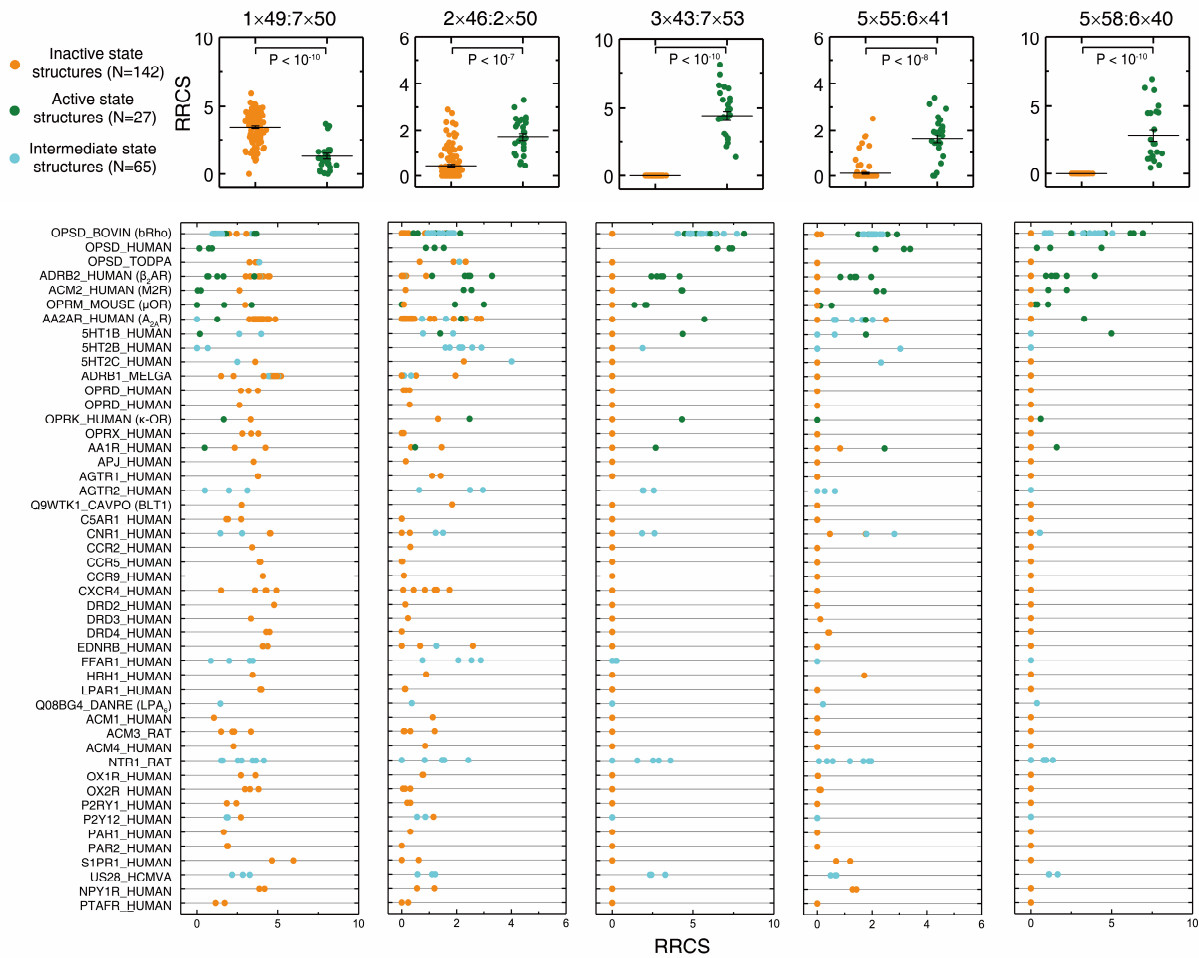

**Fig. S4. Residue pairs around hydrophobic lock (3 × 43, 6 × 40 and 6 × 41) in layer 2 share conserved rearrangements of residue contacts upon activation.** These residue pairs have significant different RRCS between inactive- and active- states, i.e., they evolve rearrangements of residue contacts upon activation (two-sample *t*-test, error bars represent the standard error of the mean). The comparison of RRCS between inactive- and active- state were plotted in receptor-specific manner for 45 class A GPCRs with determined structures, where inactive, active and intermediate states are coloured in orange, cyan and green, respectively.

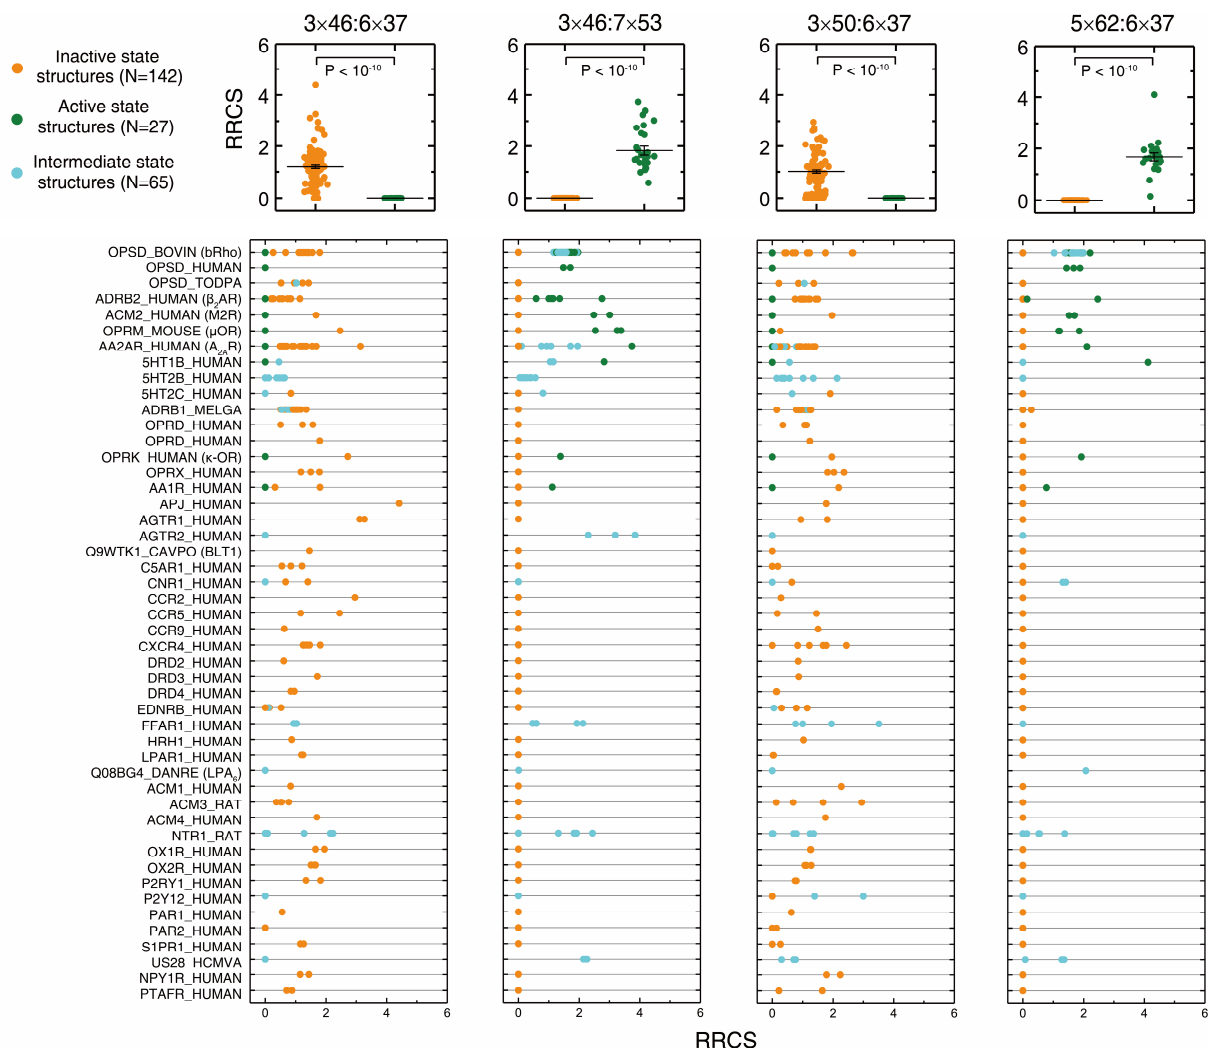

**Fig. S5. Microswitch residues ( $3 \times 46$ ,  $6 \times 37$ ) share conserved rearrangements of residue contacts upon activation.** These residue pairs have significant different RRCS between inactive- and active- state, i.e., they evolve similar rearrangements of residue contacts upon activation (two-sample *t*-test, error bars represent the standard error of the mean). The comparison of RRCS between inactive- and active- state were plotted in receptor-specific manner for 45 class A GPCRs with determined structures, where inactive, active and intermediate states are coloured in orange, cyan and green, respectively.



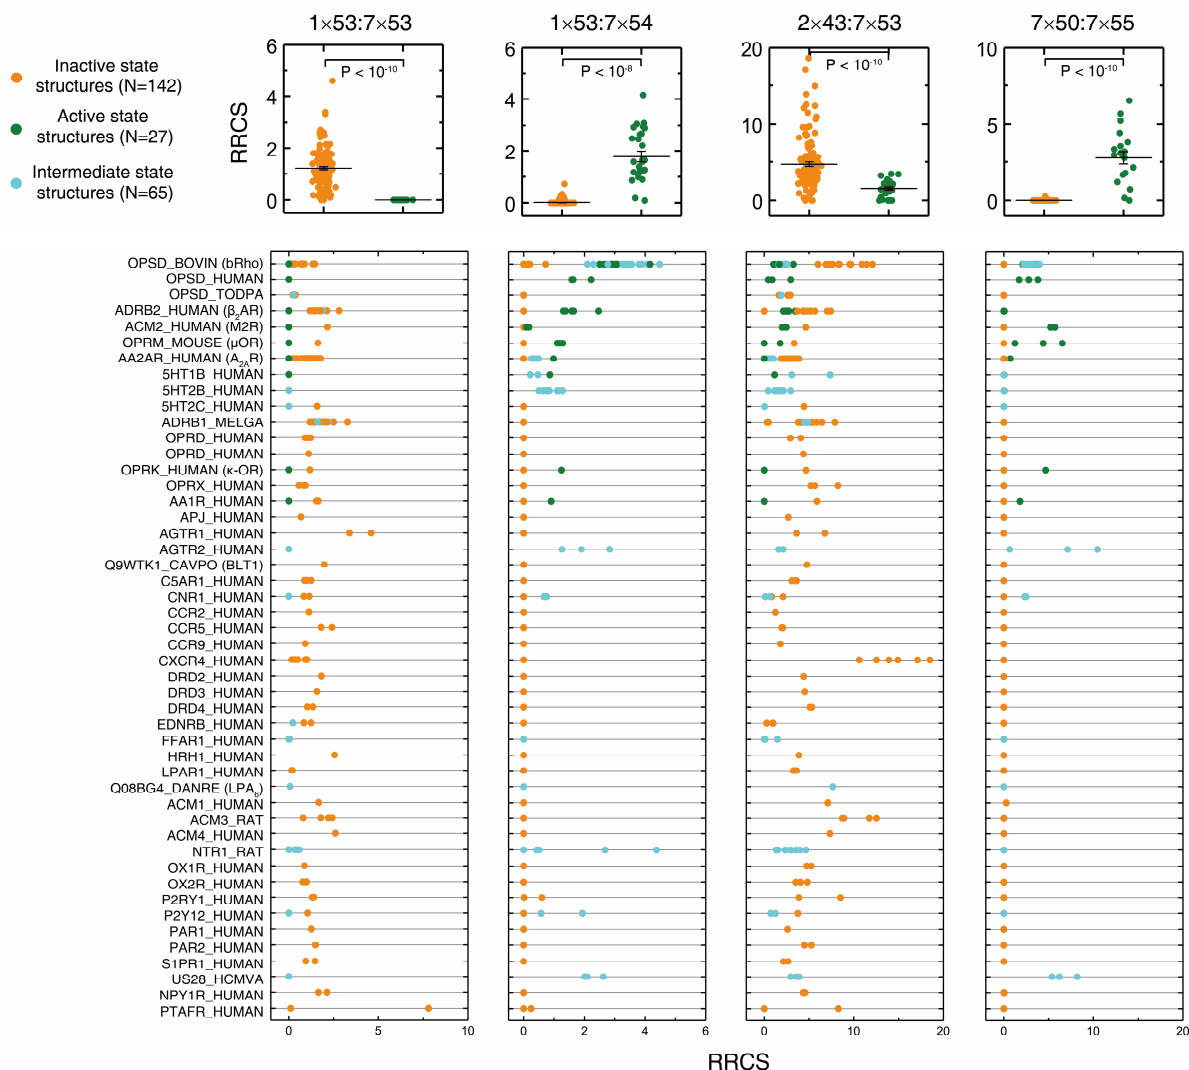

**Fig. S6. Translocation of Y<sup>7x53</sup> during receptor activation.** These residue pairs around Y<sup>7x53</sup> have significant different RRCS between inactive- and active- states, i.e., they evolve similar rearrangements of residue contacts upon activation (two-sample *t*-test, error bars represent the standard error of the mean). The comparison of RRCS between inactive- and active- state were plotted in receptor-specific manner for 45 class A GPCRs with determined structures, where inactive, active and intermediate states are coloured in orange, cyan and green, respectively.

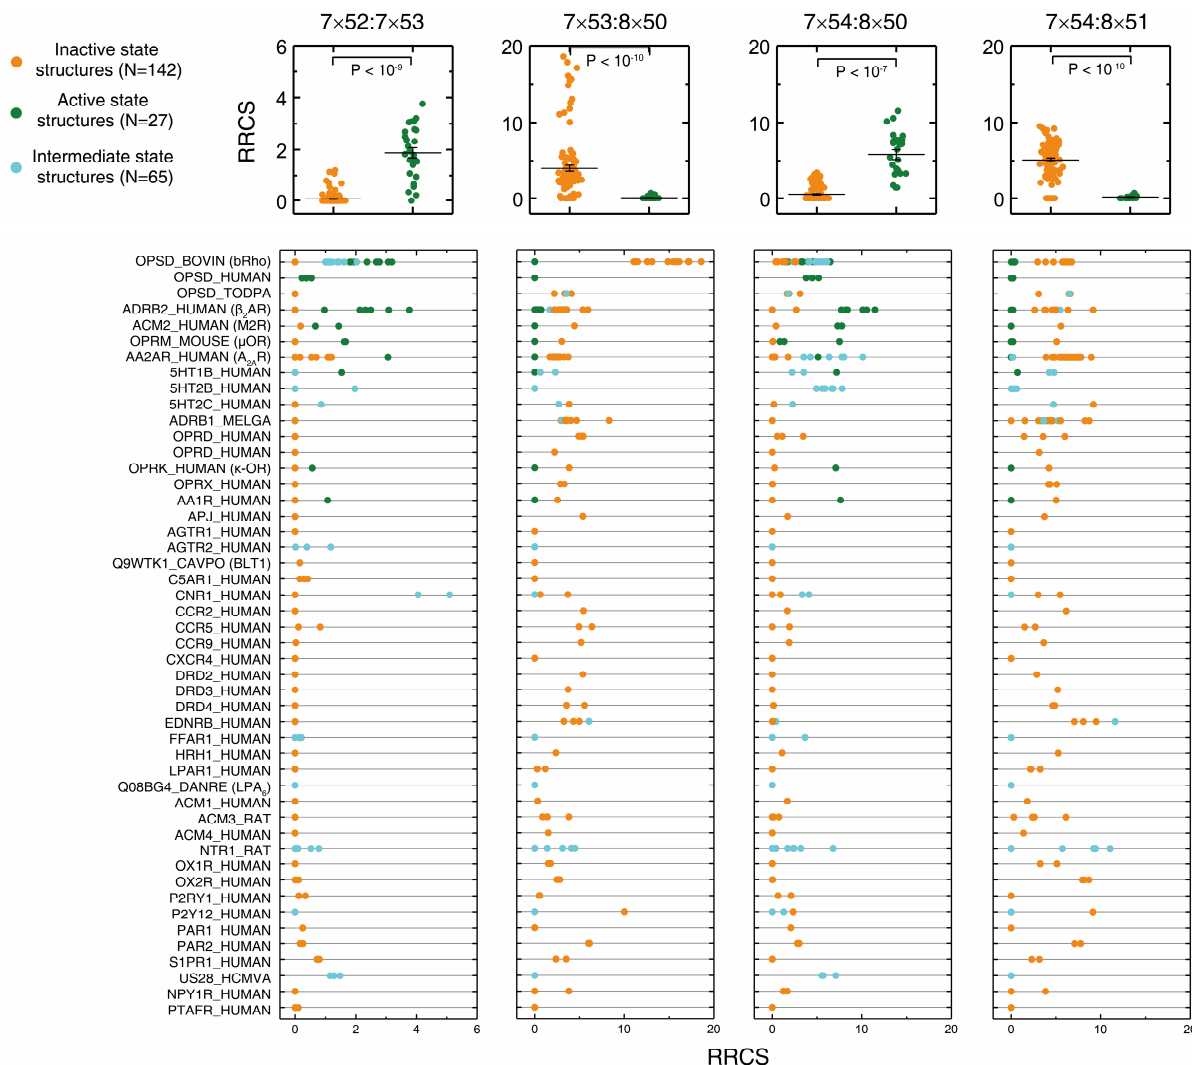

**Fig. S7. Residue pairs around  $Y^{7 \times 53}$  share conserved rearrangements of residue contacts upon activation.** These residue pairs have significant different RRCS between inactive- and active- state, i.e., they evolve similar rearrangements of residue contacts upon activation (two-sample *t*-test, error bars represent the standard error of the mean). The comparison of RRCS between inactive- and active- state were plotted in receptor-specific manner for 45 class A GPCRs with determined structures, where inactive, active and intermediate states are coloured in orange, cyan and green, respectively.

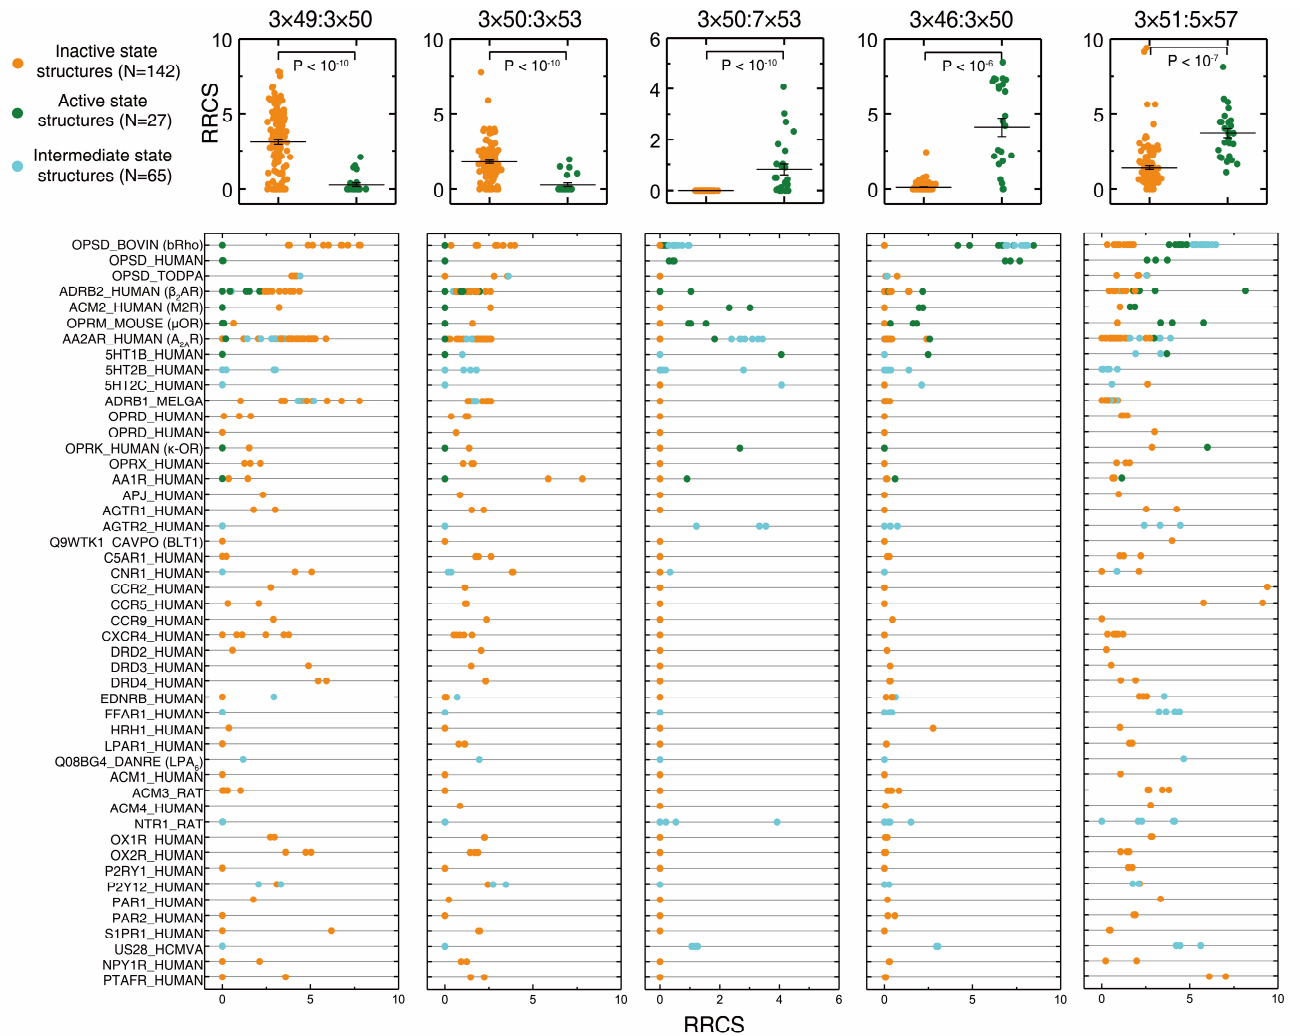

**Fig. S8. Residue pairs around G protein-coupling region share conserved rearrangements of residue contacts upon activation.** These residue pairs have significant different RRCS between inactive- and active- state, i.e., they evolve rearrangements of residue contacts upon activation (two-sample *t*-test, error bars represent the standard error of the mean). The comparison of RRCS between inactive- and active- state were plotted in receptor-specific manner for 45 class A GPCRs with determined structures, where inactive, active and intermediate states are coloured in orange, cyan and green, respectively.
