# Supplementary material for: Common activation mechanism of class A GPCRs
Source: eLife. 2019 Dec 19;8:e50279. doi: 10.7554/eLife.50279 (PMC6954041; doi:10.7554/eLife.50279)
Supplement: Figure 1—source data 1. [file elife-50279-fig1-data1.xlsx]

## Sheet: table1
Figure 1-Soure data 1. The released class A GPCR structures (as of October 1, 2018).
	Receptor	PDB code	Resoultion (Å)	States	X-ray ligand	Mutations introduced in in the construct (Mutations occurred on the universal activation pathway were coloured in red)	Residues with missing atoms (Residue, Number of determined/complete heavy atoms, GPCRdb numbering)
1	OPSD_BOVIN (bRho)	1F88	2.8	Inactive	Retinal (Inverse agonist)	No mutation	No missing atoms
		1GZM	2.7	Inactive	Retinal (Inverse agonist)	No mutation	D330(C-term, 5/8 atoms), D331(C-term, 5/8 atoms), E332(C-term, 1/9 atoms)
		1HZX	2.8	Inactive	Retinal (Inverse agonist)	No mutation	No missing atoms
		1L9H	2.6	Inactive	Retinal (Inverse agonist)	No mutation	No missing atoms
		1U19	2.2	Inactive	Retinal (Inverse agonist)	No mutation	No missing atoms
		2G87	2.6	Inactive	Retinal (Inverse agonist)	No mutation	No missing atoms
		2HPY	2.8	Inactive	Retinal (Inverse agonist)	No mutation	No missing atoms
		2J4Y	3.4	Inactive	Retinal (Inverse agonist)	N2C(N-term), D282C(ECL3)	No missing atoms
		2PED	3	Inactive	Retinal (Inverse agonist)	No mutation	No missing atoms
		3C9L	2.7	Inactive	Retinal (Inverse agonist)	No mutation	D330(C-term, 5/8 atoms), D331(C-term, 5/8 atoms), E332(C-term, 5/9 atoms)
		3C9M	3.4	Inactive	Retinal (Inverse agonist)	N2C(N-term), D282C(ECL3)	No missing atoms
		3OAX	2.6	Inactive	Retinal (Inverse agonist)	No mutation	No missing atoms
		3CAP	2.9	Intermediate	Ligand-free	No mutation	No missing atoms
		3PXO	3	Intermediate	Retinal (agonist)	No mutation	No missing atoms
		4X1H	2.3	Intermediate	C9G (detergent, agonist)	No mutation	No missing atoms
		5DYS	2.3	Intermediate	Ligand-free, T94I (CAM)	N2C(N-term), T94I(2x60), D282C(ECL3)	No missing atoms
		5EN0	2.8	Intermediate	Ligand-free, T94I (CAM)	N2C(N-term), T94I(2x60), D282C(ECL3)	No missing atoms
		5TE3	2.7	Intermediate	B-OCTYLGLUCOSIDE (detergent)	No mutation	No missing atoms
		6FK6	2.36	Intermediate	RS01	N2C(N-term), D282C(ECL3)	No missing atoms
		6FK7	2.62	Intermediate	RS06	N2C(N-term), D282C(ECL3)	No missing atoms
		6FK8	2.87	Intermediate	RS08	N2C(N-term), D282C(ECL3)	No missing atoms
		6FK9	2.63	Intermediate	RS09	N2C(N-term), D282C(ECL3)	No missing atoms
		6FKA	2.7	Intermediate	RS11	N2C(N-term), D282C(ECL3)	No missing atoms
		6FKB	3.03	Intermediate	RS13	N2C(N-term), D282C(ECL3)	No missing atoms
		6FKC	2.46	Intermediate	RS15	N2C(N-term), D282C(ECL3)	No missing atoms
		6FKD	2.49	Intermediate	RS16	N2C(N-term), D282C(ECL3)	No missing atoms
		2X72	3	Active	Retinal (agonist) GaCT peptide	N2C(N-term), E113Q(3x28), D282C(ECL3)	No missing atoms
		3DQB	3.2	Active	Ligand-free GαCT (G protein peptide)	No mutation	No missing atoms
		3PQR	2.9	Active	Retinal (agonist) GαCT2 (G protein peptide)	No mutation	No missing atoms
		4A4M	3.3	Active	Retinal (agonist) N2C, M257Y,D282C (CAM) GαCT (G protein peptide)	N2C(N-term), M257Y(6x40), D282C(ECL3)	No missing atoms
		4BEY	2.9	Active	Ligand-free G90D (CAM) GαCT2 (G protein peptide)	N2C(N-term), G90D(2x56), D282C(ECL3)	No missing atoms
		4BEZ	3.3	Active	ligand-free G90D (CAM)	N2C(N-term), G90D(2x56), D282C(ECL3)	No missing atoms
		4J4Q	2.7	Active	Ligand-free GαCT2 (G protein peptide)	No mutation	No missing atoms
		4PXF	2.8	Active	β-D-octylglucopyranoside (detergent) ArrFL-1 (arrestin fargment)	No mutation	No missing atoms
		5WKT	3.2	Active	B-OCTYLGLUCOSIDE (detergent) GαCT2 (G protein peptide)	No mutation	No missing atoms
1*	OPSD_HUMAN	4ZWJ	3.3	Active	Ligand-free arrestin	N2C(N-term), E113Q(3x28), M257Y(6x40), N282C(ECL3)	No missing atoms
		5W0P	3	Active	Ligand-free arrestin	N2C(N-term), E113Q(3x28), M257Y(6x40), N282C(ECL3)	No missing atoms
		6FUF	3.1	Active	Retinal (agonist) mini-Go	N2C(N-term), M257Y(6x40), N282C(ECL3)	No missing atoms
1**	OPSD_TODPA	2Z73	2.5	Inactive	Retinal (Inverse agonist)	No mutation	No missing atoms
		2ZIY	3.7	Inactive	Retinal (Inverse agonist)	V18I(N-term)	No missing atoms
		3AYN	2.7	Inactive	Retinal (Inverse agonist)	No mutation	No missing atoms
		4WW3	2.8	Inactive	Retinal (Inverse agonist)	No mutation	No missing atoms
		3AYM	2.8	Intermediate	Retinal (agonist)	No mutation	No missing atoms
2	ADRB2_HUMAN (β2AR)	2R4R	3.4	Inactive	Carazolol (inverse agonist)	No mutation	V39(1x38,5/7 atoms), M40(1x39,5/8 atoms), L42(1x41,5/8 atoms), L45(1x44,5/8 atoms), I47(1x46,5/8 atoms), F49(1x48,5/11 atoms), L53(1x52,5/8 atoms), T73(2x44,5/7 atoms), W109(3x28,5/14 atoms), I112(3x31,5/8 atoms), E122(3x41,5/9 atoms), K147(4x39,5/9 atoms), V152(4x44,5/7 atoms), I153(4x45,5/8 atoms), I154(4x46,5/8 atoms), L155(4x47,5/8 atoms), M156(4x48,5/8 atoms), W158(4x50,5/14 atoms), Y209(5x4…
		2R4S	3.4	Inactive	Carazolol (inverse agonist)	No mutation	V39(1x38,5/7 atoms), M40(1x39,5/8 atoms), L42(1x41,5/8 atoms), L45(1x44,5/8 atoms), I47(1x46,5/8 atoms), F49(1x48,5/11 atoms), L53(1x52,5/8 atoms), T73(2x44,5/7 atoms), W109(3x28,5/14 atoms), I112(3x31,5/8 atoms), E122(3x41,5/9 atoms), K147(4x39,5/9 atoms), V152(4x44,5/7 atoms), I153(4x45,5/8 atoms), I154(4x46,5/8 atoms), L155(4x47,5/8 atoms), M156(4x48,5/8 atoms), W158(4x50,5/14 atoms), Y209(5x4…
		2RH1	2.4	Inactive	Carazolol (inverse agonist)	N187E(ECL2)	D29(1x28, 4/8 atoms)
		3D4S	2.8	Inactive	Timolol (partial inverse agonist)	E122W(3x41), N187E(ECL2)	W32(1x31, 13/14 atoms)
		3KJ6	3.4	Inactive	Carazolol (inverse agonist)	G16R(N-term), N187E(ECL2)	M36(1x35,5/8 atoms), V39(1x38,5/7 atoms), L42(1x41,5/8 atoms), F49(1x48,5/11 atoms), L53(1x52,5/8 atoms), I55(1x54,5/8 atoms), R63(12x49,5/11 atoms), N69(2x40,5/8 atoms), C77(2x48,5/6 atoms), I112(3x31,5/8 atoms), V114(3x33,5/7 atoms), S120(3x39,5/6 atoms), E122(3x41,5/9 atoms), R131(3x50,5/11 atoms), K147(4x39,5/9 atoms), M156(4x48,5/8 atoms), Y209(5x48,5/12 atoms), K227(5x66,5/9 atoms), K232(5x…
		3NY8	2.8	Inactive	ICI 118,551 (inverse agonist)	G16R(N-term), E27Q(1x26), E122W(3x41), N187E(ECL2)	W32(1x31, 13/14 atoms)
		3NY9	2.8	Inactive	CHEMBL1233771 (Inverse agonist)	G16R(N-term), E27Q(1x26), E122W(3x41), N187E(ECL2)	K60(1x59,5/9 atoms), M98(23x49,6/8 atoms), T100(23x51,5/7 atoms), E107(3x26,5/9 atoms),K147(4x39,5/9 atoms), R221(5x60,5/11 atoms), Q299(6x61,5/9 atoms), R304(7x30,7/11 atoms), E306(7x32,5/9 atoms),
		3NYA	3.2	Inactive	Alprenolol (antagonist)	G16R(N-term), E27Q(1x26), E122W(3x41), N187E(ECL2)	W32(1x31, 13/14 atoms)
		5D5A	2.5	Inactive	Carazolol (inverse agonist)	G16R(N-term), E27Q(1x26), N187E(ECL2)	No missing atoms
		5D6L	3.2	Inactive	Carazolol (inverse agonist)	G16R(N-term), E27Q(1x26), N187E(ECL2), M230L(5x69)	D29(1x28, 5/8 atoms)
		5JQH	3.2	Inactive	Carazolol (inverse agonist) Nb60 (inactive-state stabilizing nanobody)	M96T(M2x66), M98T(23x49), N187E(ECL2), S261I(ICL3), S262D(6x24), C265A(6x27)	K60(1x59,5/9 atoms), E107(3x26,5/9 atoms), K140(34x52,5/9 atoms), K147(4x39,5/9 atoms), Q224(5x63,5/9 atoms), K227(5x66,5/9 atoms), L230(5x69,5/8 atoms), S262(6x24,5/6 atoms), K263(6x25,5/9 atoms), K270(6x32,5/9 atoms), K273(6x35,5/9 atoms), N301(ECL3,5/8 atoms), E306(7x32,5/9 atoms), E338(8x56,5/9 atoms), R343(C-term,5/11 atoms),
		5X7D	2.7	Inactive	Carazolol (inverse agonist) Cmpd-15 (intracellular allosteric antagonist)	G16R(N-term), E27Q(1x26), N187E(ECL2)	R304(7x30, 5/11 atoms)
		3PDS	3.5	Intermediate	FAUC50 (agonist)	E27Q(1x26), H93C(2x63), N187E(ECL2)	D29(1x28, 4/8 atoms)
		3P0G	3.5	Active	BI-167107 (agonist) Nb80(nanobody)	G16R(N-term), E27Q(1x26), N187E(ECL2)	No missing atoms
		3SN6	3.2	Active	BI-167107 (agonist) Gs (G protein)	M96T(M2x66), M98T(23x49), N187E(ECL2)	R63(12x49,5/11 atoms), K97(ECL1,5/9 atoms), M98(23x49,5/8 atoms), W99(23x50,5/14 atoms), F101(23x52,5/11 atoms), K149(4x41,5/9 atoms), R175(ECL2,5/11 atoms), D192(45x51,5/8 atoms), F193(45x52,5/11 atoms), F194(ECL2,5/11 atoms), T195(ECL2,5/7 atoms), K267(6x29,5/9 atoms), H269(6x31,5/10 atoms), K270(6x32,5/9 atoms), L272(6x34,5/8 atoms), Q299(6x61,5/9 atoms), N301(ECL3,5/8 atoms), L302(ECL3,5/8 at…
		4LDE	2.8	Active	BI167107 (agonist) Nb6B9 (Nanobody)	M96T(2x66), M98T(23x49), N187E(ECL2), C265A(6x27)	K60(1x59,5/9 atoms)E62(12x48,5/9 atoms), K149(4x41,5/9 atoms), F223(5x62,5/11 atoms), Q224(5x63,5/9 atoms), Q231(5x70,5/9 atoms), K263(6x25,5/9 atoms), F264(6x26,5/11 atoms), K270(6x32,5/9 atoms),
		4LDL	3.1	Active	Hydroxybenzylisoproterenol (agonist) Nb6B9 (Nanobody)	M96T(2x66), M98T(23x49), N187E(ECL2), C265A(6x27)	K60(1x59,5/9 atoms), E62(12x48,5/9 atoms), R63(12x49,5/11 atoms)K149(4x41,5/9 atoms), F223(5x62,5/11 atoms), Q224(5x63,5/9 atoms), K227(5x66,5/9 atoms), Q231(5x70,5/9 atoms), K263(6x25,5/9 atoms), F264(6x26,5/11 atoms), L266(6x28,5/8 atoms), K270(6x32,5/9 atoms), Q299(6x61,6/9 atoms),
		4LDO	3.2	Active	Adrenaline (agonist) Nb6B9 (Nanobody)	M96T(2x66), M98T(23x49), N187E(ECL2), C265A(6x27)	K60(1x59,5/9 atoms), E62(12x48,5/9 atoms), R63(12x49,5/11 atoms), K149(4x41,5/9 atoms), F223(5x62,5/11 atoms), K227(5x66,5/9 atoms), Q231(5x70,5/9 atoms), K263(6x25,5/9 atoms), F264(6x26,6/11 atoms), L266(6x28,5/8 atoms), K270(6x32,5/9 atoms), L302(ECL3,5/8 atoms),
		4QKX	3.3	Active	35V (agonist) Nb6B9 (nanobody)	H83C(2x63), M96T(2x66), M98T(23x49), N187E(ECL2), C265A(6x27)	K60(1x59,5/9 atoms), E62(12x48,5/9 atoms), R63(12x49,5/11 atoms), K149(4x41,5/9 atoms), F223(5x62,5/11 atoms), K227(5x66,5/9 atoms), Q231(5x70,5/9 atoms), K263(6x25,5/9 atoms), L266(6x28,5/8 atoms), K270(6x32,5/9 atoms), L302(ECL3,5/8 atoms),
3	ACM2_HUMAN (M2R)	3UON	3	Inactive	3-quinuclidinyl-benzilate (antagonist)	N2D(N-term), N3D(N-term), N6D(N-term), N9D(N-term)	R216(5x68, 5/11 atoms)
		4MQS	3.5	Active	Iperoxo (agonist) Nb9-8 (Nanobody)	N0D, N1D(N-term), N4D(N-term), N7D(N-term), A373T(ICL3), K374R(ICL3)	R52(12x48,5/11 atoms), H53(12x49,5/10 atoms), K127(3x56,5/9 atoms), K134(34x56,5/9 atoms), K138(4x40,5/9 atoms), I165(4x67,5/8 atoms), D173(ECL2,5/8 atoms), E175(ECL2,5/9 atoms), K214(5x66,5/9 atoms), S215(5x67,5/6 atoms), R381(6x29,5/11 atoms), K383(6x31,5/9 atoms), K384(6x32,5/9 atoms), N444(8x47,5/8 atoms), K448(8x51,5/9 atoms), K449(8x52,5/9 atoms), L455(8x58,5/8 atoms)
		4MQT	3.7	Active	Iperoxo (agonist) Nb9-8 (Nanobody) LY2119620 (PAM)	N0D, N1D(N-term), N4D(N-term), N7D(N-term), A373T(ICL3), K374R(ICL3)	F21(1x30,5/11 atoms), R52(12x48,5/11 atoms), K134(34x56,5/9 atoms), K138(4x40,5/9 atoms), M139(4x41,5/8 atoms), I165(4x67,5/8 atoms), D173(ECL2,5/8 atoms), E175(ECL2,5/9 atoms), F181(ECL2,5/11 atoms), K214(5x66,5/9 atoms), R381(6x29,5/11 atoms), E382(6x30,5/9 atoms), K383(6x31,5/9 atoms), K448(8x51,5/9 atoms), K449(8x52,5/9 atoms), M456(8x59,5/8 atoms)
4	OPRM_MOUSE (μOR)	4DKL	2.8	Inactive	β-funaltrexamine (antagonist)	No mutation	T67(1x31,5/7 atoms), K260(5x66,5/9 atoms), R263(ICL3,5/11 atoms), R273(6x28,5/11 atoms), N274(6x29,5/8 atoms), R276(6x31,5/11 atoms), R348(8x55,5/11 atoms), E349(8x56,5/9 atoms)
		5C1M	2.1	Active	BU72 (agonist) Nb39 (nanobody)	No mutation	G52(N-term,3/4 atoms), K269(6x24,5/9 atoms), E270(6x25,5/9 atoms), R273(6x28,5/11 atoms)
		6DDE	3.5	Active	DAMGO (agonist) nucleotide-free Gi	No mutation	M65(5/8 atoms,1x29), V66(5/7 atoms,1x30), T67(5/7 atoms,1x31), I69(5/8 atoms,1x33), T70(5/7 atoms,1x34), I71(5/8 atoms,1x35), L74(5/8 atoms,1x38), C79(5/6 atoms,1x43), V80(5/7 atoms,1x44), L83(5/8 atoms,1x47), I93(5/8 atoms,1x57), R95(5/11 atoms,1x59), K98(5/9 atoms,12x49), K100(5/9 atoms,12x51), N104(5/8 atoms,2x40), T118(5/7 atoms,2x54), S125(5/6 atoms,2x61), L129(5/8 atoms,2x65), M130(5/8 atom…
		6DDF	3.5	Active	DAMGO (agonist) nucleotide-free Gi	No mutation	M65(5/8 atoms,1x29), V66(5/7 atoms,1x30), T67(5/7 atoms,1x31), I69(5/8 atoms,1x33), M72(5/8 atoms,1x36), L74(5/8 atoms,1x38), S76(5/6 atoms,1x40), I77(5/8 atoms,1x41), V80(5/7 atoms,1x44), V81(5/7 atoms,1x45), V94(5/7 atoms,1x58), R95(5/11 atoms,1x59), K100(5/9 atoms,12x51), D114(5/8 atoms,2x50), S119(5/6 atoms,2x55), S125(5/6 atoms,2x61), L129(5/8 atoms,2x65), T132(5/7 atoms,23x49), N137(5/8 ato…
5	AA2AR_HUMAN (A2AR)	3EML	2.6	Inactive	ZM241385 (antagonist)	No mutation	No missing atoms
		3PWH	3.3	Inactive	ZM241385 (antagonist)	A54L(2x52), T88A(3x36), R107A(3x55), K122A(4x43), L202A(5x63), L235A(6x37), V239A(6x41), S277A(7x41)	No missing atoms
		3REY	3.3	Inactive	XAC (antagonist)	A54L(2x52), T88A(3x36), R107A(3x55), K122A(4x43), L202A(5x63), L235A(6x37), V239A(6x41), S277A(7x41)	No missing atoms
		3RFM	3.6	Inactive	Caffeine (antagonist)	A54L(2x52), T88A(3x36), R107A(3x55), K122A(4x43), L202A(5x63), L235A(6x37), V239A(6x41), S277A(7x41)	No missing atoms
		3UZA	3.3	Inactive	CHEMBL2024115 (antagonist)	A54L(2x52), T88A(3x36), R107A(3x55), K122A(4x43), L202A(5x63), L235A(6x37), V239A(6x41), S277A(7x41)	No missing atoms
		3UZC	3.3	Inactive	CHEMBL2024114 (antagonist)	A54L(2x52), T88A(3x36), R107A(3x55), K122A(4x43), L202A(5x63), L235A(6x37), V239A(6x41), S277A(7x41)	No missing atoms
		3VG9	2.7	Inactive	ZM241385 (antagonist)	N154Q(ECL2)	No missing atoms
		3VGA	3.1	Inactive	ZM241385 (antagonist)	N154Q(ECL2)	R220(6x22,5/11 atoms), R222(6x24,5/11 atoms)
		4EIY	1.8	Inactive	ZM241385 (antagonist)	No mutation	Q148(ECL2,7/9 atoms), E161(ECL2,5/9 atoms), R220(6x22,6/11 atoms), R293(8x48,8/11 atoms)
		5IU4	1.7	Inactive	ZM241385 (antagonist)	A54L(2x52), T88A(3x36), R107A(3x55), K122A(4x43), N154Q(ECL2), L202A(5x63), L235A(6x37), V239A(6x41), S277A(7x41), G318A(C-term)	No missing atoms
		5IU7	1.9	Inactive	Compound 12c (agonist)	A54L(2x52), T88A(3x36), R107A(3x55), K122A(4x43), N154Q(ECL2), L202A(5x63), L235A(6x37), V239A(6x41), S277A(7x41), G318A(C-term)	No missing atoms
		5IU8	2	Inactive	Compound 12f (agonist)	A54L(2x52), T88A(3x36), R107A(3x55), K122A(4x43), N154Q(ECL2), L202A(5x63), L235A(6x37), V239A(6x41), S277A(7x41), G318A(C-term)	No missing atoms
		5IUA	2.2	Inactive	Compound 12b (agonist)	A54L(2x52), T88A(3x36), R107A(3x55), K122A(4x43), N154Q(ECL2), L202A(5x63), L235A(6x37), V239A(6x41), S277A(7x41), G318A(C-term)	No missing atoms
		5IUB	2.1	Inactive	Compound 12x (agonist)	A54L(2x52), T88A(3x36), R107A(3x55), K122A(4x43), N154Q(ECL2), L202A(5x63), L235A(6x37), V239A(6x41), S277A(7x41), G318A(C-term)	No missing atoms
		5JTB	2.8	Inactive	ZM241385 (antagonist)	No mutation	No missing atoms
		5K2A	2.5	Inactive	ZM241385 (antagonist)	No mutation	I10(1x36,7/8 atoms), R107(3x55,8/11 atoms), R111(34x52,6/11 atoms), Q148(ECL2,6/9 atoms), E161(ECL2,5/9 atoms), R199(5x60,6/11 atoms), R206(5x67,6/11 atoms), R220(6x22,6/11 atoms), R222(6x24,7/11 atoms), K227(6x29,7/9 atoms), K301(8x56,7/9 atoms), V307(8x62,5/7 atoms)
		5K2B	2.5	Inactive	ZM241385 (antagonist)	No mutation	R107(3x55,8/11 atoms), R111(34x52,6/11 atoms), Q148(ECL2,5/9 atoms), E151(ECL2,7/9 atoms), E161(ECL2,5/9 atoms), R199(5x60,6/11 atoms), R206(5x67,6/11 atoms), R222(6x24,7/11 atoms), K227(6x29,7/9 atoms), K301(8x56,7/9 atoms)
		5K2C	1.9	Inactive	ZM241385 (antagonist)	No mutation	R107(3x55,8/11 atoms), Q148(ECL2,6/9 atoms), E161(ECL2,5/9 atoms), R199(5x60,7/11 atoms), R220(6x22,6/11 atoms), R222(6x24,7/11 atoms), Q226(6x28,6/9 atoms), K227(6x29,7/9 atoms), K301(8x56,7/9 atoms), V307(8x62,5/7 atoms)
		5K2D	1.9	Inactive	ZM241385 (antagonist)	No mutation	R107(3x55,8/11 atoms), Q148(ECL2,6/9 atoms), E151(ECL2,7/9 atoms), E161(ECL2,5/9 atoms), R199(5x60,7/11 atoms), R222(6x24,7/11 atoms), K227(6x29,7/9 atoms), K301(8x56,7/9 atoms), V307(8x62,5/7 atoms)
		5MZJ	2	Inactive	Theophylline (antagonist)	A54L(2x52), T88A(3x36), R107A(3x55), K122A(4x43), N154Q(ECL2), L202A(5x63), L235A(6x37), V239A(6x41), S277A(7x41), G318A(C-term)	No missing atoms
		5MZP	2.1	Inactive	Caffeine (antagonist)	A54L(2x52), T88A(3x36), R107A(3x55), K122A(4x43), N154Q(ECL2), L202A(5x63), L235A(6x37), V239A(6x41), S277A(7x41)	No missing atoms
		5N2R	2.8	Inactive	PSB36 (antagonist)	A54L(2x52), T88A(3x36), R107A(3x55), K122A(4x43), N154Q(ECL2), L202A(5x63), L235A(6x37), V239A(6x41), S277A(7x41), G318A(C-term)	No missing atoms
		5NLX	2.1	Inactive	ZM241385 (antagonist)	A54L(2x52), T88A(3x36), R107A(3x55), K122A(4x43), N154Q(ECL2), L202A(5x63), L235A(6x37), V239A(6x41), S277A(7x41)	R120(4x41,5/11 atoms), I124(4x45,5/8 atoms), Q157(ECL2,5/9 atoms), D170(ECL2,5/8 atoms), A221(6x23,5/5 atoms), L225(6x27,5/8 atoms), V229(6x31,5/7 atoms), I238(6x40,5/8 atoms), V239(6x41,5/7 atoms), L244(6x46,5/8 atoms), N280(7x45,5/8 atoms), R293(8x48,5/11 atoms), E294(8x49,5/9 atoms), Q297(8x52,5/9 atoms), T298(8x53,5/7 atoms), Q310(8x65,5/9 atoms), E312(8x67,5/9 atoms), E332(C-term,5/9 atoms),…
		5NM2	2	Inactive	ZM241385 (antagonist)	A54L(2x52), T88A(3x36), R107A(3x55), K122A(4x43), N154Q(ECL2), L202A(5x63), L235A(6x37), V239A(6x41), S277A(7x41)	No missing atoms
		5NM4	1.7	Inactive	ZM241385 (antagonist)	A54L(2x52), T88A(3x36), R107A(3x55), K122A(4x43), N154Q(ECL2), L202A(5x63), L235A(6x37), V239A(6x41), S277A(7x41)	R120(4x41,5/11 atoms), I124(4x45,5/8 atoms), Q157(ECL2,5/9 atoms), D170(ECL2,5/8 atoms), A221(6x23,5/5 atoms), E332(C-term,5/9 atoms), L338(C-term,5/8 atoms), A405(C-term,5/5 atoms), Q406(C-term,5/9 atoms)
		5OLG	1.87	Inactive	ZM241385 (antagonist)	A54L(2x52), T88A(3x36), R107A(3x55), K122A(4x43), N154Q(ECL2), L202A(5x63), L235A(6x37), V239A(6x41), S277A(7x41)	No missing atoms
		5OLH	2.6	Inactive	Vipadenant (antagonist)	A54L(2x52), T88A(3x36), R107A(3x55), K122A(4x43), N154Q(ECL2), L202A(5x63), L235A(6x37), V239A(6x41), S277A(7x41)	No missing atoms
		5OLO	3.1	Inactive	Tozadenant (antagonist)	A54L(2x52), T88A(3x36), R107A(3x55), K122A(4x43), N154Q(ECL2), L202A(5x63), L235A(6x37), V239A(6x41), S277A(7x41)	No missing atoms
		5OLV	1.998	Inactive	LUAA47070 (antagonist)	A54L(2x52), T88A(3x36), R107A(3x55), K122A(4x43), N154Q(ECL2), L202A(5x63), L235A(6x37), V239A(6x41), S277A(7x41)	No missing atoms
		5OLZ	1.9	Inactive	Compound 4e (antagonist)	A54L(2x52), T88A(3x36), R107A(3x55), K122A(4x43), N154Q(ECL2), L202A(5x63), L235A(6x37), V239A(6x41), S277A(7x41)	No missing atoms
		5OM1	2.1	Inactive	Compound 4e (antagonist)	A54L(2x52), T88A(3x36), R107A(3x55), K122A(4x43), N154Q(ECL2), L202A(5x63), L235A(6x37), V239A(6x41), S277A(7x41)	No missing atoms
		5OM4	2	Inactive	Compound 4e (antagonist)	A54L(2x52), T88A(3x36), R107A(3x55), K122A(4x43), N154Q(ECL2), L202A(5x63), L235A(6x37), V239A(6x41), S277A(7x41)	No missing atoms
		5UIG	3.5	Inactive	Cmpd-1 (antagonist)	No mutation	V55(2x53,5/7 atoms), H75(3x23,5/10 atoms), L78(3x26,5/8 atoms), I92(3x40,5/8 atoms), I104(3x52,5/8 atoms), R111(34x52,5/11 atoms), L115(34x56,5/8 atoms), T117(ICL2,5/7 atoms), R120(4x41,5/11 atoms), I124(4x45,5/8 atoms), I127(4x48,5/8 atoms), L137(4x58,5/8 atoms), L141(4x62,5/8 atoms), Q148(ECL2,5/9 atoms), E161(ECL2,5/9 atoms), R205(5x66,5/11 atoms), R220(6x22,5/11 atoms), S223(6x25,5/6 atoms), …
		5UVI	3.2	Inactive	ZM241385 (antagonist)	No mutation	R111(34x52,6/11 atoms), Q148(ECL2,5/9 atoms), E151(ECL2,5/9 atoms), E161(ECL2,5/9 atoms), R206(5x67,6/11 atoms), R222(6x24,7/11 atoms), K227(6x29,5/9 atoms), K301(8x56,5/9 atoms)
		5VRA	2.35	Inactive	ZM241385 (antagonist)	No mutation	Q148(ECL2,7/9 atoms), E161(ECL2,5/9 atoms), R220(6x22,6/11 atoms), R293(8x48,8/11 atoms)
		6AQF	2.51	Inactive	ZM241385 (antagonist)	No mutation	R107(3x55,5/11 atoms), R111(34x52,7/11 atoms), K122(4x43,6/atoms), Q148(ECL2,5/9 atoms), K153(ECL2,5/9 atoms) E161(ECL2,5/9 atoms), R199(5x60,7/11 atoms), R206(5x67,5/11 atoms), E219(6x21,5/9 atoms), R220(6x22,6/11 atoms) R222(6x24,7/11 atoms), K227(6x29,6/9 atoms), K233(6x35,5/9 atoms), D261(ECL3,5/8 atoms), R293(8x48,8/11 atoms)
		5WF5	2.6	Intermediate	UK432097 (agonist)	D52A(2x50)	I3(1x29,5/8 atoms), Q148(ECL2,5/9 atoms), K227(6x29,5/9 atoms), R293(8x48,5/11 atoms), K301(8x56,5/9 atoms)
		5WF6	2.9	Intermediate	UK432097 (agonist)	S91A(3x39)	M4(1x30,5/8 atoms), Y43(2x41,5/12 atoms), R120(4x41,5/11 atoms), L141(4x62,5/8 atoms), V164(ECL2,5/7 atoms) K227(6x29,5/9 atoms), K233(6x35,6/9 atoms), D261(ECL3,5/8 atoms)
		2YDO	3	Intermediate	Adenosine (agonist)	L48A(2x46), A54L(2x52), T65A(2x62), Q89A(3x37), N154A(ECL2)	No missing atoms
		2YDV	2.6	Intermediate	NECA (agonist)	L48A(2x46), A54L(2x52), T65A(2x62), Q89A(3x37), N154A(ECL2)	No missing atoms
		3QAK	2.7	Intermediate	UK-432097 (agonist)	No mutation	No missing atoms
		4UG2	2.6	Intermediate	CGS21680 (agonist)	L48A(2x46), A54L(2x52), T65A(2x62), Q89A(3x37), N154A(ECL2)	R222(6x24, 5/11 atoms), S223(6x25, 5/6 atoms)
		4UHR	2.6	Intermediate	CGS21680 (agonist)	L48A(2x46), A54L(2x52), T65A(2x62), Q89A(3x37), N154A(ECL2)	E219(6x21, 5/9 atoms), L216(ICL3, 5/8 atoms)
		5G53	3.4	Active	NECA (agonist) GαCT2 (G protein peptide)	N154A(ECL2)	R107(3x55,5/11 atoms), E161(ecl2,5/9 atoms), R199(5x60,5/11 atoms), K209(5x70,5/9 atoms), E228(6x30,5/9 atoms), R293(8x48,5/11 atoms), E294(8x49,5/9 atoms)
6	OPRK_HUMAN (κOR)	4DJH	2.9	Inactive	JDTic (antagonist)	I135L(3x29)	I85(1x58,5/8 atoms), T88(12x48,5/7 atoms), K89(12x49,6/9 atoms), K165(34x52,8/9 atoms), L167(34x54,5/8 atoms), F169(34x56,5/11 atoms), K200(ECL2,5/9 atoms), D217(ECL2,5/8 atoms), R257(ICL3,7/11 atoms), L259(ICL3,5/8 atoms), K265(6x26,5/9 atoms), R267(6x28,5/11 atoms), R270(6x31,5/11 atoms), R271(6x32,5/11 atoms), V296(6x57,5/7 atoms), S301(ECL3,5/6 atoms), E335(8x48,5/9 atoms), R342(8x55,5/11 ato…
		6B73	3.1	Active	MP1104 (agonist) Nb39 (nanobody)	I135L(3x29)	I54(N-term,5/8 atoms), R86(1x59,5/11 atoms), K89(12x49,5/9 atoms), K200(ECL2,5/9 atoms), V201(ECL2,5/7 atoms), V207(ECL2,5/7 atoms), D216(ECL2,5/8 atoms), D217(ECL2,5/8 atoms), R257(ICL3,5/11 atoms), S262(6x23,5/6 atoms), R263(6x24,5/11 atoms), K265(6x26,5/9 atoms), R267(6x28,5/11 atoms), R270(6x31,5/11 atoms), R271(6x32,5/11 atoms), E297(6x58,5/9 atoms), S305(7x27,5/6 atoms)
7	5HT1B_HUMAN (5-HT1B)	4IAQ	2.8	Intermediate	Dihydroergotamine (agonist)	L138W(3x41)	I39(N-term,5/8 atoms), M54(1x37,6/8 atoms), R76(1x59,5/11 atoms), R78(12x48,6/11 atoms), R114(23x49,7/11 atoms), K160(34x56,6/9 atoms), K164(4x40,5/9 atoms), R188(ECL2,5/11 atoms), Q189(ECL2,5/9 atoms), S197(ECL2,5/6 atoms), E198(ECL2,5/9 atoms), R230(5x60,6/11 atoms), E234(5x64,5/9 atoms), R236(5x66,5/11 atoms), I239(5x69,5/8 atoms), L304(6x25,5/8 atoms), M305(6x26,6/8 atoms), R308(6x29,5/11 ato…
		4IAR	2.7	Intermediate	Ergotamine (agonist)	L138W(3x41)	I39(N-term,5/8 atoms), R76(1x59,5/11 atoms), R78(12x48,6/11 atoms), R114(23x49,7/11 atoms), K160(34x56,6/9 atoms), K164(4x40,6/9 atoms), R188(ECL2,5/11 atoms), Q189(ECL2,5/9 atoms), S197(ECL2,5/6 atoms), E198(ECL2,5/9 atoms), R230(5x60,6/11 atoms), K314(6x35,5/9 atoms), W345(ECL3,5/14 atoms), Q378(8x52,5/9 atoms), R385(C-term,5/11 atoms)
		6G79	3.78	Active	Donitriptan (agonist) Engineered Go heterotrimer	L138W(3x41)	K49(5/9 atoms,1x32), M54(5/8 atoms,1x37), T60(5/7 atoms,1x43), L65(5/8 atoms,1x48), R76(5/11 atoms,1x59), R78(5/11 atoms,12x48), K79(5/9 atoms,12x49), M103(5/8 atoms,2x57), I105(5/8 atoms,2x59), M108(5/8 atoms,2x62), R114(5/11 atoms,23x49), T116(5/7 atoms,23x51), L117(5/8 atoms,23x52), Q119(5/9 atoms,3x22), V120(5/7 atoms,3x23), D123(5/8 atoms,3x26), D153(5/8 atoms,3x56), S158(5/6 atoms,34x54), E…
8	5HT2B_HUMAN (5-HT2B)	4IB4	2.7	Intermediate	Ergotamine (agonist)	M144W(3x41)	K53(N-term,5/9 atoms), K84(12x49,7/9 atoms), E118(ECL1,5/9 atoms), M120(23x49,5/8 atoms), V126(3x23,5/7 atoms), L127(3x24,5/8 atoms), I161(34x51,5/8 atoms), Q162(34x52,5/9 atoms), N164(34x54,5/8 atoms), Q165(34x55,5/9 atoms), Y166(34x56,5/12 atoms), R169(4x39,8/11 atoms), I195(ECL2,5/8 atoms), E196(ECL2,6/9 atoms), T197(ECL2,5/7 atoms), N203(ECL2,5/8 atoms), I205(ECL2,5/8 atoms), E212(ECL2,5/9 at…
		4NC3	2.8	Intermediate	Ergotamine (agonist)	M144W(3x41)	E49(N-term,5/9 atoms), K53(N-term,6/9 atoms), E118(ECL1,5/9 atoms), M120(23x49,5/8 atoms), L125(3x22,6/8 atoms), R153(3x50,6/11 atoms), K159(3x56,5/9 atoms), I161(34x51,5/8 atoms), Q162(34x52,5/9 atoms), Y166(34x56,6/12 atoms), T197(ECL2,5/7 atoms), I205(ECL2,5/8 atoms), K211(ECL2,6/9 atoms), R321(6x32,6/11 atoms), K324(6x35,6/9 atoms), K385(8x48,5/9 atoms), R400(C-term,5/11 atoms)
		5TUD	3	Intermediate	Ergotamine (agonist)	M144W(3x41)	H55(1x34,5/10 atoms), W56(1x35,5/14 atoms), I61(1x40,5/8 atoms), M63(1x411,5/8 atoms), L81(1x59,5/8 atoms), K83(12x48,5/9 atoms), K84(12x49,5/9 atoms), I155(3x52,5/8 atoms), K159(3x56,5/9 atoms), Q162(34x52,5/9 atoms), N164(34x54,5/8 atoms), Q165(34x55,5/9 atoms), Y166(34x56,5/12 atoms), R169(4x39,5/11 atoms), K175(4x45,6/9 atoms), K175(4x45,7/9 atoms), E319(6x30,5/9 atoms), Q320(6x31,5/9 atoms),…
		5TVN	2.9	Intermediate	LSD (agonist)	M144W(3x41)	E42(N-term,5/9 atoms), M43(N-term,5/8 atoms), K44(N-term,5/9 atoms), Q45(N-term,5/9 atoms), I46(N-term,5/8 atoms), V47(N-term,5/7 atoms), E48(N-term,5/9 atoms), E49(N-term,5/9 atoms), Q50(N-term,5/9 atoms), K83(12x48,5/9 atoms), K84(12x49,5/9 atoms), E118(ECL1,5/9 atoms), M120(23x49,5/8 atoms), K158(3x55,5/9 atoms), K159(3x56,5/9 atoms), I161(34x51,5/8 atoms), N164(34x54,5/8 atoms), Q165(34x55,5/…
		6DRX	3.1	Intermediate	lisuride	M144W(3x41)	E48(5/9 atoms,N-term), E49(5/9 atoms,N-term), Q50(5/9 atoms,N-term), K53(5/9 atoms,N-term), L59(5/8 atoms,1x38), E82(5/9 atoms,1x60), K84(7/9 atoms,12x49), E118(5/9 atoms,ECL1), M120(5/8 atoms,23x49), L123(5/8 atoms,23x52), L125(5/8 atoms,3x22), V126(5/7 atoms,3x23), R153(5/11 atoms,3x50), K159(5/9 atoms,3x56), I161(5/8 atoms,34x51), Q162(5/9 atoms,34x52), N164(5/8 atoms,34x54), Q165(5/9 atoms,34…
		6DRY	2.92	Intermediate	Methylergonovine	M144W(3x41)	M43(5/8 atoms,N-term), K44(5/9 atoms,N-term), Q45(5/9 atoms,N-term), I46(5/8 atoms,N-term), K53(5/9 atoms,N-term), K83(5/9 atoms,12x48), K84(5/9 atoms,12x49), E118(5/9 atoms,ECL1), R153(5/11 atoms,3x50), K158(5/9 atoms,3x55), K159(5/9 atoms,3x56), I161(5/8 atoms,34x51), Q162(5/9 atoms,34x52), N164(5/8 atoms,34x54), N167(5/8 atoms,34x57), R169(5/11 atoms,4x39), I195(5/8 atoms,ECL2), E196(5/9 atoms…
		6DRZ	3.1	Intermediate	Methysergide	M144W(3x41), A225G(5x461)	I39(5/8 atoms,N-term), E41(5/9 atoms,N-term), E42(5/9 atoms,N-term), M43(5/8 atoms,N-term), K44(5/9 atoms,N-term), Q45(5/9 atoms,N-term), I46(5/8 atoms,N-term), V47(5/7 atoms,N-term), E48(5/9 atoms,N-term), E49(5/9 atoms,N-term), Q50(5/9 atoms,N-term), K53(5/9 atoms,N-term), E82(5/9 atoms,1x60), K83(5/9 atoms,12x48), K84(5/9 atoms,12x49), T89(5/7 atoms,2x39), Y91(5/12 atoms,2x41), E118(5/9 atoms,…
		6DS0	3.19	Intermediate	LY266097	M144W(3x41)	K53(5/9 atoms,N-term), K84(7/9 atoms,12x49), E118(5/9 atoms,ECL1), M120(5/8 atoms,23x49), V126(5/7 atoms,3x23), K159(5/9 atoms,3x56), I161(5/8 atoms,34x51), Q162(5/9 atoms,34x52), N164(5/8 atoms,34x54), S168(5/6 atoms,ICL2), R169(8/11 atoms,4x39), I195(5/8 atoms,ECL2), E196(6/9 atoms,ECL2), T197(5/7 atoms,ECL2), N203(5/8 atoms,ECL2), I205(5/8 atoms,ECL2), E212(5/9 atoms,ECL2), R321(5/11 atoms,6x3…
9	5HT2C_HUMAN (5-HT2c)	6BQH	2.7	Inactive	Ritanserin (inverse agonist)	C360N(7x45)	E338(ECL3,5/9 atoms), K339(ECL3,5/9 atoms), S340(ECL3,5/6 atoms)
		6BQG	3	Intermediate	Ergotamine (agonist)	C360N(7x45)	S163(34x54,5/6 atoms), R164(34x55,7/11 atoms), R243(5x67,5/11 atoms), Q301(6x25,5/9 atoms), R307(6x31,5/11 atoms), L336(6x60,5/8 atoms), E338(ECL3,5/9 atoms), K339(ECL3,5/9 atoms), S340(ECL3,5/6 atoms), Y387(C-term,5/12 atoms)
10	ADRB1_MELGA (β1AR)	2VT4	2.7	Inactive	Cyanopindolol (antagonist)	R68S(1x59), M90V(2x53), C116L(3x27), Y227A(5x58), A282L(6x27), F327A(7x36), F338M(7x48), C358A(8x59)	No missing atoms
		2YCW	3	Inactive	(S)-Carazolol (antagonist)	R68S(1x59), M90V(2x53), C116L(3x27), Y227A(5x58), A282L(6x27), F327A(7x36), F338M(7x48), C358A(8x59)	No missing atoms
		2YCX	3.3	Inactive	Cyanopindolol (antagonist)	R68S(1x59), M90V(2x53), C116L(3x27), Y227A(5x58), A282L(6x27), F327A(7x36), F338M(7x48), C358A(8x59)	No missing atoms
		2YCY	3.2	Inactive	Cyanopindolol (antagonist)	R68S(1x59), M90V(2x53), C116L(3x27), Y227A(5x58), A282L(6x27), F327A(7x36), F338M(7x48), C358A(8x59)	No missing atoms
		2YCZ	3.7	Inactive	Iodocyanopindolol (antagonist)	R68S(1x59), M90V(2x53), C116L(3x27), Y227A(5x58), A282L(6x27), F327A(7x36), F338M(7x48)	No missing atoms
		3ZPQ	2.8	Inactive	4-(piperazin-1- yl)-1H-indole (antagonist)	R68S(1x59), M90V(2x53), C116L(3x27), Y227A(5x58), A282L(6x27), F327A(7x36), F338M(7x48), C358A(8x59)	No missing atoms
		3ZPR	2.7	Inactive	4-METHYL-2-(PIPERAZIN-1-YL) QUINOLINE (antagonist)	R68S(1x59), M90V(2x53), C116L(3x27), Y227A(5x58), A282L(6x27), F327A(7x36), F338M(7x48), C358A(8x59)	No missing atoms
		4AMJ	2.3	Inactive	Carvedilol (Inverse agonist)	R68S(1x59), M90V(2x53), C116L(3x27), Y227A(5x58), A282L(6x27), F327A(7x36), F338M(7x48), C358A(8x59)	No missing atoms
		4BVN	2.1	Inactive	Cyanopindolol (antagonist)	R68S(1x59), M90V(2x53), C116L(3x27), I129V(3x40), Y227A(5x58), A282L(6x27), D322K(7x31), F327A(7x36), F338M(7x48), Y343L(7x53), C358A(8x59)	No missing atoms
		4GPO	3.5	Inactive	Ligand-free	V31M(N-term), S32G(N-term), R68S(1x59), M90V(2x53), C116L(3x27), Y227A(5x58), A282L(6x27), F327A(7x36), F338M(7x48), C358A(8x59)	No missing atoms
		5A8E	2.4	Inactive	7-methylcyanopindolol (inverse agonist)	R68S(1x59), M90V(2x53), C116L(3x27), I129V(3x40), E130W(3x41), Y227A(5x58), A282L(6x27), F327A(7x36), F338M(7x48), Y343L(7x53), C358A(8x59)	No missing atoms
		5F8U	3.4	Inactive	Cyanopindolol (antagonist)	R68S(1x59), M90V(2x53), C116L(3x27), Y227A(5x58), A282L(6x27), F327A(7x36), F338M(7x48), C358A(8x59)	No missing atoms
		2Y00	2.5	Intermediate	Dobutamine (partial agonist)	R68S(1x59), M90V(2x53), C116L(3x27), Y227A(5x58), A282L(6x27), F327A(7x36), F338M(7x48), C358A(8x59)	No missing atoms
		2Y01	2.6	Intermediate	Dobutamine (partial agonist)	R68S(1x59), M90V(2x53), C116L(3x27), Y227A(5x58), A282L(6x27), F327A(7x36), F338M(7x48), C358A(8x59)	L83(2x46, 7/8 atoms)
		2Y02	2.6	Intermediate	Carmoterol (agonist)	R68S(1x59), M90V(2x53), C116L(3x27), Y227A(5x58), A282L(6x27), F327A(7x36), F338M(7x48), C358A(8x59)	No missing atoms
		2Y03	2.9	Intermediate	Isoprenaline (agonist)	R68S(1x59), M90V(2x53), C116L(3x27), Y227A(5x58), A282L(6x27), F327A(7x36), F338M(7x48), C358A(8x59)	No missing atoms
		2Y04	3.1	Intermediate	Salbutamol (partial agonist)	R68S(1x59), M90V(2x53), C116L(3x27), Y227A(5x58), A282L(6x27), F327A(7x36), F338M(7x48), C358A(8x59)	No missing atoms
		4AMI	3.2	Intermediate	Bucindolol (agonist)	R68S(1x59), M90V(2x53), C116L(3x27), Y227A(5x58), A282L(6x27), F327A(7x36), F338M(7x48), C358A(8x59)	No missing atoms
11	OPRD_HUMAN (δOR)	4N6H	1.8	Inactive	Naltrindole (antagonist)	P37S(N-term)	R41(1x24,7/11 atoms), K81(12x51,18/9 atoms),V154(34x51,5/7 atoms), L157(34x54,6/8 atoms), K166(4x43,8/9 atoms), L167(4x44,16/8 atoms), M184(4x61,16/8 atoms), R192(ECL2,7/11 atoms), D193(ECL2,6/8 atoms), K214(5x40,15/9 atoms), L227(5x52,16/8 atoms), S242(5x67,9/6 atoms), V243(5x68,11/7 atoms), K250(6x24,6/9 atoms), E251(6x25,5/9 atoms), K252(6x26,7/9 atoms), R254(6x28,6/11 atoms), K326(8x51,6/9 at…
		4RWA	3.3	Inactive	DIPP-NH2 (antagonist)	No mutation	S42(1x25,5/6 atoms), T78(12x48,5/7 atoms), K79(12x49,7/9 atoms), V154(34x51,5/7 atoms), K155(34x52,6/9 atoms), D158(34x55,6/8 atoms), R160(34x57,8/11 atoms), K166(4x43,6/9 atoms), R192(ECL2,5/11 atoms), K214(5x40,7/9 atoms), L238(5x63,5/8 atoms), K250(6x24,6/9 atoms), E251(6x25,5/9 atoms), K252(6x26,6/9 atoms), R254(6x28,5/11 atoms), L256(6x30,5/8 atoms), R257(6x31,7/11 atoms), R258(6x32,5/11 ato…
		4RWD	2.7	Inactive	DIPP-NH2 (antagonist)	No mutation	K79(12x49,6/9 atoms), R76(1x59,6/11 atoms), K155(34x52,7/9 atoms), R192(ECL2,6/11 atoms), L238(5x63,5/8 atoms), R239(5x64,5/11 atoms), R241(5x66,5/11 atoms), S242(5x67,5/6 atoms), V243(5x68,5/6 atoms), R244(ICL3,6/11 atoms), L245(ICL3,5/8 atoms), L246(ICL3,5/8 atoms), E251(6x25,5/9 atoms), K252(6x26,6/9 atoms), R254(6x28,6/11 atoms), L256(6x30,5/8 atoms), R258(6x32,7/11 atoms), R292(ECL3,5/11 ato…
11*	OPRD_MOUSE (δOR)	4EJ4	3.4	Inactive	Naltrindole (antagonist)	No mutation	R41(1x24,10/11 atoms), K79(12x49,5/9 atoms), V154(34x51,5/7 atoms), K155(34x52,5/9 atoms), R192(ECL2,5/11 atoms), Q201(ECL2,5/9 atoms), R241(5x66,5/11 atoms), S242(5x67,5/6 atoms), R244(ICL3,5/11 atoms), K252(6x26,5/9 atoms), R291(ECL3,5/11 atoms), R292(ECL3,5/11 atoms), E323(8x48,5/9 atoms), N324(8x49,5/8 atoms), R327(8x52,5/11 atoms)
12	OPRX_HUMAN (NOP)	4EA3	3	Inactive	Compound-24 (antagonist)	No mutation	L48(1x29,5/8 atoms), E194(ECL2,5/9 atoms), D195(ECL2,5/8 atoms), E196(ECL2,5/9 atoms), R243(5x66,5/11 atoms), V245(5x68,5/7 atoms), R246(ICL3,5/11 atoms), L247(ICL3,5/8 atoms), L248(ICL3,5/8 atoms), S251(6x23,5/6 atoms)
		5DHG	3	Inactive	C-35 (antagonist)	H38I(N-term), R42L(N-term)	L48(1x29,5/8 atoms), E194(ECL2,5/9 atoms), D195(ECL2,5/8 atoms), E196(ECL2,5/9 atoms), R243(5x66,5/11 atoms), V245(5x68,5/7 atoms), R246(ICL3,5/11 atoms), L247(ICL3,5/8 atoms), L248(ICL3,5/8 atoms), S251(6x23,5/6 atoms)
		5DHH	3	Inactive	SB-612111 (antagonist)	H38I(N-term), R42L(N-term)	F45(N-term,4/11 atoms), L48(1x29,5/8 atoms), W175(4x50,13/14 atoms), V193(ECL2,5/7 atoms), E194(ECL2,5/9 atoms), D195(ECL2,5/8 atoms), E196(ECL2,5/9 atoms), E197(ECL2,5/9 atoms), I198(ECL2,5/8 atoms), V245(5x68,5/7 atoms), R246(ICL3,5/11 atoms), L247(ICL3,5/8 atoms), L248(ICL3,5/8 atoms), S251(6x23,5/6 atoms)
13	AA1R_HUMAN (A1AR)	5N2S	3.3	Inactive	PSB36 (antagonist)	A57L(2x52), T91A(3x36), N159A(ECL2), Y205A(5x63), L236A(6x37), L240A(6x41), T277A(7x41), C309S(8x64)	No missing atoms
		5UEN	3.2	Inactive	DU172 (antagonist)	N159A(ECL2), fragment (220-228) replaced by AA2AR_HUMAN (A2AR)	No missing atoms
		6D9H	3.6	Active	Adenosine (agonist) heterotrimeric Gi2	No mutation	No missing atoms
14	AGTR1_HUMAN (AT1R)	4YAY	2.9	Inactive	ZD7155 (antagonist)	No mutation	R13(N-term,5/11 atoms), I14(N-term,5/8 atoms), K20(N-term,5/9 atoms), K135(34x52,5/9 atoms), S136(34x53,5/6 atoms), R137(34x54,5/11 atoms), I177(ECL2,5/8 atoms), E185(ECL2,5/9 atoms), L191(5x35,6/8 atoms), I193(5x37,6/8 atoms), T198(5x42,5/7 atoms), K199(5x43,6/9 atoms), I201(5x45,7/8 atoms), L205(5x48,6/8 atoms), F206(5x49,5/11 atoms), F208(5x51,6/11 atoms), K224(5x67,5/9 atoms), N235(6x30,5/8 a…
		4ZUD	2.8	Inactive	Olmesartan (inverse agonist)	No mutation	I53(1x57,5/8 atoms), Y54(1x58,5/12 atoms), Y56(1x60,5/12 atoms), M57(12x48,5/8 atoms), K58(12x49,5/9 atoms), K60(12x51,5/9 atoms), E173(ECL2,5/9 atoms), E185(ECL2,5/9 atoms), L202(5x46,5/8 atoms), F204(5x47,5/11 atoms), F206(5x49,5/11 atoms), W219(5x62,5/14 atoms), K220(5x63,5/9 atoms), N235(6x30,5/8 atoms), D236(6x31,5/8 atoms), K240(6x35,5/9 atoms), L268(6x63,5/8 atoms), missing residues( from …
15	AGTR2_HUMAN (AT2R)	5UNF	2.8	Intermediate	CHEMBL289472 (ligand)	No mutation	R107(ECL1,5/11 atoms), E188(ECL2,5/9 atoms), K203(5x31,5/9 atoms), T241(5x68,5/7 atoms), S243(ICL3,5/6 atoms), S289(7x23,5/6 atoms), L300(7x34,5/8 atoms), R330(8x55,5/11 atoms), F333(8x58,5/11 atoms)
		5UNG	2.8	Intermediate	CHEMBL289472 (ligand)	No mutation	S36(N-term,5/6 atoms), K38(N-term,5/9 atoms), D41(N-term,5/8 atoms), H43(N-term,5/10 atoms), L44(N-term,5/8 atoms), Q72(1x60,5/9 atoms), K77(ICL1,5/9 atoms), R154(34x55,6/11 atoms), R155(34x56,8/11 atoms), W158(4x40,5/14 atoms), E188(ECL2,5/9 atoms), T241(5x68,5/7 atoms), Q326(8x51,5/9 atoms), R330(8x55,5/11 atoms), F333(8x58,5/11 atoms)
		5UNH	2.9	Intermediate	8EM (ligand)	No mutation	D41(N-term,5/8 atoms), K77(ICL1,5/9 atoms), Y148(3x56,5/12 atoms), Y162(4x44,5/12 atoms), E188(ECL2,5/9 atoms), Y189(ECL2,5/12 atoms), E202(ECL2,5/9 atoms), K203(5x31,5/9 atoms), H237(5x64,5/10 atoms), K240(5x67,5/9 atoms), T241(5x68,5/7 atoms), K246(6x25,5/9 atoms), N247(6x26,5/8 atoms), R251(6x30,5/11 atoms), Q326(8x51,5/9 atoms), K328(8x53,5/9 atoms), L329(8x54,5/8 atoms), R330(8x55,5/11 atoms…
		5XJM	3.2	Intermediate	peptide ligand [Sar1, Ile8]AngII	No mutation	No missing atoms
16	APJ_HUMAN (APJ)	5VBL	2.6	Inactive	AMG3054 (agonist) inactive-mutations	V117A(3x40), T177N(ECL2), W261K(6x48), C325L(8x59), C326M(8x60)	No missing atoms
17	Q9WTK1_CAVPO (BLT1)	5X33	3.7	Inactive	BIIL260 (antagonist)	H83G(ECL1), K88G(3x21), V212A(5x67), S309A(C-term)	K47(1x59,5/9 atoms), R48(1x60,5/11 atoms), R50(12x49,5/11 atoms), K51(12x50,5/9 atoms),K133(4x39,5/9 atoms), R211(5x66,5/9 atoms), R217(ICL3,5/11 atoms), R218(6x30,5/11 atoms), D256(7x24,5/8 atoms), Q257(7x25,5/9 atoms), K259(7x27,5/9 atoms), Q260(7x28,5/9 atoms), N264(7x32,5/8 atoms), missing residues( from G288(8x47) to C-term)
18	C5AR1_HUMAN (C5aR1)	5O9H	2.7	Inactive	NDT9513727 (inverse agonist)	S85A(2x53), I91A(2x59), I142A(34x51), N146R(34x55), A156L(4x45), F172A(4x62), R232A(5x68), A234E(ICL3), L311E(8x54), S317E(8x60), N321E(C-term)	No missing atoms
		6C1Q	2.9	Inactive	PMX53(antagonist) NDT9513727(allosteric antagonist)	No mutation	E180(5/9 atoms,ECL2), Y181(5/12 atoms,ECL2), F182(5/11 atoms,ECL2), K185(5/9 atoms,ECL2), H194(5/10 atoms,ECL2), R232(5/11 atoms,5x68), K242(5/9 atoms,6x35), K280(5/9 atoms,7x32), Q305(5/9 atoms,8x48), F307(5/11 atoms,8x50), Q308(5/9 atoms,8x51)
		6C1R	2.2	Inactive	PMX53(antagonist) avacopan(allosteric antagonist)	No mutation	N31(5/8 atoms,N-term), E65(5/9 atoms,1x60), R68(5/11 atoms,ICL1), F182(5/11 atoms,ECL2), R197(5/11 atoms,ECL2), R233(5/11 atoms,ICL3), K239(5/9 atoms,6x32), K242(5/9 atoms,6x35), F307(5/11 atoms,8x50), K313(5/9 atoms,8x56), N321(5/8 atoms,c-term), E325(5/9 atoms,c-term), E326(5/9 atoms,c-term),
19	CNR1_HUMAN (CB1)	5TGZ	2.8	Inactive	AM6538 (antagonist)	T210A(3x46), E273K(5x37), T283V(5x47), R340E(6x32)	M109(N-term,5/8 atoms), Q115(1x31,5/9 atoms), L117(1x33,5/8 atoms), Q261(ECL2,5/9 atoms), K370(ECL3,5/9 atoms)
		5U09	2.6	Inactive	Taranabant (antagonist)	T210A(3x46)	R145(12x48,5/11 atoms), R182(ECL1,5/11 atoms), Q261(ECL2,5/9 atoms), K370(ECL3,5/9 atoms)
		5XR8	3	Intermediate	AM841 (agonist)	T210A(3x46), E273K(5x37), T283V(5x47), R340E(6x32)	No missing atoms
		5XRA	2.8	Intermediate	AM11542 (agonist)	T210A(3x46), E273K(5x37), T283V(5x47), R340E(6x32)	No missing atoms
20	CCR2_HUMAN (CCR2)	5T1A	2.8	Inactive	BMS-681 （antagonist) CCR2-RA-[R] (allosteric antagonist)	L226S(5x62), K227R(5x63), T228A(5x64), L229S(5x65), L230K(5,66x66), R231S(5x67), C232R(5x68), R233I(ICL3), N234P(ICL3), E235P(ICL3), K236S(6x28), K237R(6x29), R238E(6x30), H239K(6x31), R230K(6x32)	K38(1x28,5/9 atoms), Q39(1x29,5/9 atoms), K74(12x51,5/9 atoms), K150(34x55,7/9 atoms), K183(ecl2,5/9 atoms), D185(ecl2,5/8 atoms), S186(ecl2,5/6 atoms), R196(5x33,5/11 atoms), S223(5x59,5/6 atoms), L230(5x66,5/8 atoms), F268(6x60,5/11 atoms), F271(6x63,5/11 atoms), N276(7x23,5/8 atoms), E278(7x25,5/9 atoms), Q285(7x32,6/9 atoms), A319(8x57,5/5 atoms)
21	CCR5_HUMAN (CCR5)	4MBS	2.7	Inactive	Maraviroc (antagonist)	C58Y(1x60), G163N(4x61), A233D(6x33), K303E(8x49)	Q21(N-term,5/9 atoms), K22(N-term,5/9 atoms), I23(N-term,5/8 atoms), K26(1x28,5/9 atoms), K59(12x48,6/9 atoms), K138(34x55,6/9 atoms), S179(45x51,5/6 atoms), K191(5x36,6/9 atoms), K228(ICL3,8/9 atoms), K229(ICL3,6/9 atoms), E262(6x62,5/9 atoms), F263(6x63,5/11 atoms), L266(ECL3,5/8 atoms), N267(ECL3,5/8 atoms), S272(7x27,5/6 atoms), Q277(7x32,6/9 atoms), Q280(7x35,6/9 atoms), R305(8x51,8/11 atoms…
		5UIW	2.2	Inactive	5P7-CCL5 (antagonist)	C58Y(1x60), G163N(4x61), A233D(6x33), K303E(8x49)	K22(N-term,7/9 atoms), I23(N-term,7/8 atoms), N57(1x59,5/8 atoms), R60(12x49,5/11 atoms), K62(12x51,5/9 atoms), V134(34x51,5/7 atoms), L137(34x54,5/8 atoms), K138(34x55,6/9 atoms), L174(ECL2,5/8 atoms), H175(ECL2,5/10 atoms), R223(5x67,6/11 atoms), E227(ICL3,5/9 atoms), K229(ICL3,5/9 atoms), H231(6x31,5/10 atoms), D233(6x33,5/8 atoms), E302(8x48,5/9 atoms), V310(8x56,5/7 atoms), K314(C-term,5/9 a…
22	CCR9_HUMAN (CCR9)	5LWE	2.8	Inactive	Vercirnon (antagonist)	S23A(N-term), T34E(N-term), T77A(12x48), V79A(12x50), M82A(2x38), S141C(3x47), T216A(5x41), V255A(6x36), N294A(7x29), T304A(7x39), C337A(C-term)	No missing atoms
23	CXCR4_HUMAN (CXCR4)	3ODU	2.5	Inactive	IT1t (antagonist)	L125W(3x41)	I53(1x47,12/8 atoms), S131(3x47,8/6 atoms), F249(6x45,22/11 atoms), S260(6x56,8/6 atoms)
		3OE0	2.9	Inactive	CVX15 (antagonist)	L125W(3x41), T240P(6x36)	Q233(ICL3, 5/9 atoms), K234(6x30, 5/9 atoms) missing residues( from F304(7x55) to C-term)
		3OE6	3.2	Inactive	IT1t (antagonist)	L125W(3x41)	D181(ECL2, 5/8 atoms)
		3OE8	3.1	Inactive	IT1t (antagonist)	L125W(3x41)	L69(12x50,5/8 atoms), V99(2x65,5/7 atoms), D182(ECL2,5/8 atoms), R183(ECL2,6/11 atoms), K234(6x30,5/9 atoms), L267(6x63,5/8 atoms), K271(ECL3,5/9 atoms), missing residues( from G306(8x47) to C-term)
		3OE9	3.1	Inactive	IT1t (antagonist)	L125W(3x41), T240P(6x36)	S144(34x53,5/6 atoms), K236(6x32,5/9 atoms), L238(6x34,6/8 atoms), I300(7x51,5/8 atoms), missing residues( from F304(7x55) to C-term)
		4RWS	3.1	Inactive	vMIP-II (antagonist)	L125W(3x41), D187C(45x51), T240P(6x36),	M24(N-term,5/8 atoms), K38(1x32,5/9 atoms), N56(1x50,5/8 atoms), K75(2x41,5/9 atoms), N143(34x52,5/8 atoms), K149(ICL2,5/9 atoms), Q233(ICL3,5/9 atoms), R235(6x31,5/11 atoms), K236(6x32,7/9 atoms), K239(6x35,5/9 atoms), missing residues( from F304(7x55) to C-term)
24	DRD2_HUMAN (D2R)	6CM4	2.87	Inactive	Risperidone (antagonist)	I122A(3x40), L375A(6x37), L379A(6x41)	N35(5/8 atoms,1x33),Y36(5/12 atoms,1x34),L43(5/8 atoms,1x41),E62(5/9 atoms,1x60),K63(5/9 atoms,12x48), V96(5/7 atoms,2x65),E99(5/9 atoms,23x49),K101(5/9 atoms,23x51),T144(5/7 atoms,34x55),R145(5/11 atoms,34x56), S147(5/6 atoms,34x58),K149(5/9 atoms,4x39),R150(5/11 atoms,4x40),N176(5/8 atoms,ECL2),D178(5/8 atoms,ECL2), Q179(5/9 atoms,ECL2),N180(5/8 atoms,ECL2),K211(7/9 atoms,5x60),R217(5/11 atoms,…
25	DRD3_HUMAN (D3R)	3PBL	2.9	Inactive	Eticlopride (antagonist)	L119W(3x41)	Q144(ICL2, 5/9 atoms), S145(ICL2, 5/6 atoms), T357(ECL3, 5/7 atoms)
26	DRD4_HUMAN (D4R)	5WIU	2	Inactive	Nemonapride (antagonist)	No mutation on receptor	E62(1x60,5/9 atoms), R63(12x48,5/11 atoms), Q97(2x66,5/9 atoms), L102(23x51,5/8 atoms), Q146(34x56,5/9 atoms), R150(4x40,7/11 atoms), D176(ecl2,5/8 atoms), R217(5x63,6/11 atoms), K391(6x32,5/9 atoms), R394(6x35,5/11 atoms), E454(8x49,5/9 atoms), R456(8x51,7/11 atoms), N457(8x52,5/8 atoms), R460(8x55,5/11 atoms), K461(8x56,8/9 atoms)
		5WIV	2.1	Inactive	Nemonapride (antagonist)	No mutation on receptor	Q33(1x31,5/9 atoms), E62(1x60,5/9 atoms), R63(12x48,5/11 atoms), L102(23x51,5/8 atoms), R142(34x52,5/11 atoms), Q146(34x56,5/9 atoms), D176(ecl2,5/8 atoms), K391(6x32,5/9 atoms), R394(6x35,5/11 atoms), R428(7x32,5/11 atoms), E454(8x49,5/9 atoms), R460(8x55,5/11 atoms), K461(8x56,8/9 atoms)
27	EDNRB_HUMAN (ETBR)	5X93	2.2	Inactive	K-8794 (antagonist)	R124Y(1x55), D154A(2x56), K270A(5x36), S342A(6x54), I381A(7x48), C396A(8x53), C400A(8x57), C405A(C-term)	K248(ECL2,5/9, N351(ECL3,5/8, D354(ECL3,5/8, R392(8x49,6/11, N395(8x52,5/8 atoms)
		5XPR	3.6	Inactive	Bosentan (antagonist)	R124Y(1x55), K270A(5x36), S342A(6x54), I381A(7x48), C396A(8x53), C400A(8x57), C405A(C-term)	Q91(1x22,5/9 atoms), K130(12x48,5/9 atoms), R133(12x51,5/11 atoms), N134(12x52,5/8 atoms), I155(2x57,5/8 atoms), Y160(2x62,5/12 atoms), I212(34x56,5/8 atoms), K248(ECL2,5/9 atoms), K262(ECL2,5/9 atoms), L252(ECL2,5/8 atoms), M245(ECL2,5/8 atoms), N356(ECL3,5/8 atoms), R253(ECL2,5/11 atoms), Y247(ECL2,5/12 atoms), Q267(5x33,5/9 atoms), F268(5x34,5/11 atoms), R319(6x31,5/11 atoms), K346(6x58,5/9 at…
		5GLI	2.5	Inactive	Ligand-free	R124Y(1x55), D154A(2x56), K270A(5x36), S342A(6x54), I381A(7x48)	E95(1x26,5/9 atoms), K216(4x40,5/9 atoms), K262(ECL2,5/9 atoms), D313(6x25,5/8 atoms), K316(6x28,7/9 atoms), K346(6x58,5/9 atoms), N351(ECL3,5/8 atoms), Q352(ECL3,5/9 atoms), N356(ECL3,5/8 atoms), K391(8x48,5/9 atoms)
		5GLH	2.8	Intermediate	Endothelin-1 (agonist)	R124Y(1x55), D154A(2x56), K270A(5x36), S342A(6x54), I381A(7x48)	Q91(1x22,5/9 atoms), E95(1x26,5/9 atoms), K97(1x28,5/9 atoms), E98(1x29,5/9 atoms), K101(1x32,5/9 atoms), R124(1x55,5/11 atoms), Y127(1x58,5/12 atoms), K128(1x59,5/9 atoms), R201(3x52,5/11 atoms), W217(4x41,5/14 atoms), K248(ECLl2,5/9 atoms), K262(ECL2,5/9 atoms), Q317(6x29,5/9 atoms), K323(6x35,5/9 atoms), D354(ECL3,5/8 atoms), K391(8x48,5/9 atoms), K398(8x55,5/9 atoms),
28	FFAR1_HUMAN (GPR40)	5TZR	2.2	Intermediate	MK-8666 (partial agonist)	L42A(2x40), F88A(3x34), G103A(3x49), Y202F(5x58)	R37(1x64,5/11 atoms), L38(ICL1,5/8 atoms), Y122(4x41,5/12 atoms), H153(ECL2,5/10 atoms), R281(8x48,5/11 atoms)
		5TZY	3.2	Intermediate	MK-8666 (partial agonist) AP8 (agoPAM)	L42A(2x40), G103A(3x49), Y202F(5x58)	Q6(1x33,5/9 atoms), R28(1x55,5/11 atoms), H33(1x60,5/10 atoms), R35(1x62,5/11 atoms), R37(1x64,5/11 atoms), L38(ICL1,5/8 atoms), H153(ECL2,5/10 atoms), S167(ECL2,5/6 atoms), W174(ECL2,5/14 atoms), R211(5x67,5/11 atoms), L214(ICL3,5/8 atoms), R217(6x29,5/11 atoms), K219(6x31,5/9 atoms)
		4PHU	2.3	Intermediate	TAK-875 (partial agonist)	L42A(2x40), F88A(3x34), G103A(3x49), Y202F(5x58)	R37(1x64,5/11 atoms), L38(ICL1,5/8 atoms), S123(4x42,9/6 atoms)
		5KW2	2.76	Intermediate	Compound 1 (agonist)	L42A(2x40), F88A(3x34), G103A(3x49), Y202F(5x58)	No missing atoms
29	HRH1_HUMAN (H1R)	3RZE	3.1	Inactive	Doxepin (antagonist)	No mutation	K442(ECL3, 5/9 atoms), R481(8x56, 5/11 atoms)
30	LPAR1_HUMAN (LPA1)	4Z34	3	Inactive	ONO-9780307 (antagonist)	No mutation	F25(N-term,5/11 atoms), Y26(N-term,5/12 atoms), N27(N-term,5/8 atoms), E28(N-term,5/9 atoms), L41(N-term,5/8 atoms), R78(12x48,5/11 atoms), R79(12x49,5/11 atoms), F151(3x55,5/11 atoms), R152(3x56,5/11 atoms), M153(34x50,5/8 atoms), L155(34x52,5/8 atoms), R158(34x55,5/11 atoms), R162(4x40,5/11 atoms), D191(ECL2,5/8 atoms)
		4Z35	2.9	Inactive	ONO-9910539 (antagonist)	No mutation	I30(N-term,5/8 atoms), L41(N-term,5/8 atoms), R78(12x48,5/11 atoms), R79(12x49,5/11 atoms), R152(3x56,5/11 atoms), R158(34x55,5/11 atoms), 162(4x40,5/11 atoms), Q324(8x56,5/9 atoms), I325(8x57,5/8 atoms)
		4Z36	2.9	Inactive	ONO-3080573 (antagonist)	D204C(5x37), V282C(6x59)	R152(3x56,5/11 atoms), Q286(ECL3,5/9 atoms)
31	Q08BG4_DANRE (LPA6)	5XSZ	3.2	Intermediate	Ligand-free, detergent bound	No mutation	K26(1x31,5/9 atoms), Y27(1x32,5/12 atoms), M39(1x44,5/8 atoms), K57(12x49,5/9 atoms), L58(12x50,5/8 atoms), R59(12x51,5/11 atoms), Q89(2x66,5/9 atoms), L97(3x23,5/8 atoms), K100(3x26,5/9 atoms), R133(34x52,5/11 atoms), K140(4x39,5/9 atoms), R141(4x40,5/11 atoms), N166(4x65,5/8 atoms), N169(ECL2,5/8 atoms), K170(ECL2,5/9 atoms), L171(ECL2,5/8 atoms), E172(ECL2,5/9 atoms), N173(ECL2,5/8 atoms), S17…
32	ACM1_HUMAN (M1R)	5CXV	2.7	Inactive	Tiotropium (antagonist)	N2Q(N-term), N12Q(N-term), N110Q(3x37)	K51(1x58,5/9 atoms), R134(34x54,5/11 atoms), Q185(5x36,5/9 atoms), W209(5x59,5/14 atoms), R213(5x63,5/11 atoms), E216(5x66,5/9 atoms), K359(6x29,5/9 atoms), K392(ECL3,5/9 atoms), D393(ECL3,5/8 atoms), E397(7x31,5/9 atoms), D438(C-term,5/8 atoms), K439(C-term,5/9 atoms)
33	ACM3_RAT (M3R)	4DAJ	3.4	Inactive	Tiotropium (antagonist)	No mutation	W65(1x30,5/14 atoms), V67(1x32,5/7 atoms), V68(1x33,5/7 atoms), F69(1x34,5/11 atoms), F72(1x37,5/11 atoms), L77(1x42,5/8 atoms), I129(2x65,5/8 atoms), K212(ECL2,5/9 atoms), K555(8x55,5/9 atoms)
		4U14	3.6	Inactive	Tiotropium (antagonist)	No mutation	Q66(1x31,5/9 atoms), V67(1x32,5/7 atoms), I70(1x35,5/8 atoms), F72(1x37,5/11 atoms), K99(12x51,5/9 atoms), I129(2x65,5/8 atoms), K178(34x56,5/9 atoms), K182(4x40,5/9 atoms), F205(4x63,5/11 atoms), K484(6x29,5/9 atoms), S518(ECL3,5/6 atoms), K522(7x31,5/9 atoms), L545(7x55,5/8 atoms), K548(8x48,5/9 atoms), K555(8x55,5/9 atoms)
		4U15	2.8	Inactive	Tiotropium (antagonist)	No mutation	I64(1x29,5/8 atoms), V68(1x33,5/7 atoms), I70(1x35,5/8 atoms), K93(1x58,5/9 atoms), K96(12x48,5/9 atoms), Q97(12x49,5/9 atoms), R132(23x49,5/11 atoms), L135(23x52,5/8 atoms), R171(3x56,5/11 atoms), K178(34x56,5/9 atoms), K182(4x40,5/9 atoms), K212(ECL2,5/9 atoms), V215(ECL2,5/7 atoms), E258(5x66,5/9 atoms), K259(5x67,5/9 atoms), I483(6x28,5/8 atoms), K487(6x32,5/9 atoms), S518(ECL3,5/6 atoms), L5…
		4U16	3.7	Inactive	N-methyl scopolamine (antagonist)	No mutation	I64(1x29,5/8 atoms), W65(1x30,5/14 atoms), K93(1x58,5/9 atoms), K96(12x48,5/9 atoms), K99(12x51,5/9 atoms), M121(2x57,5/8 atoms), I129(2x65,5/8 atoms), R132(23x49,5/11 atoms), L135(23x52,5/8 atoms), R171(3x56,5/11 atoms), L173(34x51,5/8 atoms), K182(4x40,5/9 atoms), K212(ECL2,5/9 atoms), R213(ECL2,5/11 atoms), Q223(ECL2,5/9 atoms), K255(5x63,5/9 atoms), E258(5x66,5/9 atoms), K484(6x29,5/9 atoms),…
34	ACM4_HUMAN (M4R)	5DSG	2.6	Inactive	Tiotropium (antagonist)	No mutation	R143(34x56,5/11 atoms), K397(6x32,5/9 atoms), K462(8x52,5/9 atoms)
35	NTR1_RAT (NTSR1)	3ZEV	3	Intermediate	Neurotensin(8-13) (agonist)	A86L(1x54), H103D(2x40), H105Y(2x42), A161V(3x44), R167L(R3x50), R213L(ECL2), V234L(5x36), I253A(5x54), H305R(6x32), F358V(7x41), S362A(7x46)	H269(5x70, 5/9 atoms), Q270(5x71, 5/10 atoms)
		4BUO	2.8	Intermediate	Neurotensin(8-13) (agonist)	A86L(1x54), H103D(2x40), H105Y(2x42), A161V(3x44), R167L(R3x50), R213L(ECL2), V234L(5x36), I253A(5x54), H305R(6x32), F358V(7x41), S362A(7x46)	Q270(5x71, 5/10 atoms)
		4BV0	3.1	Intermediate	Neurotensin(8-13) (agonist)	S83G(1x51), A86L(1x54), T101R(2x38), H103D(2x40), H105Y(2x42), L119F(2x551), M121L(2x57), E124D(2x60), L125V(2x61), R143K(3x26), D150E(3x33), A161V(3x44), R167L(R3x50), C172R(3x55), A177H(34x53), 208V(4x65), R213L(ECL2), V234L(5x36), V240L(5x42), I253A(5x54), N262R(5x63), K263R(5x64), H305R(6x32), V313M(6x40), C332V(6x59), F342A(7x25), T354S(7x37), F358V(7x41), S362A(7x46)	No missing atoms
		4BWB	3.6	Intermediate	Neurotensin(8-13) (agonist)	S83G(1x51), A86L(1x54), T101R(2x38), H103D(2x40), H105Y(2x42), L119F(2x551), M121L(2x57), E124D(2x60), R143K(3x26), D150E(3x33), A161V(3x44), R167L(R3x50), R213L(ECL2), V234L(5x36), K235R(5x37), V240L(5x42), I253A(5x54), I260A(5x61), N262R(5x63), K263R(5x64), H305R(6x32), C332V(6x59), F342A(7x25), T354S(7x37), F358V(7x41), S362A(7x46)	Q96(12x51, 5/9 atoms)
		4GRV	2.8	Intermediate	Neurotensin(8-13) (agonist)	A86L(1x54), E166A(3x49), G215A(ECL2), L310A(6x37), F358A(7x41), V360A(7x43)	N58(N-term,5/8 atoms), R91(1x59,5/11 atoms), K92(1x60,5/9 atoms), S97(2x34,5/6 atoms), K178(34x54,5/9 atoms), M181(34x57,5/8 atoms), R183(4x39,5/11 atoms), K187(4x43,5/9 atoms), K188(4x44,5/9 atoms), D230(ECL2,5/8 atoms), K263(5x64,5/9 atoms), S335(ECL3,5/6 atoms), Q338(ECL3,5/9 atoms), D345(7x28,5/8 atoms), R377(8x51,5/11 atoms)
		4XEE	2.9	Intermediate	Neurotensin(8-13) (agonist)	A86L(1x54), G215A(ECL2), V360A(7x43)	No missing atoms
		4XES	2.6	Intermediate	Neurotensin(8-13) (agonist)	A86L(1x54), E166A(3x49), G215A(ECL2), V360A(7x43)	No missing atoms
		5T04	3.3	Intermediate	Neurotensin(8-13) (agonist)	A86L(1x54), G215A(ECL2), F358A(7x41), V360A(7x43)	F376(8x50,0/11 atoms), R377(8x51,0/11 atoms)
36	OX1R_HUMAN (OX1R)	4ZJ8	2.8	Inactive	Suvorexant (antagonist)	V319I(6x56)	No missing atoms
		4ZJC	2.8	Inactive	SB-674042 (antagonist)	V319I(6x56)	No missing atoms
37	OX2R_HUMAN (OX2R)	4S0V	2.5	Inactive	Suvorexant (antagonist)	I308V(6x39)	K203(ECL2,5/9 atoms), H335(ECL3,5/10 atoms)
		5WS3	2.3	Inactive	EMPA (antagonist)	I308V(6x39)	No missing atoms
		5WQC	1.96	Inactive	EMPA (antagonist)	I308V(6x39)	No missing atoms
38	P2RY1_HUMAN (P2Y1R)	4XNV	2.2	Inactive	BPTU (antagonist, NAM)	D320N(7x49)	T45(N-term,5/7 atoms), K158(34x52,5/9 atoms), L160(34x54,5/8 atoms), T330(8x49,5/7 atoms), R332(8x51,5/11 atoms), R334(8x53,5/11 atoms)
		4XNW	2.7	Inactive	MRS2500 (antagonist)	D320N(7x49)	R332(8x51,5/11 atoms), R333(8x52,5/11 atoms), R334(8x53,5/11 atoms)
39	P2Y12_HUMAN (P2Y12R)	4NTJ	2.6	Inactive	AZD1283 (antagonist)	D294N(7x49)	R54(ICL1,5/11 atoms), K56(ICL1,5/9 atoms), K86(2x66,5/9 atoms), R93(3x21,5/11 atoms), K131(34x52,5/9 atoms), L138(4x39,5/8 atoms), L139(4x40,5/8 atoms), I161(4x62,5/8 atoms), K179(ECL2,5/9 atoms), E215(5x64,5/9 atoms), K228(ICL3,5/9 atoms), R231(6x31,5/11 atoms), K232(6x32,5/9 atoms), K233(6x33,5/9 atoms), V236(6x36,5/7 atoms), K237(6x37,8/9 atoms), S262(6x61,5/6 atoms), Q263(6x62,5/9 atoms), T26…
		4PXZ	2.5	Intermediate	2-MeSADP (agonist)	D294N(7x49)	R48(1x55,5/11 atoms), F50(1x57,5/11 atoms), R54(ICL1,6/11 atoms), K56(ICL1,5/9 atoms), K136(34x57,5/9 atoms), R168(ECL2,8/11 atoms), E181(5x30,6/9 atoms), Y298(7x53,5/12 atoms), C302(8x47,5/6 atoms), K303(8x48,5/9 atoms), F305(8x50,5/11 atoms), R306(8x51,0/11 atoms)
		4PY0	3.1	Intermediate	2-MeSATP (agonist)	D294N(7x49)	K56(ICL1,5/9 atoms), K136(34x57,5/9 atoms), R165(ECL2,5/11 atoms), R168(ECL2,5/11 atoms), D169(ECL2,5/8 atoms), K170(ECL2,5/9 atoms), N171(ECL2,5/8 atoms), E181(5x30,6/9 atoms), R218(5x67,5/11 atoms), K232(6x32,5/9 atoms), L293(7x48,5/8 atoms), Y298(7x53,5/12 atoms), C302(8x47,5/6 atoms), K303(8x48,5/9 atoms), F305(8x50,5/11 atoms), R306(8x51,0/11 atoms)
40	PAR1_HUMAN (PAR1)	3VW7	2.2	Inactive	Vorapaxar (antagonist)	N250G(ECL2), N259S(ECL2)	Q379(8x51,0/11 atoms), missing residues( from Q379(8x51) to C-term)
41	PAR2_HUMAN (PAR2)	5NDD	2.8	Inactive	AZ8838 (antagonist)	G89A(1x46), H108A(2x37), G157A(3x34), M166L(3x43), Y174A(3x51), V176E(3x53), N222Q(ECL2), M268A(5x64), I289A(6x38), L293A(6x42)	No missing atoms
		5NDZ	3.6	Inactive	AZ3451 (antagonist)	G89A(1x46), H108A(2x37), G157A(3x34), M166L(3x43), Y174A(3x51), V176E(3x53), N222Q(ECL2), M268A(5x64), I289A(6x38), L293A(6x42)	No missing atoms
42	S1PR1_HUMAN (S1P1)	3V2W	3.4	Inactive	ML056 (antagonist)	S251N(6x30), L252V(6x31)	L47(1x34,5/8 atoms), E62(1x49,5/9 atoms), K72(1x59,5/9 atoms), K74(12x48,5/9 atoms), K75(12x49,5/9 atoms), R78(2x37,5/11 atoms), E141(3x49,5/9 atoms), M180(4x62,5/8 atoms), R223(5x60,8/11 atoms), R229(5x66,5/11 atoms), R231(5x68,5/11 atoms), R246(6x25,5/11 atoms), L252(6x31,5/8 atoms), L255(6x34,5/8 atoms), V284(ECL3,5/7 atoms), K285(ECL3,5/9 atoms), R319(8x51,5/11 atoms), R324(8x56,5/11 atoms)
		3V2Y	2.8	Inactive	ML056 (antagonist)	S251N(6x30), L252V(6x31)	S38(N-term,5/6 atoms), D40(N-term,5/8 atoms), K41(N-term,5/9 atoms), E42(1x29,5/9 atoms), N43(1x30,5/8 atoms), S44(1x31,5/6 atoms), I45(1x32,5/8 atoms), K72(1x59,5/9 atoms), K75(12x49,5/9 atoms), R78(2x37,5/11 atoms), N157(4x39,5/8 atoms), R223(5x60,5/11 atoms), R229(5x66,5/11 atoms), R231(5x68,5/11 atoms), R246(6x25,5/11 atoms), L255(6x34,5/8 atoms), K256(6x35,5/9 atoms), K285(ECL3,5/9 atoms), R…
43	US28_HCMVA (US28)	4XT1	2.9	Intermediate	CX3CL1 (agonist)	No mutation	R62(12x48,5/11 atoms), R63(12x49,5/11 atoms), Q65(12x51,5/9 atoms), Q91(2x62,5/9 atoms), R137(ICL2,6/11 atoms), K297(8x49,5/9 atoms)
		5WB1	3.51	Intermediate	Ligand-free Intracellular nanobody	Q311L(C-term), R312V(C-term), L313P(C-term), F314R(C-term), S315G(C-term),	R61(5/11 atoms,1x60), R62(5/11 atoms,12x48), R63(5/11 atoms,12x49), Q65(5/9 atoms,12x51), Q91(5/9 atoms,2x62), N97(5/8 atoms,ECL1), R139(5/11 atoms,ICL2), K142(5/9 atoms,4x40), K168(5/9 atoms,ECL2), K254(5/9 atoms,6x61), K297(5/9 atoms,8x49), R310(6/11 atoms,8x62)
		5WB2	3.5	Intermediate	CX3CL1.35 Intracellular nanobody	No mutation	R61(5/11 atoms,1x60), R62(5/11 atoms,12x48), R63(5/11 atoms,12x49), Q65(5/9 atoms,12x51), Q91(5/9 atoms,2x62), R137(6/11 atoms,ICL2), K142(5/9 atoms,4x40), K168(5/9 atoms,ECL2), K169(5/9 atoms,ECL2), Q172(5/9 atoms,ECL2), K297(5/9 atoms,8x49)
44	NPY1R_HUMAN (Y1R)	5ZBH	3	Inactive	BMS-193885 (antagonist)	F129W(3x41)	D31(5/8 atoms,N-term),D32(5/8 atoms,N-term), H34(5/10 atoms,N-term), M71(5/8 atoms,12x50), R149(5/11 atoms,ICL2), L189(5/8 atoms,ECL2), K193(5/9 atoms,ECL2), D250(5/8 atoms,6x22), N251(5/8 atoms,6x23), K252(5/9 atoms,6x24), R254(5/11 atoms,6x26), K325(5/9 atoms,8x48), R329(5/11 atoms,8x52), F333(5/11 atoms,8x56), F334(5/11 atoms,8x57), F335(5/11 atoms,8x58), F337(5/11 atoms,C-term)
		5ZBQ	2.7	Inactive	UR-MK299 (antagonist)	F129W(3x41)	F18(5/11 atoms,N-term), E20(5/9 atoms,N-term), K21(5/9 atoms,N-term), E29(5/9 atoms,N-term), N30(5/8 atoms,N-term), D32(5/8 atoms,N-term), E182(5/9 atoms,ECL2), K193(5/9 atoms,ECL2)
45	PTAFR_HUMAN (PTFR)	5ZKP	2.81	Inactive	SR 27417 (antagonist)	F116Y(3x51), N169D(ECL2), A230(6x34), V234A(6x38), D289N(7x49)	S6(5/6 atoms,N-term), H8(5/10 atoms,N-term), E12(5/9 atoms,1x29), K47(5/9 atoms,ICL1), R121(5/11 atoms,3x56), I123(5/8 atoms,34x51), L139(5/8 atoms,4x47), V143(5/7 atoms,4x51), K179(5/9 atoms,ECL2), D264(5/8 atoms,7x23), K266(5/9 atoms,7x25), K302(5/9 atoms,8x52), E306(5/9 atoms,8x56), R312(5/11 atoms,8x62), S314(5/6 atoms,c-term), R315(5/11 atoms,C-term)
		5ZKQ	2.9	Inactive	ABT-491 (inverse agonist)	F116Y(3x51), N169D(ECL2), A230(6x34), V234A(6x38), D289N(7x49)	M9(5/8 atoms,N-term), D10(5/8 atoms,1x27), R42(5/11 atoms,1x59), F49(5/11 atoms,2x36), Q127(5/9 atoms,34x55), E225(5/9 atoms,6x29), K266(5/9 atoms,7x25)
