# Supplementary material for: Common activation mechanism of class A GPCRs
Source: eLife. 2019 Dec 19;8:e50279. doi: 10.7554/eLife.50279 (PMC6954041; doi:10.7554/eLife.50279)
Supplement: Figure 1—source data 2. [file elife-50279-fig1-data2.xlsx]

## Sheet: Disease-associated mutations
Figure 1-Soure data 2. Disease mutations occurred in class A GPCRs.
Receptor	Residue Number	Wild-type/mutated amino acid	Residue (GPCRdb Numbering)	Variant ID	Associated disease
5HT1A_HUMAN	16	P/L	N-term	rs1800041	Depressive disorder
5HT1A_HUMAN	220	R/L	5x63	rs1800044	Schizophrenia
5HT1B_HUMAN	124	F/S	3x27	rs130060	Headache
5HT2A_HUMAN	25	T/S	N-term	rs1805055	Schizophrenia
5HT2A_HUMAN	25	T/N	N-term	rs1805055	Schizophrenia
5HT2A_HUMAN	452	H/Y	C-term	rs6314	Schizophrenia
5HT2C_HUMAN	23	C/S	N-term	rs6318	Alcoholic intoxication, chronic
5HT5A_HUMAN	15	P/T	N-term	rs11575874	Schizophrenia
5HT5A_HUMAN	15	P/S	N-term	rs11575874	Schizophrenia
ACKR1_human	42	G/D	N-term	rs12075	Duffy blood group system, fya/fyb polymorphism
ACKR1_human	89	R/C	ICL1	rs34599082	Duffy blood group system, fya/fyb polymorphism
ADA1A_HUMAN	347	C/R	C-term	rs1048101	Hypertensive disease
ADRB1_HUMAN	49	S/G	N-term	rs1801252	Hypertensive disease
ADRB1_HUMAN	389	R/G	8x56	rs1801253	Congestive heart failure and beta-blocker response
ADRB2_HUMAN	16	G/R	N-term	rs1042713	Obesity
ADRB2_HUMAN	27	E/Q	1x26	rs1042714	Obesity
ADRB2_HUMAN	164	T/I	4x56	rs1800888	Asthma
ADRB3_HUMAN	64	W/R	1x59	rs4994	Obesity
AGTR1_HUMAN	103	I/F	3x27	rs201745152	Fibrillation
AGTR1_HUMAN	103	I/T	3x27	rs145708722	Fibrillation
AGTR1_HUMAN	163	A/T	4x61	rs12721226	Chronic kidney diseases
AGTR1_HUMAN	244	A/S	6x39	rs12721225	Fibrillation
AGTR1_HUMAN	282	T/M	7x32	rs104893677	Renal dysplasia
CCR2_HUMAN	64	V/I	1x54	rs1799864	Multiple Sclerosis
CCR5_HUMAN	26	K/R	1x28	rs189601230	HIV Infections
CCR5_HUMAN	60	R/S	12x49	rs1800940	HIV Infections
CLTR2_HUMAN	129	L/Q	3x43	--	Uveal melanoma
CLTR2_HUMAN	201	M/V	5x39	rs41347648	Asthma
CNR2_HUMAN	63	Q/R	12x49	rs35761398	Immune thrombocytopenic purpura
CNR2_HUMAN	133	L/I	3x52	rs41311993	Bipolar Disorder
CX3C1_HUMAN	249	V/I	6x53	rs3732379	Crohn Disease
CX3C1_HUMAN	280	T/M	7x39	rs3732378	Crohn Disease
CX3C1_HUMAN	281	V/I	7x40	rs3732379	Crohn Disease
CXCR1_HUMAN	276	S/T	7x23	rs2234671	Hepatitis B
CXCR4_HUMAN	160	V/I	4x49	rs147198552	Melanoma
CXCR4_HUMAN	335	G/S	C-term	rs147214773	--
DRD3_HUMAN	9	S/G	N-term	rs6280	Schizophrenia
DRD3_HUMAN	38	A/V	1x41	rs202132481	Schizophrenia
DRD3_HUMAN	38	A/T	1x41	rs138354054	Schizophrenia
DRD4_HUMAN	194	V/G	5x41	rs1800443	Dopamine receptor d4 polymorphism. insensitive to dopamine and clozapine
EDNRA_HUMAN	129	Y/F	2x53	rs786205230	Mandibulofacial dysostosis with alopecia
EDNRA_HUMAN	303	E/K	6x32	rs876657388	Mandibulofacial dysostosis with alopecia
EDNRB_HUMAN	57	G/S	N-term	rs1801710	Hirschsprung disease 2 (HSCR2)
EDNRB_HUMAN	183	A/G	3x34	rs104894388	Waardenburg syndrome 4A (WS4A)
EDNRB_HUMAN	202	A/D	3x53	--	Waardenburg syndrome 4A (WS4A)
EDNRB_HUMAN	275	W/S	5x41	rs104894389	Hirschsprung disease 2 (HSCR2)
EDNRB_HUMAN	276	W/C	5x42	rs104894387	Waardenburg syndrome 4A (WS4A)
EDNRB_HUMAN	292	F/L	5x57	--	Waardenburg syndrome 4A (WS4A)
EDNRB_HUMAN	305	S/N	5x70	rs5352	Hirschsprung disease 2 (HSCR2)
EDNRB_HUMAN	383	P/L	7x50	--	Hirschsprung disease 2 (HSCR2)
EDNRB_HUMAN	393	F/L	8x50	rs772345263	Waardenburg syndrome 4A (WS4A)
FFAR4_HUMAN	270	R/H	6x26	rs116454156	Obesity
FSHR_HUMAN	128	S/Y	N-term	rs121909665	Ovarian hyperstimulation syndrome (OHSS)
FSHR_HUMAN	160	I/T	N-term	rs121909659	Ovarian dysgenesis 1
FSHR_HUMAN	189	A/V	N-term	rs121909658	Ovarian dysgenesis 1
FSHR_HUMAN	221	V/G	N-term	rs386833514	Ovarian dysgenesis 1
FSHR_HUMAN	224	D/V	N-term	rs386833515	Ovarian dysgenesis 1
FSHR_HUMAN	307	A/P	N-term	rs6165	Ovarian hyperstimulation syndrome (OHSS)
FSHR_HUMAN	307	A/T	N-term	rs6165	Ovarian hyperstimulation syndrome (OHSS)
FSHR_HUMAN	348	P/R	N-term	rs386833510	Ovarian dysgenesis 1
FSHR_HUMAN	419	A/T	2x61	rs121909661	Ovarian dysgenesis 1
FSHR_HUMAN	449	T/I	3x32	rs28928870	Ovarian hyperstimulation syndrome (OHSS)
FSHR_HUMAN	449	T/N	3x32	rs28928870	Ovarian hyperstimulation syndrome (OHSS)
FSHR_HUMAN	449	T/A	3x32	rs121909663	Ovarian hyperstimulation syndrome (OHSS)
FSHR_HUMAN	519	P/T	45x52	rs121909662	Ovarian dysgenesis 1
FSHR_HUMAN	545	I/T	5x54	rs121909664	Ovarian hyperstimulation syndrome (OHSS)
FSHR_HUMAN	567	D/N	6x30	rs28928871	Ovarian hyperstimulation syndrome (OHSS)
FSHR_HUMAN	573	R/C	6x36	rs121909660	Ovarian dysgenesis 1
FSHR_HUMAN	575	A/V	6x30	rs386833511	Ovarian dysgenesis 1
FSHR_HUMAN	587	P/H	6x50	rs386833512	Ovarian dysgenesis 1
FSHR_HUMAN	601	L/V	ECL3	rs386833513	Ovarian dysgenesis 1
FSHR_HUMAN	680	N/S	C-term	rs6166	Ovarian dysgenesis 1
GHSR_HUMAN	204	A/V	ECL2	rs121917883	Short stature, idiopathic, autosomal
GHSR_HUMAN	204	A/E	ECL2	rs121917883	Short stature, idiopathic, autosomal
GHSR_HUMAN	237	R/W	5x63	rs199588904	Short stature, idiopathic, autosomal
GNRHR_HUMAN	10	N/K	N-term	rs104893843	Hypogonadotropic hypogonadism 7 with or without anosmia (HH7)
GNRHR_HUMAN	11	Q/K	N-term	rs776834867	Isolated GnRH Deficiency
GNRHR_HUMAN	32	T/A	N-term	rs515726219	Hypogonadotropic hypogonadism 7 with or without anosmia (HH7)
GNRHR_HUMAN	83	L/V	2x46	--	Hypogonadotropic hypogonadism 7 with or without anosmia (HH7)
GNRHR_HUMAN	90	E/K	2x53	rs104893844	Hypogonadotropic hypogonadism 7 with or without anosmia (HH7)
GNRHR_HUMAN	106	Q/R	23x49	rs104893836	Hypogonadotropic hypogonadism 7 with or without anosmia (HH7)
GNRHR_HUMAN	117	L/R	3x28	rs727505367	Delayed puberty
GNRHR_HUMAN	129	A/G	3x40	rs104893838	Hypogonadotropic hypogonadism 7 with or without anosmia (HH7)
GNRHR_HUMAN	129	A/D	3x40	rs104893838	Hypogonadotropic hypogonadism 7 with or without anosmia (HH7)
GNRHR_HUMAN	129	A/T	3x40	rs772809048	Hypogonadotropic hypogonadism 7 with or without anosmia (HH7)
GNRHR_HUMAN	131	M/T	3x42	rs606231406	Hypogonadotropic hypogonadism 7 with or without anosmia (HH7)
GNRHR_HUMAN	138	D/G	3x49	rs1064793140	--
GNRHR_HUMAN	139	R/H	3x50	rs104893842	Hypogonadotropic hypogonadism 7 with or without anosmia (HH7)
GNRHR_HUMAN	168	S/R	4x54	rs104893840	Hypogonadotropic hypogonadism 7 with or without anosmia (HH7)
GNRHR_HUMAN	171	A/S	4x57	rs74452732	Hypogonadotropic hypogonadism 7 with or without anosmia (HH7)
GNRHR_HUMAN	171	A/T	4x57	rs74452732	Hypogonadotropic hypogonadism 7 with or without anosmia (HH7)
GNRHR_HUMAN	175	L/M	4x62	rs104893839	Hypogonadotropic hypogonadism 7 with or without anosmia (HH7)
GNRHR_HUMAN	217	S/R	5x45	rs104893839	Hypogonadotropic hypogonadism 7 with or without anosmia (HH7)
GNRHR_HUMAN	262	R/Q	6x30	rs104893837	Hypogonadotropic hypogonadism 7 with or without anosmia (HH7)
GNRHR_HUMAN	266	L/R	6x34	rs148499544	Hypogonadotropic hypogonadism 7 with or without anosmia (HH7)
GNRHR_HUMAN	269	T/M	6x37	rs369176613	Hypogonadotropic hypogonadism 7 with or without anosmia (HH7)
GNRHR_HUMAN	281	T/I	6x49	rs515726220	Hypogonadotropic hypogonadism 7 with or without anosmia (HH7)
GNRHR_HUMAN	284	Y/C	6x52	rs28933074	Hypogonadotropic hypogonadism 7 with or without anosmia (HH7)
GNRHR_HUMAN	320	P/L	7x50	rs104893847	Hypogonadotropic hypogonadism 7 with or without anosmia (HH7)
GNRHR_HUMAN	323	Y/C	7x53	--	Hypogonadotropic hypogonadism 7 with or without anosmia (HH7)
GPR35_HUMAN	294	S/R	8x61	rs3749172	Crohn Disease
GPR35_HUMAN	294	S/C	8x61	rs3749172	Crohn Disease
GP101_HUMAN	308	E/D	ICL3	rs73637412	Pituitary adenoma 2, growth hormone-secreting
GP153_HUMAN	73	R/C	ECL1	rs776061422	Childhood-onset schizophrenia
GP161_HUMAN	16	L/Q	N-term	rs200635937	Pituitary stalk interruption syndrome
HRH4_HUMAN	206	H/R	5x70	rs11662595	Breast carcinoma
KISSR_HUMAN	102	L/P	2x63	rs104894703	Hypogonadotropic hypogonadism 8 with or without anosmia (HH8)
KISSR_HUMAN	148	L/S	34x51	rs28939719	Hypogonadotropic hypogonadism 8 with or without anosmia (HH8)
KISSR_HUMAN	194	A/D	ECL2	rs397514699	Hypogonadotropic hypogonadism 8 with or without anosmia (HH8)
KISSR_HUMAN	223	C/R	5x57	--	Hypogonadotropic hypogonadism 8 with or without anosmia (HH8)
KISSR_HUMAN	313	Y/H	7x42	rs587777844	Hypogonadotropic hypogonadism 8 with or without anosmia (HH8)
KISSR_HUMAN	386	R/P	C-term	rs121908499	Hypogonadotropic hypogonadism 8 with or without anosmia (HH8)
LPAR6_HUMAN	63	D/V	2x50	rs879255262	Woolly hair autosomal recessive 1 with or without hypotrichosis (ARWH1)
LPAR6_HUMAN	146	G/R	4x55	rs121434308	Hypotrichosis 8
LPAR6_HUMAN	188	I/F	5x43	rs121434307	Woolly hair autosomal recessive 1 with or without hypotrichosis (ARWH1)
LPAR6_HUMAN	189	E/K	5x44	rs121434309	Woolly hair autosomal recessive 1 with or without hypotrichosis (ARWH1)
LPAR6_HUMAN	196	P/L	5x50	rs115596308	Hypotrichosis 8
LPAR6_HUMAN	196	P/R	5x50	rs115596308	Hypotrichosis 8
LSHR_HUMAN	131	C/R	N-term	rs121912527	Leydig cell hypoplasia
LSHR_HUMAN	144	V/F	N-term	rs121912539	Leydig cell hypoplasia
LSHR_HUMAN	343	C/S	N-term	rs121912536	Leydig cell hypoplasia
LSHR_HUMAN	354	E/K	N-term	rs121912529	Leydig cell hypoplasia
LSHR_HUMAN	368	L/P	1x41	rs121912533	Familial male precocious puberty (FMPP)
LSHR_HUMAN	373	A/V	1x46	rs121912528	Familial male precocious puberty (FMPP)
LSHR_HUMAN	398	M/T	2x43	rs121912526	Familial male precocious puberty (FMPP)
LSHR_HUMAN	457	L/R	3x43	rs121912535	Familial male precocious puberty (FMPP)
LSHR_HUMAN	491	W/R	4x50	rs1064796476	Familial male precocious puberty (FMPP)
LSHR_HUMAN	502	L/P	4x61	rs121912538	Leydig cell hypoplasia
LSHR_HUMAN	542	I/L	5x54	rs121912531	Familial male precocious puberty (FMPP)
LSHR_HUMAN	543	C/R	5x55	rs121912537	Luteinizing hormone resistance (LHR)
LSHR_HUMAN	564	D/G	6x30	rs121912540	Familial male precocious puberty (FMPP)
LSHR_HUMAN	568	A/V	6x34	rs121912534	Familial male precocious puberty (FMPP)
LSHR_HUMAN	571	M/I	6x37	rs121912519	Familial male precocious puberty (FMPP)
LSHR_HUMAN	572	A/V	6x30	rs121912522	Familial male precocious puberty (FMPP)
LSHR_HUMAN	575	I/L	6x41	--	Familial male precocious puberty (FMPP)
LSHR_HUMAN	577	T/I	6x43	rs121912521	Familial male precocious puberty (FMPP)
LSHR_HUMAN	578	D/E	6x44	--	Familial male precocious puberty (FMPP)
LSHR_HUMAN	578	D/G	6x44	rs121912518	Familial male precocious puberty (FMPP)
LSHR_HUMAN	578	D/Y	6x44	rs121912532	Familial male precocious puberty (FMPP)
LSHR_HUMAN	578	D/H	6x44	rs121912532	Familial male precocious puberty (FMPP)
LSHR_HUMAN	578	D/N	6x44	rs121912532	Familial male precocious puberty (FMPP)
LSHR_HUMAN	593	A/P	6x59	rs121912520	Leydig cell hypoplasia
LSHR_HUMAN	616	S/Y	7x46	rs121912525	Leydig cell hypoplasia
LSHR_HUMAN	625	I/K	7x55	rs121912530	Luteinizing hormone resistance (LHR)
MC2R_HUMAN	74	S/I	2x54	rs104894658	Glucocorticoid deficiency 1 (GCCD1)
MC2R_HUMAN	107	D/N	3x29	rs104894661	Glucocorticoid deficiency 1 (GCCD1)
MC2R_HUMAN	120	S/R	3x42	rs104894656	Glucocorticoid deficiency 1 (GCCD1)
MC2R_HUMAN	126	A/S	3x48	rs267607231	Glucocorticoid deficiency 1 (GCCD1)
MC2R_HUMAN	126	A/T	3x48	rs267607231	Glucocorticoid deficiency 1 (GCCD1)
MC2R_HUMAN	128	R/C	3x50	rs104894657	Glucocorticoid deficiency 1 (GCCD1)
MC2R_HUMAN	137	R/W	34x52	rs104894660	Glucocorticoid deficiency 1 (GCCD1)
MC2R_HUMAN	142	V/M	34x57	rs199950178	ACTH resistance
MC2R_HUMAN	251	C/F	7x27	rs104894662	Glucocorticoid deficiency 1 (GCCD1)
MC2R_HUMAN	251	C/S	7x27	rs104894662	Glucocorticoid deficiency 1 (GCCD1)
MC2R_HUMAN	251	C/Y	7x27	rs104894662	Glucocorticoid deficiency 1 (GCCD1)
MC2R_HUMAN	254	Y/C	7x30	rs28940892	Glucocorticoid deficiency 1 (GCCD1)
MC2R_HUMAN	278	F/C	7x55	rs28926182	ACTH-independent Cushing’s syndrome
MC3R_HUMAN	146	I/N	3x54	rs74315393	Body mass index quantitative trait locus 9
MC3R_HUMAN	298	I/T	7x52	rs121913556	Body mass index quantitative trait locus 9
MC3R_HUMAN	298	I/S	7x52	rs121913556	Body mass index quantitative trait locus 9
MC4R_HUMAN	37	D/V	N-term	rs13447325	Obesity
MC4R_HUMAN	50	V/M	1x30	rs121913557	Obesity
MC4R_HUMAN	58	S/C	1x46	rs121913558	Obesity
MC4R_HUMAN	61	E/K	1x49	rs370479598	Obesity
MC4R_HUMAN	62	N/S	1x50	rs121913566	Obesity
MC4R_HUMAN	69	I/R	1x57	rs751160202	Obesity
MC4R_HUMAN	69	I/T	1x57	rs751160202	Obesity
MC4R_HUMAN	90	D/N	2x50	--	Obesity
MC4R_HUMAN	90	D/A	2x50	--	Obesity
MC4R_HUMAN	94	S/N	2x54	rs772213710	Obesity
MC4R_HUMAN	97	N/D	2x57	rs121913565	Obesity
MC4R_HUMAN	98	G/R	2x58	rs2282556	Obesity
MC4R_HUMAN	102	I/S	2x62	rs121913559	Obesity
MC4R_HUMAN	102	I/T	2x62	rs121913559	Obesity
MC4R_HUMAN	125	I/K	3x28		Obesity
MC4R_HUMAN	127	S/L	3x30	rs13447331	Obesity
MC4R_HUMAN	136	S/P	3x39	--	Obesity
MC4R_HUMAN	136	S/F	3x39	--	Obesity
MC4R_HUMAN	137	I/T	3x40	rs151102515	Obesity
MC4R_HUMAN	146	D/N	3x49	rs754646857	Negatively associated with obesity
MC4R_HUMAN	150	T/I	3x53	rs766665118	Obesity
MC4R_HUMAN	165	R/Q	4x41	rs747681609	Obesity
MC4R_HUMAN	170	I/V	4x46	rs121913560	Obesity
MC4R_HUMAN	174	W/C	4x50	--	Obesity
MC4R_HUMAN	175	A/T	4x51	rs121913563	Obesity
MC4R_HUMAN	180	S/P	4x56	rs193922685	Obesity
MC4R_HUMAN	181	G/D	4x57	rs13447333	Obesity
MC4R_HUMAN	219	A/V	5x55	rs121913567	Obesity
MC4R_HUMAN	226	I/T	5x62	rs193922686	Obesity
MC4R_HUMAN	250	L/Q	6x40	rs772393451	Negatively associated with obesity
MC4R_HUMAN	251	I/L	6x41	rs52820871	Negatively associated with obesity
MC4R_HUMAN	252	G/S	6x42	rs13447336	Obesity
MC4R_HUMAN	253	V/I	6x43	rs187152753	Obesity
MC4R_HUMAN	269	I/N	6x59	rs79783591	Obesity
MC4R_HUMAN	271	C/Y	6x61	rs121913562	Obesity
MC4R_HUMAN	271	C/R	6x61	rs1057517991	Obesity
MC4R_HUMAN	274	N/S	ECL3	rs121913561	Obesity
MC4R_HUMAN	298	D/A	7x49	--	Obesity
MC4R_HUMAN	298	D/N	7x49	rs760199460	Obesity
MC4R_HUMAN	299	P/L	7x50	rs52804924	Obesity
MC4R_HUMAN	299	P/H	7x50	rs52804924	Obesity
MC4R_HUMAN	301	I/T	7x52	--	Obesity
MC4R_HUMAN	302	Y/F	7x53	--	Obesity
MC4R_HUMAN	303	A/T	7x54	rs762251697	Obesity
MC4R_HUMAN	316	I/S	8x57	rs121913564	Obesity
MC4R_HUMAN	317	I/T	8x58	rs13447337	Obesity
MC4R_HUMAN	317	I/F	8x58	rs778685158	Obesity
MC4R_HUMAN	317	I/V	8x58	rs778685158	Obesity
MC5R_HUMAN	209	F/L	5x62	rs2236700	Diabetes, type 2
MSHR_HUMAN	60	V/L	1x54	rs1805005	Skin/hair/eye pigmentation 2
MSHR_HUMAN	83	S/P	2x49	rs34474212	Melanoma
MSHR_HUMAN	84	D/E	2x50	rs1805006	Melanoma
MSHR_HUMAN	92	V/M	2x58	rs2228479	Skin/hair/eye pigmentation 2
MSHR_HUMAN	92	V/L	2x58	rs2228479	Skin/hair/eye pigmentation 2
MSHR_HUMAN	151	R/S	34x52	rs1805007	Skin/hair/eye pigmentation 2
MSHR_HUMAN	151	R/G	34x52	rs1805007	Skin/hair/eye pigmentation 2
MSHR_HUMAN	151	R/C	34x52	rs1805007	Skin/hair/eye pigmentation 2
MSHR_HUMAN	157	T/I	4x30	rs104894524	Uv-induced skin damage, susceptibility to
MSHR_HUMAN	159	P/T	4x40	rs104894523	Uv-induced skin damage, susceptibility to
MSHR_HUMAN	159	P/S	4x40	rs104894523	Uv-induced skin damage, susceptibility to
MSHR_HUMAN	160	R/W	4x41	rs1805008	Skin/hair/eye pigmentation 2
MSHR_HUMAN	294	D/N	7x49	rs1805009	Skin/hair/eye pigmentation 2
MSHR_HUMAN	294	D/H	7x49	rs1805009	Skin/hair/eye pigmentation 2
MTR1B_HUMAN	23	S/T	N-term	rs387906779	Diabetes, type 2
MTR1B_HUMAN	42	A/P	1x34	rs387906779	Diabetes, type 2
MTR1B_HUMAN	60	L/Q	1x52	rs141804752	Diabetes, type 2
MTR1B_HUMAN	60	L/R	1x52	rs141804752	Diabetes, type 2
MTR1B_HUMAN	95	P/L	2x59	rs182349376	Diabetes, type 2
MTR1B_HUMAN	138	R/C	3x50	rs61746674	Diabetes, type 2
MTR1B_HUMAN	308	Y/S	7x53	rs184917682	Diabetes, type 2
MTR1B_HUMAN	308	Y/C	7x53	rs184917682	Diabetes, type 2
NK2R_HUMAN	231	G/E	5x72	rs77038916	Asthma
NK2R_HUMAN	375	R/H	C-term	rs2229170	Bronchiolitis, viral
NK3R_HUMAN	93	G/A	1x40	rs121918124	Hypogonadotropic hypogonadism 11 with or without anosmia (HH11)
NK3R_HUMAN	93	G/D	1x40	rs121918124	Hypogonadotropic hypogonadism 11 with or without anosmia (HH11)
NK3R_HUMAN	171	A/S	3x30	rs201195175	Delayed puberty
NK3R_HUMAN	171	A/P	3x30	rs201195175	Delayed puberty
NK3R_HUMAN	231	T/I	ECL2	rs764659822	Hypogonadotropic hypogonadism 11 with or without anosmia (HH11)
NK3R_HUMAN	256	Y/H	5x47	rs397515483	Hypogonadotropic hypogonadism 11 with or without anosmia (HH11)
NK3R_HUMAN	353	P/S	7x50	rs121918125	Hypogonadotropic hypogonadism 11 with or without anosmia (HH11)
NK3R_HUMAN	364	R/Q	8x51	rs150288991	Hypogonadotropic hypogonadism 11 with or without anosmia (HH11)
NPSR1_HUMAN	107	N/I	2x63	rs324981	Asthma
OGR1_HUMAN	74	L/P	2x57	rs1057517672	Amelogenesis imperfecta, hypomaturation type, IIA6
OPRM_HUMAN	6	A/V	N-term	rs1799972	Drug usage
OPRM_HUMAN	40	N/D	N-term	rs1799971	Alcoholic intoxication, chronic
OPRM_HUMAN	88	N/D	1x50	rs1799971	Opioid dependence 1
OPSB_HUMAN	79	G/R	2x49	rs104894031	Tritanopia
OPSB_HUMAN	214	S/A	5x52	rs104894032	Tritanopia
OPSB_HUMAN	214	S/P	5x52	rs104894032	Tritanopia
OPSB_HUMAN	264	P/S	6x50	rs104894033	Tritanopia
OPSD_HUMAN	15	N/S	N-term	rs104893786	Retinitis pigmentosa 4 (RP4)
OPSD_HUMAN	17	T/M	N-term	rs104893769	Retinitis pigmentosa 4 (RP4)
OPSD_HUMAN	23	P/A	N-term	rs104893797	Retinitis pigmentosa 4 (RP4)
OPSD_HUMAN	23	P/H	N-term	rs104893768	Retinitis pigmentosa 4 (RP4)
OPSD_HUMAN	45	F/L	1x40	rs104893770	Retinitis pigmentosa 4 (RP4)
OPSD_HUMAN	51	G/R	1x46	rs104893792	Retinitis pigmentosa 4 (RP4)
OPSD_HUMAN	53	P/R	1x48	rs28933395	Retinitis pigmentosa 4 (RP4)
OPSD_HUMAN	58	T/R	1x53	rs28933394	Retinitis pigmentosa 4 (RP4)
OPSD_HUMAN	58	T/M	1x53	rs28933394	Retinitis pigmentosa 4 (RP4)
OPSD_HUMAN	87	V/D	2x54	rs104893771	Retinitis pigmentosa 4 (RP4)
OPSD_HUMAN	89	G/D	2x551	rs104893772	Retinitis pigmentosa 4 (RP4)
OPSD_HUMAN	90	G/D	2x56	rs104893790	Night blindness, congenital stationary
OPSD_HUMAN	94	T/I	2x60	rs104893796	Night blindness, congenital stationary
OPSD_HUMAN	106	G/R	3x21	rs104893773	Retinitis pigmentosa 4 (RP4)
OPSD_HUMAN	106	G/W	3x21	rs104893773	Retinitis pigmentosa 4 (RP4)
OPSD_HUMAN	110	C/Y	3x25	rs104893787	Retinitis pigmentosa 4 (RP4)
OPSD_HUMAN	114	G/D	3x29	rs104893788	Retinitis pigmentosa 4 (RP4)
OPSD_HUMAN	114	G/A	3x29	rs104893788	Retinitis pigmentosa 4 (RP4)
OPSD_HUMAN	125	L/R	3x40	--	Retinitis pigmentosa 4 (RP4)
OPSD_HUMAN	131	L/P	3x46	--	Retinitis pigmentosa 4 (RP4)
OPSD_HUMAN	135	R/W	3x50	rs104893775	Retinitis pigmentosa 4 (RP4)
OPSD_HUMAN	135	R/Q	3x50	rs104893774	Retinitis pigmentosa 4 (RP4)
OPSD_HUMAN	135	R/G	3x50		Retinitis pigmentosa 4 (RP4)
OPSD_HUMAN	135	R/L	3x50	rs104893774	Retinitis pigmentosa 4 (RP4)
OPSD_HUMAN	150	E/K	4x39	rs104893791	Retinitis pigmentosa 4 (RP4)
OPSD_HUMAN	150	E/Q	4x39	rs104893791	Retinitis pigmentosa 4 (RP4)
OPSD_HUMAN	164	A/E	4x53	rs104893793	Retinitis pigmentosa 4 (RP4)
OPSD_HUMAN	164	A/V	4x53	rs104893793	Retinitis pigmentosa 4 (RP4)
OPSD_HUMAN	171	P/S	4x60	rs104893794	Retinitis pigmentosa 4 (RP4)
OPSD_HUMAN	174	G/S	ECL2	rs527236103	Retinitis pigmentosa 4 (RP4)
OPSD_HUMAN	178	Y/C	ECL2	rs104893776	Retinitis pigmentosa 4 (RP4)
OPSD_HUMAN	181	E/K	ECL2	rs775557680	Retinitis pigmentosa 4 (RP4)
OPSD_HUMAN	181	E/Q	ECL2	rs775557680	Retinitis pigmentosa 4 (RP4)
OPSD_HUMAN	182	G/S	ECL2	rs104893780	Retinitis pigmentosa 4 (RP4)
OPSD_HUMAN	188	G/R	45x51	rs527236100	Retinitis pigmentosa 4 (RP4)
OPSD_HUMAN	190	D/N	ECL2	rs104893779	Retinitis pigmentosa 4 (RP4)
OPSD_HUMAN	190	D/Y	ECL2	rs104893779	Retinitis pigmentosa 4 (RP4)
OPSD_HUMAN	190	D/G	ECL2	rs104893777	Retinitis pigmentosa 4 (RP4)
OPSD_HUMAN	207	M/R	5x43	rs104893782	Retinitis pigmentosa 4 (RP4)
OPSD_HUMAN	211	H/P	5x461	rs28933993	Retinitis pigmentosa 4 (RP4)
OPSD_HUMAN	216	M/R	5x51	rs984572250	Retinitis pigmentosa 4 (RP4)
OPSD_HUMAN	216	M/K	5x51	--	Retinitis pigmentosa 4 (RP4)
OPSD_HUMAN	220	F/C	5x55	rs766161322	Retinitis pigmentosa 4 (RP4)
OPSD_HUMAN	220	F/L	5x55	rs141956356	Retinitis pigmentosa 4 (RP4)
OPSD_HUMAN	222	C/R	5x57	--	Retinitis pigmentosa 4 (RP4)
OPSD_HUMAN	267	P/L	6x50	rs104893781	Retinitis pigmentosa 4 (RP4)
OPSD_HUMAN	292	A/E	7x38	rs104893789	Night blindness, congenital stationary
OPSD_HUMAN	296	K/E	7x42	rs29001653	Retinitis pigmentosa 4 (RP4)
OPSD_HUMAN	345	V/M	C-term	rs104893795	Retinitis pigmentosa 4 (RP4)
OPSD_HUMAN	345	V/L	C-term	rs104893795	Retinitis pigmentosa 4 (RP4)
OPSD_HUMAN	347	P/S	C-term	rs29001637	Retinitis pigmentosa 4 (RP4)
OPSD_HUMAN	347	P/Q	C-term	rs29001566	Retinitis pigmentosa 4 (RP4)
OPSD_HUMAN	347	P/R	C-term	rs29001566	Retinitis pigmentosa 4 (RP4)
OPSD_HUMAN	347	P/L	C-term	rs29001566	Retinitis pigmentosa 4 (RP4)
OPSG_HUMAN	94	N/K	2x45	rs104894915	Colorblindness, partial, deutan series (CBD)
OPSG_HUMAN	177	W/R	4x50	rs267606927	Cone dystrophy 5 (COD5)
OPSG_HUMAN	203	C/R	45x50	rs104894914	Deuteranomaly
OPSG_HUMAN	330	R/Q	8x51	rs104894916	Colorblindness, partial, deutan series (CBD)
OPSR_HUMAN	180	S/A	4x53	rs949431	Red cone polymorphism
OPSR_HUMAN	203	C/R	45x50	rs121434621	Blue cone monochromacy
OPSR_HUMAN	338	G/E	8x59	rs104894913	Colorblindness, protan
OX1R_HUMAN	408	I/V	C-term	rs2271933	Schizophrenia
P2Y12_HUMAN	256	R/Q	6x55	rs121917885	Bleeding disorder
P2Y12_HUMAN	265	R/W	6x64	rs121917886	Bleeding disorder
PI2R_HUMAN	212	R/H	5x65	rs2229131	Atherosclerosis
PKR2_HUMAN	33	Y/H	N-term	rs886037916	Kallmann syndrome 3
PKR2_HUMAN	115	V/M	2x65	rs138672528	Hypogonadotropic hypogonadism 3 with or without anosmia (HH3)
PKR2_HUMAN	85	R/H	12x51	rs74315418	Hypogonadotropic hypogonadism 3 with or without anosmia (HH3)
PKR2_HUMAN	85	R/C	12x51	rs141090506	Hypogonadotropic hypogonadism 3 with or without anosmia (HH3)
PKR2_HUMAN	173	L/R	4x45	rs74315416	Hypogonadotropic hypogonadism 3 with or without anosmia (HH3)
PKR2_HUMAN	178	W/S	4x50	rs201835496	Hypogonadotropic hypogonadism 3 with or without anosmia (HH3)
PKR2_HUMAN	188	S/L	4x61	rs376239580	Hypogonadotropic hypogonadism 3 with or without anosmia (HH3)
PKR2_HUMAN	210	Q/R	45x52	rs74315417	Hypogonadotropic hypogonadism 3 with or without anosmia (HH3)
PKR2_HUMAN	210	Q/P	45x52	rs74315417	Hypogonadotropic hypogonadism 3 with or without anosmia (HH3)
PKR2_HUMAN	248	R/Q	5x63	rs376142095	Hypogonadotropic hypogonadism 3 with or without anosmia (HH3)
PKR2_HUMAN	323	M/I	7x42	rs74315419	Hypogonadotropic hypogonadism 3 with or without anosmia (HH3)
PKR2_HUMAN	334	V/M	7x54	rs371564610	Hypogonadotropic hypogonadism 3 with or without anosmia (HH3)
RXFP2_HUMAN	222	T/P	N-term	rs121918303	Cryptorchidism
RXFP2_HUMAN	222	T/A	N-term	rs121918303	Cryptorchidism
S1PR2_HUMAN	108	R/P	3x28	rs869312749	Deafness, autosomal recessive 68
S1PR2_HUMAN	140	Y/C	34x53	rs869312750	Deafness, autosomal recessive 68
SSR5_HUMAN	48	L/M	1x40	rs4988483	prostate cancer risk
SSR5_HUMAN	109	P/T	3x22	rs4988487	pancreatic cancer risk
SSR5_HUMAN	109	P/S	3x22	rs4988487	pancreatic cancer risk
SSR5_HUMAN	240	R/W	ICL3	rs121917877	Somatostatin analog, resistance to
SSR5_HUMAN	335	P/L	C-term	rs169068	pancreatic cancer risk
TA2R_HUMAN	28	P/S	1x36	rs1131691334	Likely pathogenic
TA2R_HUMAN	60	R/L	ICL1	rs34377097	Bleeding disorder
TA2R_HUMAN	241	V/G	6x31	rs397514542	Bleeding disorder
TA2R_HUMAN	304	D/N	7x49	rs387906691	Bleeding disorder
TSHR_HUMAN	36	C/S	N-term	rs61747482	Congenital hypothyroidism
TSHR_HUMAN	41	D/H	N-term	rs121908869	Hypothyroidism, congenital, non-goitrous, 1 (CHNG1)
TSHR_HUMAN	68	P/S	N-term	rs142063461	Hypothyroidism, congenital, non-goitrous, 1 (CHNG1)
TSHR_HUMAN	83	V/I	N-term	rs201889708	Inborn genetic diseases
TSHR_HUMAN	109	R/Q	N-term	rs121908865	Hypothyroidism, congenital, non-goitrous, 1 (CHNG1)
TSHR_HUMAN	132	G/R	N-term	rs760874290	Congenital hypothyroidism
TSHR_HUMAN	162	P/A	N-term	rs121908863	Hypothyroidism, congenital, non-goitrous, 1 (CHNG1)
TSHR_HUMAN	167	I/N	N-term	rs121908862	Hypothyroidism, congenital, non-goitrous, 1 (CHNG1)
TSHR_HUMAN	183	K/R	N-term	rs121908879	Hyperthyroidism, familial gestational
TSHR_HUMAN	281	S/N	N-term	rs121908873	Hyperthyroidism, non-autoimmune (HTNA)
TSHR_HUMAN	281	S/I	N-term	rs121908873	Hyperthyroidism, non-autoimmune (HTNA)
TSHR_HUMAN	310	R/C	N-term	rs121908882	Hypothyroidism, congenital, non-goitrous, 1 (CHNG1)
TSHR_HUMAN	390	C/W	N-term	rs121908871	Hypothyroidism, congenital, non-goitrous, 1 (CHNG1)
TSHR_HUMAN	410	D/N	1x28	rs121908868	Hypothyroidism, congenital, non-goitrous, 1 (CHNG1)
TSHR_HUMAN	431	G/S	1x49	rs121908883	Hyperthyroidism, non-autoimmune (HTNA)
TSHR_HUMAN	448	V/I	2x30	rs201889708	Inborn genetic diseases
TSHR_HUMAN	450	R/H	2x40	rs189261858	Hypothyroidism, congenital, non-goitrous, 1 (CHNG1)
TSHR_HUMAN	453	M/R	2x43	--	Hyperthyroidism, non-autoimmune (HTNA)
TSHR_HUMAN	453	M/T	2x43	rs121908864	Hyperthyroidism, non-autoimmune (HTNA)
TSHR_HUMAN	467	L/P	2x57	rs121908885	Hypothyroidism, congenital, non-goitrous, 1 (CHNG1)
TSHR_HUMAN	477	T/I	2x67	rs121908881	Hypothyroidism, congenital, non-goitrous, 1 (CHNG1)
TSHR_HUMAN	505	S/N	3x36	rs121908876	Hyperthyroidism, non-autoimmune (HTNA)
TSHR_HUMAN	508	S/L	3x39	rs772490052	Hyperthyroidism, non-autoimmune (HTNA)
TSHR_HUMAN	509	V/A	3x40	rs121908874	Hyperthyroidism, non-autoimmune (HTNA)
TSHR_HUMAN	512	L/E	3x43	--	Hyperthyroidism, non-autoimmune (HTNA)
TSHR_HUMAN	512	L/R	3x43	--	Hyperthyroidism, non-autoimmune (HTNA)
TSHR_HUMAN	512	L/Q	3x43	--	Hyperthyroidism, non-autoimmune (HTNA)
TSHR_HUMAN	519	R/C	3x50	rs756016910	Hypothyroidism, congenital, non-goitrous, 1 (CHNG1)
TSHR_HUMAN	519	R/G	3x50	--	Hypothyroidism, congenital, non-goitrous, 1 (CHNG1)
TSHR_HUMAN	525	F/L	3x56	rs121908870	Hypothyroidism, congenital, non-goitrous, 1 (CHNG1)
TSHR_HUMAN	553	A/T	4x57	rs121908872	Hypothyroidism, congenital, non-goitrous, 1 (CHNG1)
TSHR_HUMAN	553	A/S	4x57	rs121908872	Hypothyroidism, congenital, non-goitrous, 1 (CHNG1)
TSHR_HUMAN	600	C/R	5x57	rs121908884	Hypothyroidism, congenital, non-goitrous, 1 (CHNG1)
TSHR_HUMAN	601	Y/N	5x58	rs1054708	Hyperthyroidism, non-autoimmune (HTNA)
TSHR_HUMAN	619	D/G	6x30	rs121908859	Thyroid adenoma, hyperfunctioning, somatic
TSHR_HUMAN	623	A/I	6x34	rs121908860	Thyroid adenoma, hyperfunctioning, somatic
TSHR_HUMAN	626	M/I	6x37	--	Hyperthyroidism, non-autoimmune (HTNA)
TSHR_HUMAN	629	L/F	6x40	rs121908877	Hyperthyroidism, non-autoimmune (HTNA)
TSHR_HUMAN	630	I/M	6x41	--	Hyperthyroidism, non-autoimmune (HTNA)
TSHR_HUMAN	630	I/L	6x41	--	Hyperthyroidism, non-autoimmune (HTNA)
TSHR_HUMAN	631	F/L	6x42	rs121908861	Hyperthyroidism, non-autoimmune (HTNA)
TSHR_HUMAN	633	D/N	6x44	rs28937584	Hyperthyroidism, non-autoimmune (HTNA)
TSHR_HUMAN	633	D/H	6x44	rs28937584	Hyperthyroidism, non-autoimmune (HTNA)
TSHR_HUMAN	633	D/E	6x44	--	Hyperthyroidism, non-autoimmune (HTNA)
TSHR_HUMAN	633	D/Y	6x44	--	Hyperthyroidism, non-autoimmune (HTNA)
TSHR_HUMAN	633	D/A	6x44	--	Hyperthyroidism, non-autoimmune (HTNA)
TSHR_HUMAN	639	P/S	6x50	rs121908880	Hyperthyroidism, non-autoimmune (HTNA)
TSHR_HUMAN	670	N/S	7x45	--	Hyperthyroidism, non-autoimmune (HTNA)
TSHR_HUMAN	672	C/Y	7x47	rs121908875	Hyperthyroidism, non-autoimmune (HTNA)
TSHR_HUMAN	677	L/V	7x52	--	Hyperthyroidism, non-autoimmune (HTNA)
V1AR_HUMAN	136	F/L	3x37	rs1042615	Diabetes Mellitus
V1BR_HUMAN	65	K/N	12x50	rs35369693	Childhood aggression
V2R_HUMAN	22	K/N	N-term	rs104894748	Nephrogenic diabetes insipidus(NDI)
V2R_HUMAN	39	A/T	1x34	rs104894755	Nephrogenic diabetes insipidus(NDI)
V2R_HUMAN	46	I/K	1x41	rs104894759	Nephrogenic diabetes insipidus(NDI)
V2R_HUMAN	59	L/P	1x54	rs193922112	Nephrogenic diabetes insipidus(NDI)
V2R_HUMAN	80	H/R	2x45	--	Nephrogenic diabetes insipidus(NDI)
V2R_HUMAN	81	L/F	2x46	--	Nephrogenic diabetes insipidus(NDI)
V2R_HUMAN	85	D/N	2x50	rs104894754	Nephrogenic diabetes insipidus(NDI)
V2R_HUMAN	97	L/P	2x62	rs193922113	Nephrogenic diabetes insipidus(NDI)
V2R_HUMAN	104	R/C	23x51	rs104894760	Nephrogenic diabetes insipidus(NDI)
V2R_HUMAN	105	F/V	23x52	rs104894758	Nephrogenic diabetes insipidus(NDI)
V2R_HUMAN	112	C/F	3x25	rs1057518723	Nephrogenic diabetes insipidus(NDI)
V2R_HUMAN	113	R/W	3x26	rs28935496	Nephrogenic diabetes insipidus(NDI)
V2R_HUMAN	126	S/F	3x39	--	Nephrogenic diabetes insipidus(NDI)
V2R_HUMAN	127	S/F	3x40	--	Nephrogenic diabetes insipidus(NDI)
V2R_HUMAN	130	I/L	3x43	--	Nephrogenic diabetes insipidus(NDI)
V2R_HUMAN	130	I/N	3x43	--	Nephrogenic syndrome of inappropriate antidiuresis (N-SIAD)
V2R_HUMAN	130	I/F	3x43	rs796052096	Nephrogenic diabetes insipidus(NDI)
V2R_HUMAN	131	L/P	3x44	rs878853079	Nephrogenic diabetes insipidus(NDI)
V2R_HUMAN	132	A/D	3x45	rs104894747	Nephrogenic diabetes insipidus(NDI)
V2R_HUMAN	137	R/C	3x50	rs104894761	Nephrogenic syndrome of inappropriate antidiuresis (N-SIAD)
V2R_HUMAN	137	R/H	3x50	rs104894756	Nephrogenic diabetes insipidus(NDI)
V2R_HUMAN	137	R/L	3x50	rs104894756	Nephrogenic syndrome of inappropriate antidiuresis (N-SIAD)
V2R_HUMAN	137	R/G	3x50	rs104894761	Nephrogenic diabetes insipidus(NDI)
V2R_HUMAN	164	W/R	4x50	--	Nephrogenic diabetes insipidus(NDI)
V2R_HUMAN	164	W/S	4x50	--	Nephrogenic diabetes insipidus(NDI)
V2R_HUMAN	181	R/C	ECL2	rs104894757	Nephrogenic diabetes insipidus(NDI)
V2R_HUMAN	185	G/C	ECL2	rs104894748	Nephrogenic diabetes insipidus(NDI)
V2R_HUMAN	201	G/D	5x35	rs104894755	Nephrogenic diabetes insipidus(NDI)
V2R_HUMAN	203	R/C	5x37	rs104894750	Nephrogenic diabetes insipidus(NDI)
V2R_HUMAN	205	Y/C	5x39	rs104894749	Nephrogenic diabetes insipidus(NDI)
V2R_HUMAN	229	F/V	5x62	--	Nephrogenic syndrome of inappropriate antidiuresis (N-SIAD)
V2R_HUMAN	273	T/M	6x37	--	Nephrogenic diabetes insipidus(NDI)
V2R_HUMAN	277	V/A	6x41	--	Nephrogenic diabetes insipidus(NDI)
V2R_HUMAN	280	Y/C	6x44	rs104894752	Nephrogenic diabetes insipidus(NDI)
V2R_HUMAN	285	A/P	6x49	rs193922122	Nephrogenic diabetes insipidus(NDI)
V2R_HUMAN	317	N/K	7x45	--	Nephrogenic diabetes insipidus(NDI)
V2R_HUMAN	321	N/K	7x49	rs193922123	Nephrogenic diabetes insipidus(NDI)
V2R_HUMAN	321	N/Y	7x49	--	Nephrogenic diabetes insipidus(NDI)
V2R_HUMAN	321	N/D	7x49	--	Nephrogenic diabetes insipidus(NDI)
V2R_HUMAN	322	P/S	7x50	--	Nephrogenic diabetes insipidus(NDI)
V2R_HUMAN	322	P/H	7x50	--	Nephrogenic diabetes insipidus(NDI)
V2R_HUMAN	322	P/L	7x50	--	Nephrogenic diabetes insipidus(NDI)
V2R_HUMAN	324	I/M	7x52	rs782100915	Nephrogenic diabetes insipidus(NDI)

## Sheet: Data from four databases
	AA coord	Mutations	GPCRdb Numbering	Wiletype residues	Variant ID	vf	Location	Chr: bp	vf_allele	Alleles	gmaf_allele	Global MAF	Class	Source	Evidence	Clin. Sig.	Conseq. Type	sift_sort	sift_class	SIFT	polyphen_sort	polyphen_class	PolyPhen	Transcript
5HT1A_HUMAN	16	P/L	N-term	P16	rs1800041	1242236	5:63961673	5:63961673	A	G/A	A	0.006	SNP	dbSNP	Frequency~1000Genomes~Cited~ExAC		missense variant	181	tolerated - low confidence	0.18	1	benign	0	ENST00000506598.1
5HT1A_HUMAN	220	R/L	5.63x63	R220	rs1800044	1242239	5:63961061	5:63961061	A	C/A	A	0.003	SNP	dbSNP	Frequency~1000Genomes~Cited~ESP~ExAC		missense variant	151	tolerated	0.15	393	benign	0.392	ENST00000323865.4
5HT1B_HUMAN	124	F/S	3.27x27	F124	rs130060	36991	6:77463033	6:77463033	G	A/C/G	C	0.003	SNP	dbSNP	Frequency~HapMap~1000Genomes~Cited~ESP~ExAC		missense variant	1	deleterious	0	91	benign	0.09	ENST00000369947.4
5HT2A_HUMAN	25	T/S	N-term	T25	rs1805055	1246100	13:46895833	13:46895833	C	G/C/T	T	0.016	SNP	dbSNP	Frequency~HapMap~1000Genomes~Cited~ESP~ExAC		missense variant	191	tolerated - low confidence	0.19	1	benign	0	ENST00000378688.8
5HT2A_HUMAN	25	T/N	N-term	T25	rs1805055	1246100	13:46895833	13:46895833	T	G/C/T	T	0.016	SNP	dbSNP	Frequency~HapMap~1000Genomes~Cited~ESP~ExAC		missense variant	71	tolerated - low confidence	0.07	11	benign	0.01	ENST00000378688.8
5HT2A_HUMAN	452	H/Y	C-term	H452	rs6314	6037	13:46834899	13:46834899	A	G/A	A	0.075	SNP	dbSNP	Frequency~HapMap~1000Genomes~Cited~ESP~ExAC		missense variant	231	tolerated	0.23	35	benign	0.034	ENST00000378688.8
5HT2C_HUMAN	23	C/S	N-term	C23	rs6318	6041	X:114731326	X:114731326	G	C/G	C	0.166	SNP	dbSNP	Frequency~HapMap~1000Genomes~Cited~ESP~Phenotype_or_Disease~ExAC	benign	missense variant	281	tolerated - low confidence	0.28	1	benign	0	ENST00000276198.5
5HT5A_HUMAN	15	P/T	N-term	P15	rs11575874	6741228	7:155070942	7:155070942	A	C/A/T	T	0.027	SNP	dbSNP	Frequency~1000Genomes~ESP~ExAC		missense variant	121	tolerated	0.12	1	benign	0	ENST00000287907.2
5HT5A_HUMAN	15	P/S	N-term	P15	rs11575874	6741228	7:155070942	7:155070942	T	C/A/T	T	0.027	SNP	dbSNP	Frequency~1000Genomes~ESP~ExAC		missense variant	521	tolerated	0.52	1	benign	0	ENST00000287907.2
ACKR1_human	42	G/D	N-term	G42	rs12075	11484	1:159205564	1:159205564	A	G/A	G	0.459	SNP	dbSNP	Frequency~HapMap~1000Genomes~Cited~ESP~Phenotype_or_Disease~ExAC	benign	missense variant	891	tolerated	0.89	1	benign	0	ENST00000368121.4
ACKR1_human	89	R/C	ICL1	R89	rs34599082	9599429	1:159205704	1:159205704	T	C/T	T	0.005	SNP	dbSNP	Frequency~1000Genomes~Cited~ESP~Phenotype_or_Disease~ExAC	pathogenic	missense variant	191	tolerated	0.19	686	possibly damaging	0.685	ENST00000368122.3
ADA1A_HUMAN	347	C/R	C-term	C347	rs1048101	759871	8:26770511	8:26770511	G	A/G	A	0.352	SNP	dbSNP	Frequency~HapMap~1000Genomes~Cited~ESP~ExAC		missense variant	711	tolerated	0.71	1	benign	0	ENST00000276393.8
ADRB1_HUMAN	49	S/G	N-term	S49	rs1801252	1243287	10:114044277	10:114044277	G	A/G	G	0.178	SNP	dbSNP	Frequency~HapMap~1000Genomes~Cited~ESP~Phenotype_or_Disease~ExAC	association	missense variant	791	tolerated	0.79	1	benign	0	ENST00000369295.3
ADRB1_HUMAN	389	R/G	8.56x56	R389	rs1801253	1243288	10:114045297	10:114045297	C	G/C	G	0.298	SNP	dbSNP	Frequency~HapMap~1000Genomes~Cited~ESP~Phenotype_or_Disease~ExAC	drug response	missense variant	1001	tolerated	1	1	benign	0	ENST00000369295.3
ADRB2_HUMAN	16	G/R	N-term	G16	rs1042713	755225	5:148826877	5:148826877	A	G/A	A	0.476	SNP	dbSNP	Frequency~HapMap~1000Genomes~Cited~ESP~Phenotype_or_Disease~ExAC	drug response~risk factor	missense variant	171	tolerated	0.17	32	benign	0.031	ENST00000305988.5
ADRB2_HUMAN	27	E/Q	1.26x26	E27	rs1042714	755226	5:148826910	5:148826910	C	G/C/T	G	0.204	SNP	dbSNP	Frequency~HapMap~1000Genomes~Cited~ESP~Phenotype_or_Disease~ExAC	risk factor	missense variant	471	tolerated	0.47	10	benign	0.009	ENST00000305988.5
ADRB2_HUMAN	164	T/I	4.56x56	T164	rs1800888	1243002	5:148827322	5:148827322	T	C/T	T	0.004	SNP	dbSNP	Frequency~HapMap~1000Genomes~Cited~ESP~Phenotype_or_Disease~ExAC	drug response	missense variant	1001	tolerated	1	13	benign	0.012	ENST00000305988.5
ADRB3_HUMAN	64	W/R	1.59x59	W64	rs4994	4745	8:37966280	8:37966280	G	A/G	G	0.115	SNP	dbSNP	Frequency~HapMap~1000Genomes~Cited~ESP~Phenotype_or_Disease~ExAC	risk factor	missense variant	1001	tolerated	1	1	benign	0	ENST00000345060.4
AGTR1_HUMAN	103	I/F	3.27x27	I103	rs201745152	49869941	3:148741342	3:148741342	T	A/T	-		SNP	dbSNP	Frequency~ExAC		missense variant	31	deleterious	0.03	286	benign	0.285	ENST00000349243.7
AGTR1_HUMAN	103	I/T	3.27x27	I103	rs145708722	30532481	3:148741343	3:148741343	C	T/C	C	0	SNP	dbSNP	Frequency~1000Genomes~ESP~Phenotype_or_Disease~ExAC	uncertain significance	missense variant	251	tolerated	0.25	141	benign	0.14	ENST00000349243.7
AGTR1_HUMAN	163	A/T	4.60x61	A163	rs12721226	7773727	3:148741522	3:148741522	A	G/A	A	0.001	SNP	dbSNP	Frequency~1000Genomes~Cited~ExAC		missense variant	1001	tolerated	1	1	benign	0	ENST00000349243.7
AGTR1_HUMAN	244	A/S	6.39x39	T244	rs12721225	7773726	3:148741765	3:148741765	T	G/T	T	0.003	SNP	dbSNP	Frequency~1000Genomes~Cited~ESP~ExAC		missense variant	31	deleterious	0.03	972	probably damaging	0.971	ENST00000349243.7
AGTR1_HUMAN	282	T/M	7.33x32	T282	rs104893677	18789496	3:148741880	3:148741880	T	C/T	-		SNP	dbSNP	Cited~Phenotype_or_Disease	pathogenic	missense variant	1	deleterious	0	990	probably damaging	0.989	ENST00000349243.7
CCR2_HUMAN	64	V/I	1.54x54	V64	rs1799864	1242080	3:46357717	3:46357717	A	G/A	A	0.154	SNP	dbSNP	Frequency~HapMap~1000Genomes~Cited~ESP~Phenotype_or_Disease~ExAC	protective	missense variant	221	tolerated	0.22	128	benign	0.127	ENST00000445132.2
CCR5_HUMAN	26	K/R	1.28x28	K26	rs189601230	44127496	3:46372979	3:46372979	G	A/G	G	0	SNP	dbSNP	Frequency~1000Genomes~ExAC		missense variant	581	tolerated	0.58	4	benign	0.003	ENST00000292303.4
CCR5_HUMAN	60	R/S	12.49x49	S60	rs1800940	1243052	3:46373082	3:46373082	T	G/T	-		SNP	dbSNP	Frequency~Cited~ESP~Phenotype_or_Disease~ExAC	protective	missense variant	21	deleterious	0.02	156	benign	0.155	ENST00000292303.4
CLTR2_HUMAN	201	M/V	5.38x39	M201	rs41347648	10804333	13:48707418	13:48707418	G	A/G	G	0.007	SNP	dbSNP	Frequency~1000Genomes~ESP~ExAC	uncertain significance	missense variant	51	deleterious	0.05	39	benign	0.038	ENST00000282018.4
CNR2_HUMAN	63	Q/R	12.49x49	Q63	rs35761398	10477869	1:23875429	1:23875429-23875430	CC	TT/CC	-		substitution	dbSNP	Cited		missense variant	1001	tolerated	1	1	benign	0	ENST00000374472.4
CNR2_HUMAN	133	L/I	3.52x52	L133	rs41311993	10800610	1:23875221	1:23875221	T	G/T	T	0.003	SNP	dbSNP	Frequency~1000Genomes~Cited~ESP~ExAC		missense variant	901	tolerated	0.9	558	possibly damaging	0.557	ENST00000374472.4
CX3C1_HUMAN	249	V/I	6.53x53	V249	rs3732379	2422411	3:39265765	3:39265765	T	C/T	T	0.144	SNP	dbSNP	Frequency~HapMap~1000Genomes~Cited~ESP~Phenotype_or_Disease~ExAC	pathogenic~risk factor~protective	missense variant	971	tolerated	0.97	19	benign	0.018	ENST00000399220.2
CX3C1_HUMAN	280	T/M	7.40x39	T280	rs3732378	2422410	3:39265671	3:39265671	A	G/A	A	0.085	SNP	dbSNP	Frequency~HapMap~1000Genomes~Cited~ESP~Phenotype_or_Disease~ExAC	pathogenic~risk factor~protective	missense variant	11	deleterious	0.01	87	benign	0.086	ENST00000542107.5
CX3C1_HUMAN	281	V/I	7.41x40	V282	rs3732379	2422411	3:39265765	3:39265765	T	C/T	T	0.144	SNP	dbSNP	Frequency~HapMap~1000Genomes~Cited~ESP~Phenotype_or_Disease~ExAC	pathogenic~risk factor~protective	missense variant	1001	tolerated	1	27	benign	0.026	ENST00000358309.3
CXCR1_HUMAN	276	S/T	7.24x23	S276	rs2234671	1637330	2:218164385	2:218164385	G	C/G	G	0.144	SNP	dbSNP	Frequency~HapMap~1000Genomes~Cited~ESP~ExAC		missense variant	1001	tolerated	1	4	benign	0.003	ENST00000295683.2
CXCR4_HUMAN	160	V/I	4.49x49	V160	rs147198552	31772580	2:136115450	2:136115450	T	C/T	-		SNP	dbSNP	Frequency~ESP~ExAC		missense variant	71	tolerated	0.07	973	probably damaging	0.972	ENST00000241393.3
CXCR4_HUMAN	335	G/S	C-term	G335	rs147214773	31785987	2:136114925	2:136114925	T	C/T	-		SNP	dbSNP	Frequency~ESP~ExAC	likely pathogenic	missense variant	241	tolerated	0.24	25	benign	0.024	ENST00000241393.3
DRD3_HUMAN	9	S/G	N-term	S9	rs6280	6003	3:114171968	3:114171968	T	C/T	C	0.486	SNP	dbSNP	Frequency~HapMap~1000Genomes~Cited~ESP~Phenotype_or_Disease~ExAC	likely benign~risk factor	missense variant	1001	tolerated - low confidence	1	1	benign	0	ENST00000295881.9
DRD3_HUMAN	38	A/V	1.41x41	A38	rs202132481	50220849	3:114171880	3:114171880	A	G/A	A	0	SNP	dbSNP	Frequency~1000Genomes~ExAC		missense variant	91	tolerated	0.09	1	benign	0	ENST00000295881.9
DRD3_HUMAN	38	A/T	1.41x41	A38	rs138354054	24389505	3:114171881	3:114171881	T	C/T	T	0.004	SNP	dbSNP	Frequency~1000Genomes~ESP~ExAC		missense variant	91	tolerated	0.09	1	benign	0	ENST00000295881.9
DRD4_HUMAN	194	V/G	5.40x41	V194	rs1800443	1242610	11:639830	11:639830	G	T/G	G	0.014	SNP	dbSNP	Frequency~HapMap~1000Genomes~Cited~ESP~Phenotype_or_Disease~ExAC	benign	missense variant	1	deleterious	0	446	benign	0.445	ENST00000176183.5
EDNRA_HUMAN	129	Y/F	2.53x53	Y129	rs786205230	148300897	4:147486067	4:147486067	T	A/T	-		SNP	dbSNP	Cited~Phenotype_or_Disease	pathogenic	missense variant	91	tolerated	0.09	307	benign	0.306	ENST00000324300.9
EDNRA_HUMAN	303	E/K	6.32x32	E303	rs876657388	152459092	4:147539823	4:147539823	A	G/A	-		SNP	dbSNP	Cited~Phenotype_or_Disease	pathogenic	missense variant	11	deleterious	0.01	920	probably damaging	0.919	ENST00000324300.9
EDNRB_HUMAN	57	G/S	N-term	G57	rs1801710	1243559	13:77918405	13:77918405	T	C/T	T	0.002	SNP	dbSNP	Frequency~1000Genomes~Cited~ESP~Phenotype_or_Disease~ExAC	uncertain significance~likely benign~risk factor	missense variant	611	tolerated	0.61	6	benign	0.005	ENST00000646948.1
EDNRB_HUMAN	183	A/G	3.34x34	A183	rs104894388	18790159	13:77903543	13:77903543	C	G/C	-		SNP	dbSNP	Cited~Phenotype_or_Disease	pathogenic	missense variant	31	deleterious	0.03	331	benign	0.33	ENST00000646948.1
EDNRB_HUMAN	275	W/S	5.40x41	W275	rs104894389	18790160	13:77901185	13:77901185	G	C/G/T	-		SNP	dbSNP	Frequency~Cited~Phenotype_or_Disease~ExAC	risk factor	missense variant	1	deleterious	0	995	probably damaging	0.994	ENST00000646948.1
EDNRB_HUMAN	276	W/C	5.41x42	W276	rs104894387	18790158	13:77901181	13:77901181	A	C/A	-		SNP	dbSNP	Frequency~Cited~ESP~Phenotype_or_Disease	pathogenic~risk factor	missense variant	1	deleterious	0	996	probably damaging	0.995	ENST00000646948.1
EDNRB_HUMAN	305	S/N	5.70x70	S305	rs5352	5091	13:77901095	13:77901095	T	C/T	T	0.005	SNP	dbSNP	Frequency~HapMap~1000Genomes~Cited~ESP~Phenotype_or_Disease~ExAC	benign~likely benign~risk factor	missense variant	1001	tolerated	1	7	benign	0.006	ENST00000334286.7
FFAR4_HUMAN	270	R/H	6.25x26	R270	rs116454156	23080208	10:93587284	10:93587284	A	G/A	A	0.015	SNP	dbSNP	Frequency~1000Genomes~Cited~ESP~Phenotype_or_Disease~ExAC	risk factor	missense variant	71	tolerated	0.07	23	benign	0.022	ENST00000371483.8
FSHR_HUMAN	128	S/Y	N-term	S128	rs121909665	23966569	2:48990629	2:48990629	T	G/T	-		SNP	dbSNP	Cited~Phenotype_or_Disease	pathogenic	missense variant	51	deleterious	0.05	1001	probably damaging	1	ENST00000454032.5
FSHR_HUMAN	160	I/T	N-term	I160	rs121909659	23966563	2:48989022	2:48989022	G	A/G	-		SNP	dbSNP	Frequency~Cited~Phenotype_or_Disease~ExAC	likely pathogenic~pathogenic	missense variant	1	deleterious	0	975	probably damaging	0.974	ENST00000406846.6
FSHR_HUMAN	189	A/V	N-term	A189	rs121909658	23966562	2:48983125	2:48983125	A	G/A	-		SNP	dbSNP	Frequency~Cited~Phenotype_or_Disease~ExAC	pathogenic	missense variant	1	deleterious	0	1000	probably damaging	0.999	ENST00000406846.6
FSHR_HUMAN	221	V/G	N-term	V221	rs386833514	59528947	2:48982918	2:48982918	C	A/C	-		SNP	dbSNP	Cited~Phenotype_or_Disease	likely pathogenic	missense variant	391	tolerated	0.39	21	benign	0.02	ENST00000454032.5
FSHR_HUMAN	224	D/V	N-term	D224	rs386833515	59528948	2:48968881	2:48968881	A	T/A	-		SNP	dbSNP	Cited~Phenotype_or_Disease	likely pathogenic	missense variant~splice region variant	1	deleterious	0	997	probably damaging	0.996	ENST00000406846.6
FSHR_HUMAN	307	A/P	n-term	A307	rs6165	5893	2:48963902	2:48963902	G	C/G/T	T	0.492	SNP	dbSNP	Frequency~HapMap~1000Genomes~Cited~ESP~Phenotype_or_Disease~ExAC	benign~drug response	missense variant	311	tolerated	0.31	1	benign	0	ENST00000406846.6
FSHR_HUMAN	307	A/T	n-term	A307	rs6165	5893	2:48963902	2:48963902	T	C/G/T	T	0.492	SNP	dbSNP	Frequency~HapMap~1000Genomes~Cited~ESP~Phenotype_or_Disease~ExAC	benign~drug response	missense variant	531	tolerated	0.53	6	benign	0.005	ENST00000406846.6
FSHR_HUMAN	348	P/R	N-term	P348	rs386833510	59528943	2:48963778	2:48963778	C	G/C	-		SNP	dbSNP	Frequency~Cited~Phenotype_or_Disease~ExAC	likely pathogenic	missense variant	1	deleterious	0	972	probably damaging	0.971	ENST00000406846.6
FSHR_HUMAN	419	A/T	2.61x61	A419	rs121909661	23966565	2:48963566	2:48963566	T	C/T	-		SNP	dbSNP	Frequency~Cited~Phenotype_or_Disease~ExAC	pathogenic	missense variant	1	deleterious	0	1000	probably damaging	0.999	ENST00000406846.6
FSHR_HUMAN	449	T/I	3.32x32	T449	rs28928870	9110181	2:48963475	2:48963475	A	G/A/T	-		SNP	dbSNP	Frequency~Cited~Phenotype_or_Disease~ExAC	pathogenic	missense variant	1	deleterious	0	1001	probably damaging	1	ENST00000406846.6
FSHR_HUMAN	449	T/N	3.32x32	T449	rs28928870	9110181	2:48963475	2:48963475	T	G/A/T	-		SNP	dbSNP	Frequency~Cited~Phenotype_or_Disease~ExAC	pathogenic	missense variant	1	deleterious	0	1001	probably damaging	1	ENST00000406846.6
FSHR_HUMAN	449	T/A	3.32x32	T449	rs121909663	23966567	2:48963476	2:48963476	C	T/C	-		SNP	dbSNP	Cited~Phenotype_or_Disease	pathogenic	missense variant	11	deleterious	0.01	1000	probably damaging	0.999	ENST00000406846.6
FSHR_HUMAN	519	P/T	45.52x52	P519	rs121909662	23966566	2:48963266	2:48963266	T	G/T	-		SNP	dbSNP	Cited~Phenotype_or_Disease	pathogenic	missense variant	1	deleterious	0	1001	probably damaging	1	ENST00000406846.6
FSHR_HUMAN	545	I/T	5.54x54	I545	rs121909664	23966568	2:48963187	2:48963187	G	A/G	-		SNP	dbSNP	Frequency~Cited~Phenotype_or_Disease~ExAC	pathogenic	missense variant	1	deleterious	0	857	possibly damaging	0.856	ENST00000406846.6
FSHR_HUMAN	567	D/N	6.30x30	D567	rs28928871	9110182	2:48963122	2:48963122	T	C/T	-		SNP	dbSNP	Cited~Phenotype_or_Disease	pathogenic	missense variant	1	deleterious	0	1001	probably damaging	1	ENST00000406846.6
FSHR_HUMAN	573	R/C	6.36x36	R573	rs121909660	23966564	2:48963104	2:48963104	A	G/A	-		SNP	dbSNP	Frequency~Cited~Phenotype_or_Disease~ExAC	pathogenic	missense variant	1	deleterious	0	1001	probably damaging	1	ENST00000406846.6
FSHR_HUMAN	575	A/V	6.38x38	A575	rs386833511	59528944	2:48963097	2:48963097	A	G/A	-		SNP	dbSNP	Cited~Phenotype_or_Disease	likely pathogenic	missense variant	1	deleterious	0	959	probably damaging	0.958	ENST00000406846.6
FSHR_HUMAN	587	P/H	6.50x50	P587	rs386833512	59528945	2:48963061	2:48963061	T	G/T	-		SNP	dbSNP	Cited~Phenotype_or_Disease		missense variant	1	deleterious	0	1001	probably damaging	1	ENST00000406846.6
FSHR_HUMAN	601	L/V	ECL3	L601	rs386833513	59528946	2:48963020	2:48963020	C	G/C	-		SNP	dbSNP	Cited~Phenotype_or_Disease	likely pathogenic	missense variant	1	deleterious	0	1000	probably damaging	0.999	ENST00000406846.6
FSHR_HUMAN	680	N/S	C-term	N680	rs6166	5894	2:48962782	2:48962782	T	C/T	C	0.407	SNP	dbSNP	Frequency~HapMap~1000Genomes~Cited~ESP~Phenotype_or_Disease~ExAC	benign~drug response	missense variant	761	tolerated	0.76	1	benign	0	ENST00000406846.6
GHSR_HUMAN	204	A/V	ECL2	A204	rs121917883	23968010	3:172447803	3:172447803	A	G/A/T	-		SNP	dbSNP	Frequency~Cited~Phenotype_or_Disease~ExAC	pathogenic	missense variant	111	tolerated	0.11	995	probably damaging	0.994	ENST00000427970.1
GHSR_HUMAN	204	A/E	ECL2	A204	rs121917883	23968010	3:172447803	3:172447803	T	G/A/T	-		SNP	dbSNP	Frequency~Cited~Phenotype_or_Disease~ExAC	pathogenic	missense variant	1	deleterious	0	999	probably damaging	0.998	ENST00000427970.1
GHSR_HUMAN	237	R/W	5.63x63	R237	rs199588904	47910146	3:172447705	3:172447705	A	T/A	A	0	SNP	dbSNP	Frequency~1000Genomes~Cited~ESP~Phenotype_or_Disease~ExAC		missense variant	1	deleterious	0	1001	probably damaging	1	ENST00000241256.2
GNRHR_HUMAN	10	N/K	N-term	N10	rs104893843	18789654	4:67754306	4:67754306	T	A/T	-		SNP	dbSNP	Frequency~Cited~Phenotype_or_Disease~ExAC	likely pathogenic~pathogenic	missense variant	851	tolerated	0.85	1	benign	0	ENST00000226413.4
GNRHR_HUMAN	11	Q/K	N-term	Q11	rs776834867	142387947	4:67754305	4:67754305	T	G/T	-		SNP	dbSNP	Frequency~Cited~Phenotype_or_Disease~ExAC	likely pathogenic	missense variant	511	tolerated	0.51	15	benign	0.014	ENST00000420975.2
GNRHR_HUMAN	32	T/A	N-term	T32	rs515726219	59850638	4:67754242	4:67754242	C	T/C	C	0	SNP	dbSNP	Frequency~1000Genomes~Cited~Phenotype_or_Disease~ExAC	pathogenic	missense variant	1	deleterious	0	557	possibly damaging	0.556	ENST00000226413.4
GNRHR_HUMAN	90	E/K	2.53x53	E90	rs104893844	18789655	4:67754068	4:67754068	T	C/T	-		SNP	dbSNP	Frequency~Cited~Phenotype_or_Disease~ExAC	pathogenic	missense variant	51	deleterious	0.05	995	probably damaging	0.994	ENST00000420975.2
GNRHR_HUMAN	106	Q/R	23.49x49	Q106	rs104893836	18789647	4:67754019	4:67754019	C	T/C	C	0.001	SNP	dbSNP	Frequency~1000Genomes~Cited~ESP~Phenotype_or_Disease~ExAC	pathogenic	missense variant	1	deleterious	0	993	probably damaging	0.992	ENST00000226413.4
GNRHR_HUMAN	117	L/R	3.28x28	L117	rs727505367	110862424	4:67753986	4:67753986	C	A/C	-		SNP	dbSNP	Cited~Phenotype_or_Disease	likely pathogenic	missense variant	1	deleterious	0	899	possibly damaging	0.898	ENST00000226413.4
GNRHR_HUMAN	129	A/G	3.40x40	A129	rs104893838	18789649	4:67753950	4:67753950	C	G/C/T	-		SNP	dbSNP	Frequency~Cited~Phenotype_or_Disease~ExAC	pathogenic	missense variant	1	deleterious	0	999	probably damaging	0.998	ENST00000226413.4
GNRHR_HUMAN	129	A/D	3.40x40	A129	rs104893838	18789649	4:67753950	4:67753950	T	G/C/T	-		SNP	dbSNP	Frequency~Cited~Phenotype_or_Disease~ExAC	pathogenic	missense variant	1	deleterious	0	1000	probably damaging	0.999	ENST00000226413.4
GNRHR_HUMAN	129	A/T	3.40x40	A129	rs772809048	138359394	4:67753951	4:67753951	T	C/T	-		SNP	dbSNP	Frequency~ExAC		missense variant	1	deleterious	0	1000	probably damaging	0.999	ENST00000226413.4
GNRHR_HUMAN	131	M/T	3.42x42	M131	rs606231406	110859403	4:67753944	4:67753944	G	A/G	-		SNP	dbSNP	Cited~Phenotype_or_Disease	pathogenic	missense variant	1	deleterious	0	986	probably damaging	0.985	ENST00000226413.4
GNRHR_HUMAN	138	D/G	3.49x49	D138	rs1064793140	340546179	4:67753923	4:67753923	C	T/C	-		sequence alteration	ClinVar		likely pathogenic	missense variant	1	deleterious	0	1000	probably damaging	0.999	ENST00000226413.4
GNRHR_HUMAN	139	R/H	3.50x50	R139	rs104893842	18789653	4:67753920	4:67753920	T	C/T	-		SNP	dbSNP	Frequency~Cited~ESP~Phenotype_or_Disease~ExAC	pathogenic	missense variant	1	deleterious	0	1000	probably damaging	0.999	ENST00000226413.4
GNRHR_HUMAN	168	S/R	4.54x54	S168	rs104893840	18789651	4:67753832	4:67753832	T	A/T	-		SNP	dbSNP	Cited~Phenotype_or_Disease	pathogenic	missense variant	171	tolerated	0.17	208	benign	0.207	ENST00000226413.4
GNRHR_HUMAN	171	A/S	4.57x57	A171	rs74452732	14853044	4:67753825	4:67753825	A	C/A/T	-		SNP	dbSNP	Frequency~Cited~ESP~Phenotype_or_Disease~ExAC	pathogenic	missense variant	271	tolerated	0.27	293	benign	0.292	ENST00000420975.2
GNRHR_HUMAN	171	A/T	4.57x57	A171	rs74452732	14853044	4:67753825	4:67753825	T	C/A/T	-		SNP	dbSNP	Frequency~Cited~ESP~Phenotype_or_Disease~ExAC	pathogenic	missense variant	21	deleterious	0.02	862	possibly damaging	0.861	ENST00000420975.2
GNRHR_HUMAN	175	L/M	4.61x62	L175	rs104893839	18789650	4:67744659	4:67744659	T	G/T	-		SNP	dbSNP	Cited~Phenotype_or_Disease	pathogenic	missense variant~splice region variant	121	tolerated	0.12	932	probably damaging	0.931	ENST00000420975.2
GNRHR_HUMAN	217	S/R	5.44x45	S217	rs104893839	18789650	4:67744659	4:67744659	T	G/T	-		SNP	dbSNP	Cited~Phenotype_or_Disease	pathogenic	missense variant	351	tolerated	0.35	328	benign	0.327	ENST00000226413.4
GNRHR_HUMAN	262	R/Q	6.30x30	R262	rs104893837	18789648	4:67740682	4:67740682	T	C/T	T	0.001	SNP	dbSNP	Frequency~1000Genomes~Cited~ESP~Phenotype_or_Disease~ExAC	pathogenic	missense variant	1	deleterious	0	999	probably damaging	0.998	ENST00000226413.4
GNRHR_HUMAN	266	L/R	6.34x34	L266	rs148499544	32854502	4:67740670	4:67740670	C	A/C	-		SNP	dbSNP	Frequency~ESP~ExAC		missense variant	1	deleterious	0	1001	probably damaging	1	ENST00000226413.4
GNRHR_HUMAN	269	T/M	6.37x37	T269	rs369176613	51795617	4:67740661	4:67740661	A	G/A	-		SNP	dbSNP	Frequency~Cited~ESP~Phenotype_or_Disease~ExAC	pathogenic	missense variant	1	deleterious	0	981	probably damaging	0.98	ENST00000226413.4
GNRHR_HUMAN	281	T/I	6.49x49	T281	rs515726220	59850639	4:67740625	4:67740625	A	G/A	-		SNP	dbSNP	Cited~Phenotype_or_Disease	pathogenic	missense variant	1	deleterious	0	1000	probably damaging	0.999	ENST00000226413.4
GNRHR_HUMAN	284	Y/C	6.52x52	Y284	rs28933074	9110353	4:67740616	4:67740616	C	T/C	-		SNP	dbSNP	Frequency~Cited~Phenotype_or_Disease~ExAC	pathogenic	missense variant	1	deleterious	0	1001	probably damaging	1	ENST00000226413.4
GNRHR_HUMAN	320	P/L	7.50x50	P320	rs104893847	18789657	4:67740508	4:67740508	A	G/A	-		SNP	dbSNP	Cited~Phenotype_or_Disease	pathogenic	missense variant	1	deleterious	0	1000	probably damaging	0.999	ENST00000226413.4
GPR35_HUMAN	294	S/R	8.61x61	S294	rs3749172	2434361	2:240630832	2:240630832	C	A/C/T	A	0.484	SNP	dbSNP	Frequency~HapMap~1000Genomes~Cited~ESP~ExAC		missense variant	601	tolerated	0.6	1	benign	0	ENST00000319838.9
GPR35_HUMAN	294	S/C	8.61x61	S294	rs3749172	2434361	2:240630832	2:240630832	T	A/C/T	A	0.484	SNP	dbSNP	Frequency~HapMap~1000Genomes~Cited~ESP~ExAC		missense variant	51	tolerated	0.05	188	benign	0.187	ENST00000319838.9
GP101_HUMAN	308	E/D	E308	ICL3	rs73637412	14407767	X:137030751	X:137030751	G	C/G/T	-		SNP	dbSNP	Frequency~1000Genomes~Cited~ESP~Phenotype_or_Disease~ExAC	likely benign~pathogenic	missense variant	271	tolerated - low confidence	0.27	4	benign	0.003	ENST00000298110.1
GP153_HUMAN	73	R/C	ECL1	R73	rs776061422	141613961	1:6254689	1:6254689	A	G/A	-		SNP	dbSNP	Frequency~Cited~Phenotype_or_Disease~ExAC	likely pathogenic	missense variant	11	deleterious	0.01	946	probably damaging	0.945	ENST00000377893.2
GP161_HUMAN	16	L/Q	N-term	L16	rs200635937	48862851	1:168104855	1:168104855	T	A/T	T	0.004	SNP	dbSNP	Frequency~1000Genomes~Cited~Phenotype_or_Disease~ExAC	uncertain significance~likely pathogenic	missense variant	51	tolerated - low confidence	0.05	957	probably damaging	0.956	ENST00000271357.9
HRH4_HUMAN	206	H/R	5.70x70	H206	rs11662595	6824095	18:24477006	18:24477006	G	A/G	G	0.063	SNP	dbSNP	Frequency~HapMap~1000Genomes~Cited~ESP~ExAC		missense variant	1001	tolerated	1	1	benign	0	ENST00000256906.4
KISSR_HUMAN	102	L/P	2.64x63	L102	rs104894703	18790451	19:918604	19:918604	C	T/C	-		SNP	dbSNP	Frequency~Cited~Phenotype_or_Disease~ExAC	pathogenic	missense variant	11	deleterious	0.01	854	possibly damaging	0.853	ENST00000234371.9
KISSR_HUMAN	148	L/S	34.51x51	L148	rs28939719	9110773	19:919563	19:919563	C	T/C	-		SNP	dbSNP	Cited~Phenotype_or_Disease	pathogenic	missense variant	1	deleterious	0	970	probably damaging	0.969	ENST00000234371.9
KISSR_HUMAN	194	A/D	ECL2	A194	rs397514699	59533695	19:919949	19:919949	A	C/A	-		SNP	dbSNP	Frequency~Cited~Phenotype_or_Disease~ExAC	risk factor	missense variant	431	tolerated	0.43	39	benign	0.038	ENST00000234371.9
KISSR_HUMAN	313	Y/H	7.43x42	Y313	rs587777844	110852662	19:920488	19:920488	C	T/C	-		SNP	dbSNP	Frequency~Cited~Phenotype_or_Disease~ExAC	pathogenic	missense variant	1	deleterious	0	1001	probably damaging	1	ENST00000234371.9
KISSR_HUMAN	386	R/P	C-term	R386	rs121908499	23965584	19:920708	19:920708	C	G/C	C	0.001	SNP	dbSNP	Frequency~1000Genomes~Cited~Phenotype_or_Disease~ExAC	likely pathogenic~pathogenic	missense variant	31	deleterious - low confidence	0.03	55	benign	0.054	ENST00000234371.9
LPAR6_HUMAN	63	D/V	2.50x50	D63	rs879255262	152853821	13:48412236	13:48412236	A	T/A	-		SNP	dbSNP	Cited~Phenotype_or_Disease	pathogenic	missense variant	1	deleterious	0	1001	probably damaging	1	ENST00000345941.2
LPAR6_HUMAN	146	G/R	4.55x55	G146	rs121434308	23964695	13:48411988	13:48411988	T	C/T	-		SNP	dbSNP	Frequency~Cited~Phenotype_or_Disease~ExAC		missense variant	211	tolerated	0.21	853	possibly damaging	0.852	ENST00000345941.2
LPAR6_HUMAN	188	I/F	5.42x43	I188	rs121434307	23964694	13:48411862	13:48411862	A	T/A	-		SNP	dbSNP	Frequency~Cited~Phenotype_or_Disease~ExAC	pathogenic	missense variant	11	deleterious	0.01	990	probably damaging	0.989	ENST00000620633.4
LPAR6_HUMAN	189	E/K	5.43x44	E189	rs121434309	23964696	13:48411859	13:48411859	T	C/T	-		SNP	dbSNP	Frequency~Cited~Phenotype_or_Disease~ExAC	pathogenic	missense variant	1	deleterious	0	1001	probably damaging	1	ENST00000345941.2
LPAR6_HUMAN	196	P/L	5.50x50	P196	rs115596308	22471689	13:48411837	13:48411837	A	G/A/C	A	0	SNP	dbSNP	Frequency~1000Genomes~Cited~Phenotype_or_Disease~ExAC	pathogenic	missense variant	1	deleterious	0	1001	probably damaging	1	ENST00000620633.4
LPAR6_HUMAN	196	P/R	5.50x50	P196	rs115596308	22471689	13:48411837	13:48411837	C	G/A/C	A	0	SNP	dbSNP	Frequency~1000Genomes~Cited~Phenotype_or_Disease~ExAC	pathogenic	missense variant	1	deleterious	0	1001	probably damaging	1	ENST00000620633.4
LSHR_HUMAN	131	C/R	N-term	C131	rs121912527	23966821	2:48723689	2:48723689	G	A/G	-		SNP	dbSNP	Cited~Phenotype_or_Disease	pathogenic	missense variant	351	tolerated	0.35	667	possibly damaging	0.666	ENST00000405626.5
LSHR_HUMAN	144	V/F	n-term	V144	rs121912539	23966833	2:48723650	2:48723650	A	C/A/T	T	0	SNP	dbSNP	Frequency~1000Genomes~Cited~ESP~Phenotype_or_Disease~ExAC	likely benign~pathogenic	missense variant	1	deleterious	0	218	benign	0.217	ENST00000405626.5
LSHR_HUMAN	343	C/S	N-term	C343	rs121912536	23966830	2:48688770	2:48688770	T	A/T	-		SNP	dbSNP	Cited~Phenotype_or_Disease	pathogenic	missense variant	1	deleterious	0	990	probably damaging	0.989	ENST00000294954.11
LSHR_HUMAN	354	E/K	N-term	E354	rs121912529	23966823	2:48688737	2:48688737	T	C/T	-		SNP	dbSNP	Cited~Phenotype_or_Disease	pathogenic	missense variant	1	deleterious	0	938	probably damaging	0.937	ENST00000294954.11
LSHR_HUMAN	368	L/P	1.41x41	L368	rs121912533	23966827	2:48688694	2:48688694	G	A/G	-		SNP	dbSNP	Cited~Phenotype_or_Disease	pathogenic	missense variant	1	deleterious	0	852	possibly damaging	0.851	ENST00000294954.11
LSHR_HUMAN	373	A/V	1.46x46	A373	rs121912528	23966822	2:48688679	2:48688679	A	G/A	-		SNP	dbSNP	Cited~Phenotype_or_Disease	pathogenic	missense variant	1	deleterious	0	994	probably damaging	0.993	ENST00000294954.11
LSHR_HUMAN	398	M/T	2.43x43	M398	rs121912526	23966820	2:48688604	2:48688604	G	A/G	-		SNP	dbSNP	Cited~Phenotype_or_Disease	pathogenic	missense variant	1	deleterious	0	909	possibly damaging	0.908	ENST00000294954.11
LSHR_HUMAN	457	L/R	3.43x43	L457	rs121912535	23966829	2:48688427	2:48688427	C	A/C	-		SNP	dbSNP	Cited~Phenotype_or_Disease	pathogenic	missense variant	1	deleterious	0	1000	probably damaging	0.999	ENST00000294954.11
LSHR_HUMAN	491	W/R	4.50x50	W491	rs1064796476	340548522	2:48688326	2:48688326	G	A/G	-		sequence alteration	ClinVar		likely pathogenic	missense variant	1	deleterious	0	1000	probably damaging	0.999	ENST00000294954.11
LSHR_HUMAN	502	L/P	4.61x61	L502	rs121912538	23966832	2:48688292	2:48688292	G	A/G	-		SNP	dbSNP	Cited~Phenotype_or_Disease	pathogenic	missense variant	1	deleterious	0	1001	probably damaging	1	ENST00000294954.11
LSHR_HUMAN	542	I/L	5.54x54	I542	rs121912531	23966825	2:48688173	2:48688173	G	T/G	-		SNP	dbSNP	Cited~Phenotype_or_Disease	pathogenic	missense variant	1	deleterious	0	987	probably damaging	0.986	ENST00000294954.11
LSHR_HUMAN	543	C/R	5.55x55	C543	rs121912537	23966831	2:48688170	2:48688170	G	A/G	-		SNP	dbSNP	Cited~Phenotype_or_Disease	pathogenic	missense variant	1	deleterious	0	1000	probably damaging	0.999	ENST00000294954.11
LSHR_HUMAN	564	D/G	6.30x30	D564	rs121912540	23966834	2:48688106	2:48688106	C	T/C	-		SNP	dbSNP	Cited~Phenotype_or_Disease	pathogenic	missense variant	1	deleterious	0	1000	probably damaging	0.999	ENST00000294954.11
LSHR_HUMAN	568	A/V	6.34x34	A568	rs121912534	23966828	2:48688094	2:48688094	A	G/A	-		SNP	dbSNP	Cited~Phenotype_or_Disease	pathogenic	missense variant	1	deleterious	0	999	probably damaging	0.998	ENST00000294954.11
LSHR_HUMAN	571	M/I	6.37x37	M571	rs121912519	23966813	2:48688084	2:48688084	T	C/T	-		SNP	dbSNP	Cited~Phenotype_or_Disease	pathogenic	missense variant	1	deleterious	0	986	probably damaging	0.985	ENST00000294954.11
LSHR_HUMAN	572	A/V	6.38x38	A572	rs121912522	23966816	2:48688082	2:48688082	A	G/A	-		SNP	dbSNP	Cited~Phenotype_or_Disease	pathogenic	missense variant	1	deleterious	0	999	probably damaging	0.998	ENST00000294954.11
LSHR_HUMAN	577	T/I	6.43x43	T577	rs121912521	23966815	2:48688067	2:48688067	A	G/A	-		SNP	dbSNP	Cited~Phenotype_or_Disease	pathogenic	missense variant	1	deleterious	0	1000	probably damaging	0.999	ENST00000294954.11
LSHR_HUMAN	578	D/G	6.44x44	D578	rs121912518	23966812	2:48688064	2:48688064	C	T/C	-		SNP	dbSNP	Cited~Phenotype_or_Disease	uncertain significance~pathogenic	missense variant	1	deleterious	0	677	possibly damaging	0.676	ENST00000294954.11
LSHR_HUMAN	578	D/Y	6.44x44	D578	rs121912532	23966826	2:48688065	2:48688065	A	C/A/G/T	-		SNP	dbSNP	Frequency~Cited~Phenotype_or_Disease~ExAC	likely pathogenic~pathogenic	missense variant	1	deleterious	0	987	probably damaging	0.986	ENST00000294954.11
LSHR_HUMAN	578	D/H	6.44x44	D578	rs121912532	23966826	2:48688065	2:48688065	G	C/A/G/T	-		SNP	dbSNP	Frequency~Cited~Phenotype_or_Disease~ExAC	likely pathogenic~pathogenic	missense variant	1	deleterious	0	973	probably damaging	0.972	ENST00000294954.11
LSHR_HUMAN	578	D/N	6.44x44	D578	rs121912532	23966826	2:48688065	2:48688065	T	C/A/G/T	-		SNP	dbSNP	Frequency~Cited~Phenotype_or_Disease~ExAC	likely pathogenic~pathogenic	missense variant	31	deleterious	0.03	63	benign	0.062	ENST00000294954.11
LSHR_HUMAN	593	A/P	6.59x59	A593	rs121912520	23966814	2:48688020	2:48688020	G	C/G	-		SNP	dbSNP	Cited~Phenotype_or_Disease	pathogenic	missense variant	11	deleterious	0.01	1000	probably damaging	0.999	ENST00000294954.11
LSHR_HUMAN	616	S/Y	7.46x46	S616	rs121912525	23966819	2:48687950	2:48687950	T	G/T	T	0	SNP	dbSNP	Frequency~1000Genomes~Cited~Phenotype_or_Disease~ExAC	pathogenic	missense variant	1	deleterious	0	1000	probably damaging	0.999	ENST00000294954.11
LSHR_HUMAN	625	I/K	7.55x55	I625	rs121912530	23966824	2:48687923	2:48687923	T	A/T	-		SNP	dbSNP	Frequency~Cited~Phenotype_or_Disease~ExAC	pathogenic	missense variant	1	deleterious	0	686	possibly damaging	0.685	ENST00000294954.11
MC2R_HUMAN	74	S/I	2.54x54	S74	rs104894658	18790407	18:13885298	18:13885298	A	C/A	-		SNP	dbSNP	Frequency~Cited~ESP~Phenotype_or_Disease~ExAC	pathogenic	missense variant	1	deleterious	0	996	probably damaging	0.995	ENST00000327606.3
MC2R_HUMAN	107	D/N	3.29x29	D107	rs104894661	18790410	18:13885200	18:13885200	T	C/T	-		SNP	dbSNP	Frequency~Cited~Phenotype_or_Disease~ExAC	pathogenic	missense variant	1	deleterious	0	1001	probably damaging	1	ENST00000399821.2
MC2R_HUMAN	120	S/R	3.42x42	S120	rs104894656	18790405	18:13885159	18:13885159	C	G/C	-		SNP	dbSNP	Frequency~Cited~Phenotype_or_Disease~ExAC	pathogenic	missense variant	1	deleterious	0	1001	probably damaging	1	ENST00000399821.2
MC2R_HUMAN	126	A/S	3.48x48	A126	rs267607231	50356732	18:13885143	18:13885143	A	C/A/T	-		SNP	dbSNP	Frequency~Cited~Phenotype_or_Disease~ExAC	pathogenic	missense variant	1	deleterious	0	227	benign	0.226	ENST00000327606.3
MC2R_HUMAN	126	A/T	3.48x48	A126	rs267607231	50356732	18:13885143	18:13885143	T	C/A/T	-		SNP	dbSNP	Frequency~Cited~Phenotype_or_Disease~ExAC	pathogenic	missense variant	31	deleterious	0.03	45	benign	0.044	ENST00000327606.3
MC2R_HUMAN	128	R/C	3.50x50	R128	rs104894657	18790406	18:13885137	18:13885137	A	G/A	-		SNP	dbSNP	Frequency~Cited~ESP~Phenotype_or_Disease~ExAC	pathogenic	missense variant	1	deleterious	0	1001	probably damaging	1	ENST00000327606.3
MC2R_HUMAN	137	R/W	34.52x52	R137	rs104894660	18790409	18:13885110	18:13885110	A	G/A/T	-		SNP	dbSNP	Frequency~Cited~Phenotype_or_Disease~ExAC	pathogenic	missense variant	1	deleterious	0	852	possibly damaging	0.851	ENST00000327606.3
MC2R_HUMAN	142	V/M	34.57x57	V142	rs199950178	48239096	18:13885095	18:13885095	T	C/T	T	0	SNP	dbSNP	Frequency~1000Genomes~Phenotype_or_Disease~ExAC	pathogenic	missense variant	1001	tolerated	1	24	benign	0.023	ENST00000327606.3
MC2R_HUMAN	251	C/F	7.28x27	C251	rs104894662	18790411	18:13884767	18:13884767	A	C/A/G/T	-		SNP	dbSNP	Frequency~Cited~Phenotype_or_Disease	pathogenic	missense variant	1	deleterious	0	1001	probably damaging	1	ENST00000327606.3
MC2R_HUMAN	251	C/S	7.28x27	C251	rs104894662	18790411	18:13884767	18:13884767	G	C/A/G/T	-		SNP	dbSNP	Frequency~Cited~Phenotype_or_Disease	pathogenic	missense variant	1	deleterious	0	1001	probably damaging	1	ENST00000327606.3
MC2R_HUMAN	251	C/Y	7.28x27	C251	rs104894662	18790411	18:13884767	18:13884767	T	C/A/G/T	-		SNP	dbSNP	Frequency~Cited~Phenotype_or_Disease	pathogenic	missense variant	1	deleterious	0	1001	probably damaging	1	ENST00000327606.3
MC2R_HUMAN	254	Y/C	7.31x30	Y254	rs28940892	9110874	18:13884758	18:13884758	C	T/C	-		SNP	dbSNP	Cited~Phenotype_or_Disease	pathogenic	missense variant	1	deleterious	0	1000	probably damaging	0.999	ENST00000327606.3
MC2R_HUMAN	278	F/C	7.55x55	F278	rs28926182	9110012	18:13884686	18:13884686	C	A/C	C	0.024	SNP	dbSNP	Frequency~1000Genomes~Cited~ESP~Phenotype_or_Disease~ExAC	benign~likely benign	missense variant	1	deleterious	0	1000	probably damaging	0.999	ENST00000327606.3
MC3R_HUMAN	146	I/N	3.54x54	I146	rs74315393	14761573	20:56249280	20:56249280	A	T/A	-		SNP	dbSNP	Frequency~Cited~Phenotype_or_Disease~ExAC	risk factor	missense variant	1	deleterious	0	1000	probably damaging	0.999	ENST00000243911.2
MC3R_HUMAN	298	I/T	7.52x52	I298	rs121913556	23967729	20:56249736	20:56249736	C	T/C/G	-		SNP	dbSNP	Frequency~Cited~Phenotype_or_Disease~ExAC	risk factor	missense variant	1	deleterious	0	999	probably damaging	0.998	ENST00000243911.2
MC3R_HUMAN	298	I/S	7.52x52	I298	rs121913556	23967729	20:56249736	20:56249736	G	T/C/G	-		SNP	dbSNP	Frequency~Cited~Phenotype_or_Disease~ExAC	risk factor	missense variant	1	deleterious	0	999	probably damaging	0.998	ENST00000243911.2
MC4R_HUMAN	37	D/V	n-term	D37	rs13447325	8352046	18:60372240	18:60372240	A	T/A	-		SNP	dbSNP	Frequency~Cited~ESP~Phenotype_or_Disease~ExAC	likely benign~pathogenic	missense variant	241	tolerated	0.24	8	benign	0.007	ENST00000299766.4
MC4R_HUMAN	50	V/M	1.38x38	V50	rs121913557	23967730	18:60372202	18:60372202	T	C/T	-		SNP	dbSNP	Cited~Phenotype_or_Disease	pathogenic	missense variant	1	deleterious	0	973	probably damaging	0.972	ENST00000299766.4
MC4R_HUMAN	58	S/C	1.46x46	S58	rs121913558	23967731	18:60372178	18:60372178	A	T/A	-		SNP	dbSNP	Cited~Phenotype_or_Disease	pathogenic	missense variant	21	deleterious	0.02	993	probably damaging	0.992	ENST00000299766.4
MC4R_HUMAN	61	E/K	1.49x49	E61	rs370479598	52936844	18:60372169	18:60372169	T	C/T	-		SNP	dbSNP	Frequency~ESP~Phenotype_or_Disease~ExAC	likely pathogenic~pathogenic	missense variant	1	deleterious	0	981	probably damaging	0.98	ENST00000299766.4
MC4R_HUMAN	62	N/S	1.50x50	N62	rs121913566	23967739	18:60372165	18:60372165	C	T/C	-		SNP	dbSNP	Frequency~Cited~Phenotype_or_Disease~ExAC	pathogenic	missense variant	1	deleterious	0	1001	probably damaging	1	ENST00000299766.4
MC4R_HUMAN	69	I/R	1.57x57	I69	rs751160202	116723536	18:60372144	18:60372144	C	A/C/G	-		SNP	dbSNP	Frequency~Cited~Phenotype_or_Disease~ExAC	pathogenic	missense variant	1	deleterious	0	996	probably damaging	0.995	ENST00000299766.4
MC4R_HUMAN	69	I/T	1.57x57	I69	rs751160202	116723536	18:60372144	18:60372144	G	A/C/G	-		SNP	dbSNP	Frequency~Cited~Phenotype_or_Disease~ExAC	pathogenic	missense variant	1	deleterious	0	982	probably damaging	0.981	ENST00000299766.4
MC4R_HUMAN	94	S/N	2.54x54	S94	rs772213710	137763659	18:60372069	18:60372069	T	C/T	-		SNP	dbSNP	Frequency~ExAC	likely pathogenic	missense variant	1	deleterious	0	1000	probably damaging	0.999	ENST00000299766.4
MC4R_HUMAN	97	N/D	2.57x57	N97	rs121913565	23967738	18:60372061	18:60372061	C	T/C	-		SNP	dbSNP	Cited~Phenotype_or_Disease	pathogenic	missense variant	1	deleterious	0	993	probably damaging	0.992	ENST00000299766.4
MC4R_HUMAN	98	G/R	2.58x58	G98	rs2282556	1681413	18:60372058	18:60372058	T	C/T	-		SNP	dbSNP	Frequency~HapMap~ExAC		missense variant	11	deleterious	0.01	865	possibly damaging	0.864	ENST00000299766.4
MC4R_HUMAN	102	I/S	2.62x62	I102	rs121913559	23967732	18:60372045	18:60372045	C	A/C/G	-		SNP	dbSNP	Frequency~Cited~Phenotype_or_Disease~ExAC	pathogenic	missense variant	21	deleterious	0.02	979	probably damaging	0.978	ENST00000299766.4
MC4R_HUMAN	102	I/T	2.62x62	I102	rs121913559	23967732	18:60372045	18:60372045	G	A/C/G	-		SNP	dbSNP	Frequency~Cited~Phenotype_or_Disease~ExAC	pathogenic	missense variant	111	tolerated	0.11	956	probably damaging	0.955	ENST00000299766.4
MC4R_HUMAN	127	S/L	3.30x30	S127	rs13447331	8352052	18:60371970	18:60371970	A	G/A	-		SNP	dbSNP	Frequency~Cited~ESP~Phenotype_or_Disease~ExAC	likely pathogenic	missense variant	101	tolerated	0.1	997	probably damaging	0.996	ENST00000299766.4
MC4R_HUMAN	150	T/I	3.53x53	T150	rs766665118	132211255	18:60371901	18:60371901	A	G/A	-		SNP	dbSNP	Frequency~Phenotype_or_Disease~ExAC	likely pathogenic	missense variant	1	deleterious	0	1001	probably damaging	1	ENST00000299766.4
MC4R_HUMAN	165	R/Q	4.41x41	R165	rs747681609	113242486	18:60371856	18:60371856	T	C/T	-		SNP	dbSNP	Frequency~Cited~Phenotype_or_Disease~ExAC	likely pathogenic	missense variant	1	deleterious	0	982	probably damaging	0.981	ENST00000299766.4
MC4R_HUMAN	170	I/V	4.46x46	I170	rs121913560	23967733	18:60371842	18:60371842	C	T/C	C	0.001	SNP	dbSNP	Frequency~1000Genomes~Cited~ESP~Phenotype_or_Disease~ExAC	pathogenic	missense variant	61	tolerated	0.06	640	possibly damaging	0.639	ENST00000299766.4
MC4R_HUMAN	175	A/T	4.51x51	A175	rs121913563	23967736	18:60371827	18:60371827	T	C/T	-		SNP	dbSNP	Frequency~Cited~ESP~Phenotype_or_Disease~ExAC	pathogenic	missense variant	1001	tolerated	1	24	benign	0.023	ENST00000299766.4
MC4R_HUMAN	180	S/P	4.56x56	S180	rs193922685	47823030	18:60371812	18:60371812	G	A/G	-		SNP	dbSNP	Phenotype_or_Disease	likely pathogenic	missense variant	61	tolerated	0.06	654	possibly damaging	0.653	ENST00000299766.4
MC4R_HUMAN	181	G/D	4.57x57	G181	rs13447333	8352054	18:60371808	18:60371808	T	C/T	-		SNP	dbSNP	Frequency~ExAC		missense variant	1	deleterious	0	1001	probably damaging	1	ENST00000299766.4
MC4R_HUMAN	219	A/V	5.55x55	A219	rs121913567	23967740	18:60371694	18:60371694	A	G/A	-		SNP	dbSNP	Cited~Phenotype_or_Disease	pathogenic	missense variant	1	deleterious	0	851	possibly damaging	0.85	ENST00000299766.4
MC4R_HUMAN	251	I/L	6.41x41	I251	rs52820871	10831095	18:60371599	18:60371599	G	T/G	G	0.003	SNP	dbSNP	Frequency~1000Genomes~Cited~ESP~Phenotype_or_Disease~ExAC	uncertain significance~likely benign	missense variant	1001	tolerated	1	6	benign	0.005	ENST00000299766.4
MC4R_HUMAN	252	G/S	6.42x42	G252	rs13447336	8352057	18:60371596	18:60371596	T	C/T	-		SNP	dbSNP	Frequency~ExAC		missense variant	1	deleterious	0	1001	probably damaging	1	ENST00000299766.4
MC4R_HUMAN	253	V/I	6.43x43	V253	rs187152753	41683699	18:60371593	18:60371593	T	C/T	T	0.001	SNP	dbSNP	Frequency~1000Genomes~ESP~ExAC		missense variant	371	tolerated	0.37	463	possibly damaging	0.462	ENST00000299766.4
MC4R_HUMAN	269	I/N	6.59x59	I269	rs79783591	18404044	18:60371544	18:60371544	T	A/T	T	0	SNP	dbSNP	Frequency~1000Genomes~Cited~Phenotype_or_Disease~ExAC	uncertain significance~likely pathogenic	missense variant	1	deleterious	0	993	probably damaging	0.992	ENST00000299766.4
MC4R_HUMAN	271	C/Y	6.61x61	C271	rs121913562	23967735	18:60371538	18:60371538	T	C/T	-		SNP	dbSNP	Cited~Phenotype_or_Disease	pathogenic	missense variant	1	deleterious	0	1001	probably damaging	1	ENST00000299766.4
MC4R_HUMAN	271	C/R	6.61x61	C271	rs1057517991	325081828	18:60371539	18:60371539	G	A/G	-		SNP	dbSNP		pathogenic	missense variant	1	deleterious	0	1001	probably damaging	1	ENST00000299766.4
MC4R_HUMAN	274	N/S	ECL3	N274	rs121913561	23967734	18:60371529	18:60371529	C	T/C	-		SNP	dbSNP	Frequency~Cited~Phenotype_or_Disease~ExAC	pathogenic	missense variant	91	tolerated	0.09	860	possibly damaging	0.859	ENST00000299766.4
MC4R_HUMAN	299	P/L	7.50x50	P299	rs52804924	10831075	18:60371454	18:60371454	A	G/A/T	-		SNP	dbSNP	Frequency~Cited~ESP~Phenotype_or_Disease~ExAC	pathogenic	missense variant	1	deleterious	0	1001	probably damaging	1	ENST00000299766.4
MC4R_HUMAN	299	P/H	7.50x50	P299	rs52804924	10831075	18:60371454	18:60371454	T	G/A/T	-		SNP	dbSNP	Frequency~Cited~ESP~Phenotype_or_Disease~ExAC	pathogenic	missense variant	1	deleterious	0	1001	probably damaging	1	ENST00000299766.4
MC4R_HUMAN	316	I/S	8.57x57	I316	rs121913564	23967737	18:60371403	18:60371403	C	A/C	-		SNP	dbSNP	Frequency~Cited~Phenotype_or_Disease~ExAC	pathogenic	missense variant	1	deleterious	0	822	possibly damaging	0.821	ENST00000299766.4
MC4R_HUMAN	317	I/T	8.58x58	I317	rs13447337	8352058	18:60371400	18:60371400	G	A/G	-		SNP	dbSNP	Frequency~ExAC		missense variant	41	deleterious	0.04	198	benign	0.197	ENST00000299766.4
MC4R_HUMAN	317	I/F	8.58x58	I317	rs778685158	144232527	18:60371401	18:60371401	A	T/A/C	-		SNP	dbSNP	Frequency~ExAC		missense variant	361	tolerated	0.36	10	benign	0.009	ENST00000299766.4
MC4R_HUMAN	317	I/V	8.58x58	I317	rs778685158	144232527	18:60371401	18:60371401	C	T/A/C	-		SNP	dbSNP	Frequency~ExAC		missense variant	511	tolerated	0.51	6	benign	0.005	ENST00000299766.4
MC5R_HUMAN	209	F/L	5.62x62	F209	rs2236700	1639147	18:13826392	18:13826392	G	C/G	G	0.265	SNP	dbSNP	Frequency~HapMap~1000Genomes~Cited~ESP~ExAC		missense variant	251	tolerated	0.25	997	probably damaging	0.996	ENST00000324750.5
MSHR_HUMAN	60	V/L	1.54x54	V60	rs1805005	1246060	16:89919436	16:89919436	T	G/T	T	0.035	SNP	dbSNP	Frequency~HapMap~1000Genomes~Cited~ESP~Phenotype_or_Disease~ExAC	benign~association	missense variant	341	tolerated	0.34	952	probably damaging	0.951	ENST00000555147.1
MSHR_HUMAN	83	S/P	2.49x49	S83	rs34474212	9504440	16:89919505	16:89919505	C	T/C	C	0	SNP	dbSNP	Frequency~1000Genomes~Cited~ESP~Phenotype_or_Disease~ExAC	benign~likely benign~likely pathogenic	missense variant	1	deleterious	0	985	probably damaging	0.984	ENST00000555147.1
MSHR_HUMAN	84	D/E	2.50x50	D84	rs1805006	1246061	16:89919510	16:89919510	G	C/A/G	A	0.003	SNP	dbSNP	Frequency~1000Genomes~Cited~ESP~Phenotype_or_Disease~ExAC	benign~likely benign~likely pathogenic	missense variant	1	deleterious	0	937	probably damaging	0.936	ENST00000639847.1
MSHR_HUMAN	92	V/M	2.58x58	V92	rs2228479	1632245	16:89919532	16:89919532	A	G/A/C	A	0.08	SNP	dbSNP	Frequency~HapMap~1000Genomes~Cited~ESP~Phenotype_or_Disease~ExAC	benign~association	missense variant	101	tolerated	0.1	35	benign	0.034	ENST00000555147.1
MSHR_HUMAN	92	V/L	2.58x58	V92	rs2228479	1632245	16:89919532	16:89919532	C	G/A/C	A	0.08	SNP	dbSNP	Frequency~HapMap~1000Genomes~Cited~ESP~Phenotype_or_Disease~ExAC	benign~association	missense variant	461	tolerated	0.46	10	benign	0.009	ENST00000555147.1
MSHR_HUMAN	151	R/S	34.52x52	R151	rs1805007	1246062	16:89919709	16:89919709	A	C/A/G/T	T	0.019	SNP	dbSNP	Frequency~HapMap~1000Genomes~Cited~ESP~Phenotype_or_Disease~ExAC	benign~likely benign~pathogenic~risk factor~association	missense variant	1	deleterious	0	951	probably damaging	0.95	ENST00000639847.1
MSHR_HUMAN	151	R/G	34.52x52	R151	rs1805007	1246062	16:89919709	16:89919709	G	C/A/G/T	T	0.019	SNP	dbSNP	Frequency~HapMap~1000Genomes~Cited~ESP~Phenotype_or_Disease~ExAC	benign~likely benign~pathogenic~risk factor~association	missense variant	1	deleterious	0	965	probably damaging	0.964	ENST00000639847.1
MSHR_HUMAN	151	R/C	34.52x52	R151	rs1805007	1246062	16:89919709	16:89919709	T	C/A/G/T	T	0.019	SNP	dbSNP	Frequency~HapMap~1000Genomes~Cited~ESP~Phenotype_or_Disease~ExAC	benign~likely benign~pathogenic~risk factor~association	missense variant	21	deleterious	0.02	997	probably damaging	0.996	ENST00000639847.1
MSHR_HUMAN	157	T/I	4.38x38	T157	rs104894524	18790282	16:89919728	16:89919728	T	C/T	-		SNP	dbSNP	Frequency~Cited~Phenotype_or_Disease~ExAC	risk factor	missense variant	1	deleterious	0	974	probably damaging	0.973	ENST00000639847.1
MSHR_HUMAN	159	P/T	4.40x40	P159	rs104894523	18790281	16:89919733	16:89919733	A	C/A/T	-		SNP	dbSNP	Frequency~Cited~Phenotype_or_Disease~ExAC	risk factor	missense variant	61	tolerated	0.06	15	benign	0.014	ENST00000639847.1
MSHR_HUMAN	159	P/S	4.40x40	P159	rs104894523	18790281	16:89919733	16:89919733	T	C/A/T	-		SNP	dbSNP	Frequency~Cited~Phenotype_or_Disease~ExAC	risk factor	missense variant	151	tolerated	0.15	8	benign	0.007	ENST00000639847.1
MSHR_HUMAN	160	R/W	4.41x41	R160	rs1805008	1246063	16:89919736	16:89919736	T	C/T	T	0.015	SNP	dbSNP	Frequency~HapMap~1000Genomes~Cited~ESP~Phenotype_or_Disease~ExAC	likely benign~pathogenic~risk factor~association	missense variant	1	deleterious	0	441	benign	0.44	ENST00000639847.1
MSHR_HUMAN	294	D/N	7.49x49	D294	rs1805009	1246064	16:89920138	16:89920138	A	G/A/C	C	0.003	SNP	dbSNP	Frequency~1000Genomes~Cited~ESP~Phenotype_or_Disease~ExAC	benign~likely benign~pathogenic~association	missense variant	11	deleterious	0.01	1001	probably damaging	1	ENST00000639847.1
MSHR_HUMAN	294	D/H	7.49x49	D294	rs1805009	1246064	16:89920138	16:89920138	C	G/A/C	C	0.003	SNP	dbSNP	Frequency~1000Genomes~Cited~ESP~Phenotype_or_Disease~ExAC	benign~likely benign~pathogenic~association	missense variant	1	deleterious	0	1001	probably damaging	1	ENST00000639847.1
MTR1B_HUMAN	23	S/T	N-term	S23	rs387906779	59530228	11:92969849	11:92969849	C	G/C	-		SNP	dbSNP	Cited~Phenotype_or_Disease	risk factor	missense variant		-		1	unknown	0	ENST00000528076.1
MTR1B_HUMAN	42	A/P	1.34x34	A42	rs387906779	59530228	11:92969849	11:92969849	C	G/C	-		SNP	dbSNP	Cited~Phenotype_or_Disease	risk factor	missense variant	151	tolerated	0.15	542	possibly damaging	0.541	ENST00000257068.2
MTR1B_HUMAN	60	L/Q	1.52x52	L60	rs141804752	27275644	11:92969904	11:92969904	A	T/A/G	G	0	SNP	dbSNP	Frequency~1000Genomes~Cited~ESP~Phenotype_or_Disease~ExAC	risk factor	missense variant	11	deleterious	0.01	747	possibly damaging	0.746	ENST00000257068.2
MTR1B_HUMAN	60	L/R	1.52x52	L60	rs141804752	27275644	11:92969904	11:92969904	G	T/A/G	G	0	SNP	dbSNP	Frequency~1000Genomes~Cited~ESP~Phenotype_or_Disease~ExAC	risk factor	missense variant	31	deleterious	0.03	969	probably damaging	0.968	ENST00000257068.2
MTR1B_HUMAN	95	P/L	2.59x59	P95	rs182349376	36889440	11:92981507	11:92981507	T	C/T	-		SNP	dbSNP	Frequency~Cited~Phenotype_or_Disease~ExAC	risk factor	missense variant	41	deleterious	0.04	989	probably damaging	0.988	ENST00000257068.2
MTR1B_HUMAN	308	Y/S	7.53x53	Y308	rs184917682	39452967	11:92982146	11:92982146	C	A/C/G	-		SNP	dbSNP	Frequency~Cited~Phenotype_or_Disease~ExAC	risk factor	missense variant	1	deleterious	0	1001	probably damaging	1	ENST00000257068.2
MTR1B_HUMAN	308	Y/C	7.53x53	Y308	rs184917682	39452967	11:92982146	11:92982146	G	A/C/G	-		SNP	dbSNP	Frequency~Cited~Phenotype_or_Disease~ExAC	risk factor	missense variant	21	deleterious	0.02	1001	probably damaging	1	ENST00000257068.2
NK2R_HUMAN	231	G/E	5.72x72	G231	rs77038916	16576419	10:69408971	10:69408971	T	C/T	T	0.127	SNP	dbSNP	Frequency~1000Genomes~ESP~ExAC		missense variant	11	deleterious	0.01	981	probably damaging	0.98	ENST00000373306.4
NK2R_HUMAN	375	R/H	C-term	R375	rs2229170	1632578	10:69404899	10:69404899	T	C/T	T	0.126	SNP	dbSNP	Frequency~1000Genomes~Cited~ESP~ExAC		missense variant	131	tolerated	0.13	1	benign	0	ENST00000373306.4
NK3R_HUMAN	93	G/A	1.40x40	G93	rs121918124	23968249	4:103719398	4:103719398	G	C/G/T	-		SNP	dbSNP	Cited~Phenotype_or_Disease	not provided~pathogenic	missense variant	541	tolerated	0.54	16	benign	0.015	ENST00000304883.2
NK3R_HUMAN	93	G/D	1.40x40	G93	rs121918124	23968249	4:103719398	4:103719398	T	C/G/T	-		SNP	dbSNP	Cited~Phenotype_or_Disease	not provided~pathogenic	missense variant	71	tolerated	0.07	148	benign	0.147	ENST00000304883.2
NK3R_HUMAN	171	A/S	3.38x38	A171	rs201195175	49371009	4:103719165	4:103719165	A	C/A/G	-		SNP	dbSNP	Cited~Phenotype_or_Disease	likely pathogenic	missense variant	121	tolerated	0.12	861	possibly damaging	0.86	ENST00000304883.2
NK3R_HUMAN	171	A/P	3.38x38	A171	rs201195175	49371009	4:103719165	4:103719165	G	C/A/G	-		SNP	dbSNP	Cited~Phenotype_or_Disease	likely pathogenic	missense variant	1	deleterious	0	1001	probably damaging	1	ENST00000304883.2
NK3R_HUMAN	231	T/I	ECL2	T231	rs764659822	130204539	4:103658260	4:103658260	A	G/A	-		SNP	dbSNP	Frequency~Phenotype_or_Disease~ExAC	likely pathogenic	missense variant	131	tolerated	0.13	909	possibly damaging	0.908	ENST00000304883.2
NK3R_HUMAN	256	Y/H	5.47x47	Y256	rs397515483	59534467	4:103656316	4:103656316	G	A/G	-		SNP	dbSNP	Cited~Phenotype_or_Disease	pathogenic	missense variant	1	deleterious	0	1001	probably damaging	1	ENST00000304883.2
NK3R_HUMAN	353	P/S	7.50x50	P353	rs121918125	23968250	4:103591515	4:103591515	A	G/A	-		SNP	dbSNP	Frequency~Cited~Phenotype_or_Disease~ExAC	not provided~pathogenic	missense variant	1	deleterious	0	1001	probably damaging	1	ENST00000304883.2
NK3R_HUMAN	364	R/Q	8.51x51	R364	rs150288991	34341200	4:103589989	4:103589989	T	C/G/T	T	0	SNP	dbSNP	Frequency~1000Genomes~ESP~ExAC		missense variant	1	deleterious	0	999	probably damaging	0.998	ENST00000304883.2
NPSR1_HUMAN	107	N/I	2.63x63	N107	rs324981	201206	7:34778501	7:34778501	T	A/T	T	0.467	SNP	dbSNP	Frequency~HapMap~1000Genomes~Cited~ESP~Phenotype_or_Disease~ExAC	risk factor	missense variant~NMD transcript variant	1001	tolerated	1	1	benign	0	ENST00000396095.6
OGR1_HUMAN	74	L/P	2.57x57	L74	rs1057517672	325081509	14:91234830	14:91234830	G	A/G	-		SNP	dbSNP	Phenotype_or_Disease	pathogenic	missense variant	11	deleterious	0.01	1001	probably damaging	1	ENST00000529102.1
OPRM_HUMAN	6	A/V	N-term	A6	rs1799972	1242176	6:154039561	6:154039561	T	C/A/G/T	T	0.071	SNP	dbSNP	Frequency~1000Genomes~Cited~ESP~ExAC		missense variant	721	tolerated - low confidence	0.72	4	benign	0.003	ENST00000229768.9
OPRM_HUMAN	40	N/D	N-term	N40	rs1799971	1242175	6:154039662	6:154039662	G	A/G	G	0.223	SNP	dbSNP	Frequency~HapMap~1000Genomes~Cited~ESP~Phenotype_or_Disease~ExAC	uncertain significance~drug response	missense variant	51	tolerated	0.05	139	benign	0.138	ENST00000229768.9
OPRM_HUMAN	88	N/D	1.50x50	N88	rs1799971	1242175	6:154039662	6:154039662	G	A/G	G	0.223	SNP	dbSNP	Frequency~HapMap~1000Genomes~Cited~ESP~Phenotype_or_Disease~ExAC	uncertain significance~drug response	missense variant	31	deleterious	0.03	943	probably damaging	0.942	ENST00000520282.5
OPSB_HUMAN	79	G/R	2.49x49	G79	rs104894031	18789826	7:128775556	7:128775556	T	C/T	T	0	SNP	dbSNP	Frequency~1000Genomes~Cited~ESP~Phenotype_or_Disease~ExAC	pathogenic	missense variant	11	deleterious	0.01	848	possibly damaging	0.847	ENST00000249389.2
OPSB_HUMAN	214	S/A	5.52x52	S214	rs104894032	18789827	7:128774545	7:128774545	C	A/C/G	-		SNP	dbSNP	Frequency~Cited~Phenotype_or_Disease~ExAC	pathogenic	missense variant	531	tolerated	0.53	8	benign	0.007	ENST00000249389.2
OPSB_HUMAN	214	S/P	5.52x52	S214	rs104894032	18789827	7:128774545	7:128774545	G	A/C/G	-		SNP	dbSNP	Frequency~Cited~Phenotype_or_Disease~ExAC	pathogenic	missense variant	171	tolerated	0.17	530	possibly damaging	0.529	ENST00000249389.2
OPSB_HUMAN	264	P/S	6.50x50	P264	rs104894033	18789828	7:128773786	7:128773786	A	G/A	-		SNP	dbSNP	Frequency~Cited~Phenotype_or_Disease~ExAC	pathogenic	missense variant	1	deleterious	0	1001	probably damaging	1	ENST00000249389.2
OPSD_HUMAN	15	N/S	N-term	N15	rs104893786	18789602	3:129528777	3:129528777	G	A/G	-		SNP	dbSNP	Cited~Phenotype_or_Disease	pathogenic	missense variant	11	deleterious	0.01	964	probably damaging	0.963	ENST00000296271.3
OPSD_HUMAN	17	T/M	N-term	T17	rs104893769	18789587	3:129528783	3:129528783	T	C/T	-		SNP	dbSNP	Cited~Phenotype_or_Disease	pathogenic	missense variant	1	deleterious	0	910	probably damaging	0.909	ENST00000296271.3
OPSD_HUMAN	23	P/A	N-term	P23	rs104893797	18789613	3:129528800	3:129528800	G	C/G	-		SNP	dbSNP	Cited~Phenotype_or_Disease	pathogenic	missense variant	11	deleterious	0.01	997	probably damaging	0.996	ENST00000296271.3
OPSD_HUMAN	23	P/H	N-term	P23	rs104893768	18789586	3:129528801	3:129528801	A	C/A	-		SNP	dbSNP	Cited~Phenotype_or_Disease	pathogenic	missense variant	1	deleterious	0	1001	probably damaging	1	ENST00000296271.3
OPSD_HUMAN	45	F/L	1.40x40	F45	rs104893770	18789588	3:129528866	3:129528866	C	T/C	C	0	SNP	dbSNP	Frequency~1000Genomes~Cited~Phenotype_or_Disease~ExAC	pathogenic	missense variant	531	tolerated	0.53	980	probably damaging	0.979	ENST00000296271.3
OPSD_HUMAN	51	G/R	1.46x46	G51	rs104893792	18789608	3:129528884	3:129528884	C	G/C	-		SNP	dbSNP	Cited~Phenotype_or_Disease	pathogenic	missense variant	1	deleterious	0	1001	probably damaging	1	ENST00000296271.3
OPSD_HUMAN	53	P/R	1.48x48	P53	rs28933395	9110391	3:129528891	3:129528891	G	C/G	-		SNP	dbSNP	Cited~Phenotype_or_Disease	likely pathogenic~pathogenic	missense variant	1	deleterious	0	1000	probably damaging	0.999	ENST00000296271.3
OPSD_HUMAN	58	T/R	1.53x53	T58	rs28933394	9110390	3:129528906	3:129528906	G	C/G/T	-		SNP	dbSNP	Frequency~Cited~ESP~Phenotype_or_Disease~ExAC	pathogenic	missense variant	1	deleterious	0	1001	probably damaging	1	ENST00000296271.3
OPSD_HUMAN	58	T/M	1.53x53	T58	rs28933394	9110390	3:129528906	3:129528906	T	C/G/T	-		SNP	dbSNP	Frequency~Cited~ESP~Phenotype_or_Disease~ExAC	pathogenic	missense variant	1	deleterious	0	1001	probably damaging	1	ENST00000296271.3
OPSD_HUMAN	87	V/D	2.54x54	V87	rs104893771	18789589	3:129528993	3:129528993	A	T/A	-		SNP	dbSNP	Cited~Phenotype_or_Disease	pathogenic	missense variant	31	deleterious	0.03	1000	probably damaging	0.999	ENST00000296271.3
OPSD_HUMAN	89	G/D	2.56x551	G89	rs104893772	18789590	3:129528999	3:129528999	A	G/A	-		SNP	dbSNP	Cited~Phenotype_or_Disease	pathogenic	missense variant	201	tolerated	0.2	507	possibly damaging	0.506	ENST00000296271.3
OPSD_HUMAN	90	G/D	2.57x56	G90	rs104893790	18789606	3:129529002	3:129529002	A	G/A	-		SNP	dbSNP	Cited~Phenotype_or_Disease	pathogenic	missense variant	1	deleterious	0	1001	probably damaging	1	ENST00000296271.3
OPSD_HUMAN	94	T/I	2.61x60	T94	rs104893796	18789612	3:129529014	3:129529014	T	C/T	-		SNP	dbSNP	Cited~Phenotype_or_Disease	pathogenic	missense variant	11	deleterious	0.01	1000	probably damaging	0.999	ENST00000296271.3
OPSD_HUMAN	106	G/R	3.21x21	G106	rs104893773	18789591	3:129529049	3:129529049	A	G/A/T	-		SNP	dbSNP	Frequency~Cited~Phenotype_or_Disease~ExAC	pathogenic	missense variant	1	deleterious	0	1001	probably damaging	1	ENST00000296271.3
OPSD_HUMAN	106	G/W	3.21x21	G106	rs104893773	18789591	3:129529049	3:129529049	T	G/A/T	-		SNP	dbSNP	Frequency~Cited~Phenotype_or_Disease~ExAC	pathogenic	missense variant	1	deleterious	0	1001	probably damaging	1	ENST00000296271.3
OPSD_HUMAN	110	C/Y	3.25x25	C110	rs104893787	18789603	3:129529062	3:129529062	A	G/A	-		SNP	dbSNP	Cited~Phenotype_or_Disease	pathogenic	missense variant	1	deleterious	0	1001	probably damaging	1	ENST00000296271.3
OPSD_HUMAN	114	G/D	3.29x29	G114	rs104893788	18789604	3:129529074	3:129529074	A	G/A/C	-		SNP	dbSNP	Frequency~Cited~Phenotype_or_Disease~ExAC	pathogenic	missense variant	1	deleterious	0	1001	probably damaging	1	ENST00000296271.3
OPSD_HUMAN	114	G/A	3.29x29	G114	rs104893788	18789604	3:129529074	3:129529074	C	G/A/C	-		SNP	dbSNP	Frequency~Cited~Phenotype_or_Disease~ExAC	pathogenic	missense variant	171	tolerated	0.17	1000	probably damaging	0.999	ENST00000296271.3
OPSD_HUMAN	135	R/W	3.50x50	R135	rs104893775	18789593	3:129530917	3:129530917	T	C/T	-		SNP	dbSNP	Cited~Phenotype_or_Disease	pathogenic	missense variant	1	deleterious	0	1001	probably damaging	1	ENST00000296271.3
OPSD_HUMAN	135	R/L	3.50x50	R135	rs104893774	18789592	3:129530918	3:129530918	T	G/A/T	-		SNP	dbSNP	Frequency~Cited~Phenotype_or_Disease~ExAC	pathogenic	missense variant	1	deleterious	0	1001	probably damaging	1	ENST00000296271.3
OPSD_HUMAN	135	R/Q	3.50x50	R135	rs104893774	18789592	3:129530918	3:129530918	A	G/A/T	-		SNP	dbSNP	Frequency~Cited~Phenotype_or_Disease~ExAC	pathogenic	missense variant	1	deleterious	0	1001	probably damaging	1	ENST00000296271.3
OPSD_HUMAN	150	E/K	4.39x39	E150	rs104893791	18789607	3:129530962	3:129530962	A	G/A/C	-		SNP	dbSNP	Frequency~Cited~Phenotype_or_Disease~ExAC	pathogenic	missense variant	201	tolerated	0.2	996	probably damaging	0.995	ENST00000296271.3
OPSD_HUMAN	150	E/Q	4.39x39	E150	rs104893791	18789607	3:129530962	3:129530962	C	G/A/C	-		SNP	dbSNP	Frequency~Cited~Phenotype_or_Disease~ExAC	pathogenic	missense variant	261	tolerated	0.26	995	probably damaging	0.994	ENST00000296271.3
OPSD_HUMAN	164	A/E	4.53x53	A164	rs104893793	18789609	3:129531005	3:129531005	A	C/A/T	-		SNP	dbSNP	Cited~Phenotype_or_Disease	pathogenic	missense variant	1	deleterious	0	959	probably damaging	0.958	ENST00000296271.3
OPSD_HUMAN	164	A/V	4.53x53	A164	rs104893793	18789609	3:129531005	3:129531005	T	C/A/T	-		SNP	dbSNP	Cited~Phenotype_or_Disease	pathogenic	missense variant	1	deleterious	0	535	possibly damaging	0.534	ENST00000296271.3
OPSD_HUMAN	171	P/S	4.60x60	P171	rs104893794	18789610	3:129531025	3:129531025	T	C/T	-		SNP	dbSNP	Cited~Phenotype_or_Disease	pathogenic	missense variant	1	deleterious	0	1001	probably damaging	1	ENST00000296271.3
OPSD_HUMAN	174	G/S	ECL2	G174	rs527236103	59850720	3:129531034	3:129531034	A	G/A	-		SNP	dbSNP	Frequency~Phenotype_or_Disease~ExAC	pathogenic	missense variant	1	deleterious	0	1001	probably damaging	1	ENST00000296271.3
OPSD_HUMAN	178	Y/C	ECL2	Y178	rs104893776	18789594	3:129532253	3:129532253	G	A/G	-		SNP	dbSNP	Cited~Phenotype_or_Disease	pathogenic	missense variant~splice region variant	1	deleterious	0	1001	probably damaging	1	ENST00000296271.3
OPSD_HUMAN	181	E/K	ECL2	E181	rs775557680	141109871	3:129532261	3:129532261	A	G/A/C	-		SNP	dbSNP	Frequency~Phenotype_or_Disease~ExAC	likely pathogenic~pathogenic	missense variant	1	deleterious	0	880	possibly damaging	0.879	ENST00000296271.3
OPSD_HUMAN	181	E/Q	ECL2	E181	rs775557680	141109871	3:129532261	3:129532261	C	G/A/C	-		SNP	dbSNP	Frequency~Phenotype_or_Disease~ExAC	likely pathogenic~pathogenic	missense variant	1	deleterious	0	73	benign	0.072	ENST00000296271.3
OPSD_HUMAN	182	G/S	ECL2	G182	rs104893780	18789598	3:129532264	3:129532264	A	G/A	-		SNP	dbSNP	Cited~Phenotype_or_Disease	pathogenic	missense variant	1	deleterious	0	1001	probably damaging	1	ENST00000296271.3
OPSD_HUMAN	188	G/R	45.51x51	G188	rs527236100	59850717	3:129532282	3:129532282	A	G/A	-		SNP	dbSNP	Phenotype_or_Disease	pathogenic	missense variant	1	deleterious	0	1001	probably damaging	1	ENST00000296271.3
OPSD_HUMAN	190	D/N	ECL2	D190	rs104893779	18789597	3:129532288	3:129532288	A	G/A/T	-		SNP	dbSNP	Cited~Phenotype_or_Disease	likely pathogenic~pathogenic	missense variant	121	tolerated	0.12	810	possibly damaging	0.809	ENST00000296271.3
OPSD_HUMAN	190	D/Y	ECL2	D190	rs104893779	18789597	3:129532288	3:129532288	T	G/A/T	-		SNP	dbSNP	Cited~Phenotype_or_Disease	likely pathogenic~pathogenic	missense variant	1	deleterious	0	963	probably damaging	0.962	ENST00000296271.3
OPSD_HUMAN	190	D/G	ECL2	D190	rs104893777	18789595	3:129532289	3:129532289	G	A/G	-		SNP	dbSNP	Cited~Phenotype_or_Disease	pathogenic	missense variant	11	deleterious	0.01	786	possibly damaging	0.785	ENST00000296271.3
OPSD_HUMAN	207	M/R	5.42x43	M207	rs104893782	18789600	3:129532340	3:129532340	G	T/G	-		SNP	dbSNP	Cited~Phenotype_or_Disease	pathogenic	missense variant	1	deleterious	0	990	probably damaging	0.989	ENST00000296271.3
OPSD_HUMAN	211	H/P	5.46x461	H211	rs28933993	9110442	3:129532352	3:129532352	C	A/C	-		SNP	dbSNP	Cited~Phenotype_or_Disease	pathogenic	missense variant	281	tolerated	0.28	1001	probably damaging	1	ENST00000296271.3
OPSD_HUMAN	267	P/L	6.50x50	P267	rs104893781	18789599	3:129532636	3:129532636	T	C/T	-		SNP	dbSNP	Cited~Phenotype_or_Disease	pathogenic	missense variant	1	deleterious	0	1001	probably damaging	1	ENST00000296271.3
OPSD_HUMAN	292	A/E	7.39x38	A292	rs104893789	18789605	3:129532711	3:129532711	A	C/A	-		SNP	dbSNP	Cited~Phenotype_or_Disease	pathogenic	missense variant	1	deleterious	0	635	possibly damaging	0.634	ENST00000296271.3
OPSD_HUMAN	296	K/E	7.43x42	K296	rs29001653	9117182	3:129532722	3:129532722	G	A/G	-		SNP	dbSNP	Cited~Phenotype_or_Disease	pathogenic	missense variant	11	deleterious	0.01	999	probably damaging	0.998	ENST00000296271.3
OPSD_HUMAN	345	V/M	C-term	V345	rs104893795	18789611	3:129533704	3:129533704	A	G/A/C	-		SNP	dbSNP	Cited~Phenotype_or_Disease	pathogenic	missense variant	1	deleterious	0	980	probably damaging	0.979	ENST00000296271.3
OPSD_HUMAN	345	V/L	C-term	V345	rs104893795	18789611	3:129533704	3:129533704	C	G/A/C	-		SNP	dbSNP	Cited~Phenotype_or_Disease	pathogenic	missense variant	1	deleterious	0	749	possibly damaging	0.748	ENST00000296271.3
OPSD_HUMAN	347	P/S	C-term	V345	rs29001637	9117172	3:129533710	3:129533710	T	C/T	-		SNP	dbSNP	Cited~Phenotype_or_Disease	pathogenic	missense variant	251	tolerated	0.25	987	probably damaging	0.986	ENST00000296271.3
OPSD_HUMAN	347	P/Q	C-term	P347	rs29001566	9117138	3:129533711	3:129533711	A	C/A/G/T	-		SNP	dbSNP	Frequency~Cited~Phenotype_or_Disease~ExAC	likely pathogenic~pathogenic	missense variant	1	deleterious	0	998	probably damaging	0.997	ENST00000296271.3
OPSD_HUMAN	347	P/R	C-term	P347	rs29001566	9117138	3:129533711	3:129533711	G	C/A/G/T	-		SNP	dbSNP	Frequency~Cited~Phenotype_or_Disease~ExAC	likely pathogenic~pathogenic	missense variant	1	deleterious	0	999	probably damaging	0.998	ENST00000296271.3
OPSD_HUMAN	347	P/L	C-term	P347	rs29001566	9117138	3:129533711	3:129533711	T	C/A/G/T	-		SNP	dbSNP	Frequency~Cited~Phenotype_or_Disease~ExAC	likely pathogenic~pathogenic	missense variant	1	deleterious	0	998	probably damaging	0.997	ENST00000296271.3
OPSG_HUMAN	94	N/K	2.45x45	N94	rs104894915	18790654	X:154187939	X:154187939	A	C/A	-		SNP	dbSNP	Cited~Phenotype_or_Disease	pathogenic	missense variant	1	deleterious	0	89	benign	0.088	ENST00000595290.5
OPSG_HUMAN	177	W/R	4.50x50	W177	rs267606927	50356431	X:154190173	X:154190173	C	T/C	-		SNP	dbSNP	Cited~Phenotype_or_Disease	pathogenic	missense variant	1	deleterious	0	1001	probably damaging	1	ENST00000595290.5
OPSG_HUMAN	203	C/R	45.50x50	C203	rs104894914	18790653	X:154191716	X:154191716	C	T/C	-		SNP	dbSNP	Cited~Phenotype_or_Disease	pathogenic	missense variant	1	deleterious	0	946	probably damaging	0.945	ENST00000595290.5
OPSG_HUMAN	330	R/Q	8.51x51	R330	rs104894916	18790655	X:154195934	X:154195934	A	G/A	-		SNP	dbSNP	Cited~Phenotype_or_Disease	pathogenic	missense variant	141	tolerated	0.14	19	benign	0.018	ENST00000595290.5
OPSR_HUMAN	180	S/A	4.53x53	S180	rs949431	678982	X:154153068	X:154153068	T	G/T	G	0.167	SNP	dbSNP	Frequency~1000Genomes~Cited~Phenotype_or_Disease~ExAC	benign	missense variant	841	tolerated	0.84	48	benign	0.047	ENST00000369951.8
OPSR_HUMAN	203	C/R	45.50x50	C203	rs121434621	23964995	X:154154602	X:154154602	C	T/C	-		SNP	dbSNP	Cited~Phenotype_or_Disease	pathogenic	missense variant	1	deleterious	0	752	possibly damaging	0.751	ENST00000369951.8
OPSR_HUMAN	338	G/E	8.59x59	G338	rs104894913	18790652	X:154158844	X:154158844	A	G/A	-		SNP	dbSNP	Cited~Phenotype_or_Disease	pathogenic	missense variant	1	deleterious	0	985	probably damaging	0.984	ENST00000369951.8
OX1R_HUMAN	408	I/V	C-term	I408	rs2271933	1671111	1:31626924	1:31626924	G	A/G	G	0.44	SNP	dbSNP	Frequency~HapMap~1000Genomes~Cited~ESP~ExAC		missense variant	1001	tolerated	1	1	benign	0	ENST00000403528.6
P2Y12_HUMAN	256	R/Q	6.55x55	R256	rs121917885	23968012	3:151338079	3:151338079	T	C/T	-		SNP	dbSNP	Frequency~Cited~Phenotype_or_Disease~ExAC	pathogenic	missense variant	1	deleterious	0	994	probably damaging	0.993	ENST00000302632.3
P2Y12_HUMAN	265	R/W	6.64x64	R265	rs121917886	23968013	3:151338053	3:151338053	A	G/A	-		SNP	dbSNP	Frequency~Cited~Phenotype_or_Disease~ExAC	pathogenic	missense variant	11	deleterious	0.01	949	probably damaging	0.948	ENST00000302632.3
PI2R_HUMAN	212	R/H	5.65x65	R212	rs2229131	1632551	19:46623591	19:46623591	T	C/T	T	0.007	SNP	dbSNP	Frequency~1000Genomes~Cited~ExAC		missense variant	51	tolerated	0.05	39	benign	0.038	ENST00000596260.1
PKR2_HUMAN	33	Y/H	N-term	Y33	rs886037916	153548896	20:5314273	20:5314273	G	A/G	-		SNP	dbSNP	Cited~Phenotype_or_Disease	likely pathogenic	missense variant	1	deleterious	0	1000	probably damaging	0.999	ENST00000217270.3
PKR2_HUMAN	85	R/H	12.51x51	R85	rs74315418	14761595	20:5314116	20:5314116	T	C/A/T	A	0.001	SNP	dbSNP	Frequency~1000Genomes~Cited~ESP~Phenotype_or_Disease~ExAC	uncertain significance~likely benign~pathogenic	missense variant	31	deleterious	0.03	1001	probably damaging	1	ENST00000217270.3
PKR2_HUMAN	85	R/C	12.51x51	R85	rs141090506	26679018	20:5314117	20:5314117	A	G/A/C	C	0.002	SNP	dbSNP	Frequency~1000Genomes~Cited~ESP~Phenotype_or_Disease~ExAC	uncertain significance~likely benign~likely pathogenic~pathogenic	missense variant	1	deleterious	0	1001	probably damaging	1	ENST00000217270.3
PKR2_HUMAN	115	V/M	2.66x65	V115	rs138672528	24655954	20:5314027	20:5314027	T	C/T	T	0	SNP	dbSNP	Frequency~1000Genomes~Cited~ESP~Phenotype_or_Disease~ExAC	pathogenic	missense variant	1	deleterious	0	1001	probably damaging	1	ENST00000217270.3
PKR2_HUMAN	173	L/R	4.45x45	L173	rs74315416	14761593	20:5302677	20:5302677	C	A/C	C	0.001	SNP	dbSNP	Frequency~1000Genomes~Cited~ESP~Phenotype_or_Disease~ExAC	likely benign~pathogenic	missense variant	1	deleterious	0	952	probably damaging	0.951	ENST00000217270.3
PKR2_HUMAN	178	W/S	4.50x50	W178	rs201835496	49951875	20:5302662	20:5302662	G	C/G	G	0	SNP	dbSNP	Frequency~1000Genomes~Cited~Phenotype_or_Disease~ExAC		missense variant	1	deleterious	0	1001	probably damaging	1	ENST00000217270.3
PKR2_HUMAN	188	S/L	4.60x61	S188	rs376239580	57969668	20:5302632	20:5302632	A	G/A	-		SNP	dbSNP	Frequency~Cited~ESP~Phenotype_or_Disease~ExAC	likely pathogenic	missense variant	1	deleterious	0	598	possibly damaging	0.597	ENST00000217270.3
PKR2_HUMAN	210	Q/R	45.52x52	Q210	rs74315417	14761594	20:5302566	20:5302566	C	T/C/G	-		SNP	dbSNP	Cited~Phenotype_or_Disease	pathogenic	missense variant	1	deleterious	0	999	probably damaging	0.998	ENST00000217270.3
PKR2_HUMAN	210	Q/P	45.52x52	Q210	rs74315417	14761594	20:5302566	20:5302566	G	T/C/G	-		SNP	dbSNP	Cited~Phenotype_or_Disease	pathogenic	missense variant	1	deleterious	0	1000	probably damaging	0.999	ENST00000217270.3
PKR2_HUMAN	248	R/Q	5.63x63	R248	rs376142095	57884614	20:5302452	20:5302452	T	C/T	-		SNP	dbSNP	Frequency~Cited~ESP~Phenotype_or_Disease~ExAC	pathogenic	missense variant	141	tolerated	0.14	16	benign	0.015	ENST00000217270.3
PKR2_HUMAN	323	M/I	7.43x42	M323	rs74315419	14761596	20:5302226	20:5302226	T	C/T	-		SNP	dbSNP	Cited~Phenotype_or_Disease	pathogenic	missense variant	81	tolerated	0.08	337	benign	0.336	ENST00000217270.3
RXFP2_HUMAN	222	T/P	N-term	T222	rs121918303	23968426	13:31777398	13:31777398	C	A/C/G	C	0.001	SNP	dbSNP	Frequency~1000Genomes~Cited~ESP~Phenotype_or_Disease~ExAC	uncertain significance	missense variant	71	tolerated	0.07	343	benign	0.342	ENST00000298386.6
RXFP2_HUMAN	222	T/A	N-term	T222	rs121918303	23968426	13:31777398	13:31777398	G	A/C/G	C	0.001	SNP	dbSNP	Frequency~1000Genomes~Cited~ESP~Phenotype_or_Disease~ExAC	uncertain significance	missense variant	631	tolerated	0.63	4	benign	0.003	ENST00000298386.6
S1PR2_HUMAN	108	R/P	3.28x28	R108	rs869312749	152458463	19:10224583	19:10224583	G	C/G	-		SNP	dbSNP	Cited~Phenotype_or_Disease	pathogenic	missense variant	1	deleterious	0	1000	probably damaging	0.999	ENST00000646641.1
S1PR2_HUMAN	140	Y/C	34.53x53	Y140	rs869312750	152458464	19:10224487	19:10224487	C	T/C	-		SNP	dbSNP	Cited~Phenotype_or_Disease	pathogenic	missense variant	71	tolerated	0.07	994	probably damaging	0.993	ENST00000590320.3
SSR5_HUMAN	48	L/M	1.40x40	L48	rs4988483	3211756	16:1079010	16:1079010	A	C/A	A	0.021	SNP	dbSNP	Frequency~1000Genomes~Cited~ESP~ExAC		missense variant	81	tolerated	0.08	754	possibly damaging	0.753	ENST00000293897.5
SSR5_HUMAN	109	P/T	3.22x22	P109	rs4988487	3211760	16:1079193	16:1079193	A	C/A/T	T	0.084	SNP	dbSNP	Frequency~1000Genomes~Cited~ESP~ExAC		missense variant	101	tolerated	0.1	7	benign	0.006	ENST00000293897.5
SSR5_HUMAN	109	P/S	3.22x22	P109	rs4988487	3211760	16:1079193	16:1079193	T	C/A/T	T	0.084	SNP	dbSNP	Frequency~1000Genomes~Cited~ESP~ExAC		missense variant	1001	tolerated	1	4	benign	0.003	ENST00000293897.5
SSR5_HUMAN	240	R/W	ICL3	R240	rs121917877	23968004	16:1079586	16:1079586	T	C/T	T	0.002	SNP	dbSNP	Frequency~1000Genomes~Cited~ESP~Phenotype_or_Disease~ExAC	protective	missense variant	1	deleterious	0	1000	probably damaging	0.999	ENST00000293897.5
SSR5_HUMAN	335	P/L	C-term	P335	rs169068	65436	16:1079872	16:1079872	T	C/T	C	0.482	SNP	dbSNP	Frequency~HapMap~1000Genomes~Cited~ESP~ExAC		missense variant	121	tolerated	0.12	12	benign	0.011	ENST00000293897.5
TA2R_HUMAN	28	P/S	1.36x36	P28	rs1131691334	340551365	19:3600553	19:3600553	A	G/A	-		sequence alteration	ClinVar		likely pathogenic	missense variant	11	deleterious	0.01	236	benign	0.235	ENST00000375190.8
TA2R_HUMAN	60	R/L	ICL1	R60	rs34377097	9430217	19:3600456	19:3600456	A	C/A	A	0.001	SNP	dbSNP	Frequency~1000Genomes~Cited~Phenotype_or_Disease~ExAC	risk factor	missense variant	11	deleterious - low confidence	0.01	1001	probably damaging	1	ENST00000589966.1
TA2R_HUMAN	241	V/G	6.31x31	V241	rs397514542	59533538	19:3599913	19:3599913	C	A/C	-		SNP	dbSNP	Cited~Phenotype_or_Disease	risk factor	missense variant	1	deleterious	0	956	probably damaging	0.955	ENST00000375190.8
TA2R_HUMAN	304	D/N	7.49x49	D304	rs387906691	59530140	19:3595810	19:3595810	T	C/T	-		SNP	dbSNP	Cited~Phenotype_or_Disease	risk factor	missense variant	1	deleterious	0	1001	probably damaging	1	ENST00000411851.3
TSHR_HUMAN	36	D/H	N-term	D36	rs61747482	12392586	14:80955786	14:80955786	C	G/C	C	0.001	SNP	dbSNP	Frequency~1000Genomes~Cited~ESP~Phenotype_or_Disease~ExAC	benign~likely benign	missense variant	191	tolerated	0.19	946	probably damaging	0.945	ENST00000298171.6
TSHR_HUMAN	41	C/S	N-term	C41	rs121908869	23965935	14:80955802	14:80955802	C	G/C	-		SNP	dbSNP	Frequency~Cited~ESP~Phenotype_or_Disease~ExAC	pathogenic	missense variant	1	deleterious - low confidence	0	979	probably damaging	0.978	ENST00000642209.1
TSHR_HUMAN	68	P/S	N-term	P68	rs142063461	27491596	14:81062179	14:81062179	T	C/T	T	0	SNP	dbSNP	Frequency~1000Genomes~ESP~Phenotype_or_Disease~ExAC	likely pathogenic	missense variant~NMD transcript variant	31	deleterious	0.03	999	probably damaging	0.998	ENST00000555326.5
TSHR_HUMAN	83	V/I	N-term	V83	rs201889708	50000901	14:81143400	14:81143400	A	G/A	A	0	SNP	dbSNP	Frequency~1000Genomes~Cited~Phenotype_or_Disease~ExAC	likely pathogenic	missense variant~NMD transcript variant	81	tolerated	0.08	31	benign	0.03	ENST00000637447.1
TSHR_HUMAN	109	R/Q	N-term	R109	rs121908865	23965931	14:81087962	14:81087962	A	G/A	A	0	SNP	dbSNP	Frequency~1000Genomes~Cited~ESP~Phenotype_or_Disease~ExAC	pathogenic	missense variant	431	tolerated	0.43	1000	probably damaging	0.999	ENST00000554435.1
TSHR_HUMAN	132	G/R	N-term	G132	rs760874290	126444513	14:81091070	14:81091070	C	G/C	-		SNP	dbSNP	Frequency~Cited~Phenotype_or_Disease~ExAC	uncertain significance~benign~likely pathogenic	missense variant~splice region variant	1	deleterious	0	737	possibly damaging	0.736	ENST00000554435.1
TSHR_HUMAN	162	P/A	N-term	P162	rs121908863	23965929	14:81092547	14:81092547	G	C/G	G	0	SNP	dbSNP	Frequency~1000Genomes~Cited~ESP~Phenotype_or_Disease~ExAC	pathogenic	missense variant	451	tolerated	0.45	66	benign	0.065	ENST00000554435.1
TSHR_HUMAN	167	I/N	N-term	I167	rs121908862	23965928	14:81092563	14:81092563	A	T/A	-		SNP	dbSNP	Cited~Phenotype_or_Disease	pathogenic	missense variant	1	deleterious	0	989	probably damaging	0.988	ENST00000554435.1
TSHR_HUMAN	183	K/R	N-term	K183	rs121908879	23965944	14:81096641	14:81096641	G	A/G	-		SNP	dbSNP	Cited~Phenotype_or_Disease	pathogenic	missense variant~splice region variant	251	tolerated	0.25	327	benign	0.326	ENST00000554435.1
TSHR_HUMAN	281	S/N	N-term	S281	rs121908873	23965939	14:81139828	14:81139828	A	G/A/T	-		SNP	dbSNP	Cited~Phenotype_or_Disease	pathogenic	missense variant	1	deleterious	0	929	probably damaging	0.928	ENST00000298171.6
TSHR_HUMAN	281	S/I	N-term	S281	rs121908873	23965939	14:81139828	14:81139828	T	G/A/T	-		SNP	dbSNP	Cited~Phenotype_or_Disease	pathogenic	missense variant	1	deleterious	0	951	probably damaging	0.95	ENST00000298171.6
TSHR_HUMAN	310	R/C	N-term	R310	rs121908882	23965947	14:81142986	14:81142986	T	C/T	-		SNP	dbSNP	Frequency~Cited~Phenotype_or_Disease~ExAC	not provided~pathogenic	missense variant	61	tolerated	0.06	785	possibly damaging	0.784	ENST00000298171.6
TSHR_HUMAN	390	C/W	N-term	C390	rs121908871	23965937	14:81143228	14:81143228	G	T/G	-		SNP	dbSNP	Frequency~Cited~Phenotype_or_Disease~ExAC	pathogenic	missense variant	1	deleterious	0	1000	probably damaging	0.999	ENST00000541158.6
TSHR_HUMAN	410	D/N	1.28x28	D410	rs121908868	23965934	14:81143286	14:81143286	A	G/A	-		SNP	dbSNP	Frequency~Cited~Phenotype_or_Disease~ExAC	pathogenic	missense variant	1	deleterious	0	993	probably damaging	0.992	ENST00000298171.6
TSHR_HUMAN	431	G/S	1.49x49	G431	rs121908883	23965948	14:81143349	14:81143349	A	G/A	-		SNP	dbSNP	Cited~Phenotype_or_Disease	pathogenic	missense variant	1	deleterious	0	1001	probably damaging	1	ENST00000541158.6
TSHR_HUMAN	448	V/I	2.38x38	V448	rs201889708	50000901	14:81143400	14:81143400	A	G/A	A	0	SNP	dbSNP	Frequency~1000Genomes~Cited~Phenotype_or_Disease~ExAC	likely pathogenic	missense variant	1	deleterious	0	998	probably damaging	0.997	ENST00000541158.6
TSHR_HUMAN	450	R/H	2.40x40	R450	rs189261858	43788742	14:81143407	14:81143407	A	G/A	A	0	SNP	dbSNP	Frequency~1000Genomes~Phenotype_or_Disease~ExAC	pathogenic	missense variant	1	deleterious	0	1000	probably damaging	0.999	ENST00000298171.6
TSHR_HUMAN	453	M/T	2.43x43	M453	rs121908864	23965930	14:81143416	14:81143416	C	T/C	-		SNP	dbSNP	Cited~Phenotype_or_Disease	pathogenic	missense variant	1	deleterious	0	996	probably damaging	0.995	ENST00000541158.6
TSHR_HUMAN	467	L/P	2.57x57	L467	rs121908885	23965950	14:81143458	14:81143458	C	T/C	-		SNP	dbSNP	Cited~Phenotype_or_Disease	pathogenic	missense variant	1	deleterious	0	1001	probably damaging	1	ENST00000298171.6
TSHR_HUMAN	477	T/I	2.67x67	T477	rs121908881	23965946	14:81143488	14:81143488	T	C/T	-		SNP	dbSNP	Cited~Phenotype_or_Disease	pathogenic	missense variant	1	deleterious	0	1000	probably damaging	0.999	ENST00000541158.6
TSHR_HUMAN	505	S/N	3.36x36	S505	rs121908876	23965942	14:81143572	14:81143572	A	G/A	-		SNP	dbSNP	Cited~Phenotype_or_Disease	pathogenic	missense variant	1	deleterious	0	978	probably damaging	0.977	ENST00000298171.6
TSHR_HUMAN	508	S/L	3.39x39	S508	rs772490052	138040183	14:81143581	14:81143581	T	C/T	-		SNP	dbSNP	Frequency~ExAC	likely pathogenic	missense variant	1	deleterious	0	1000	probably damaging	0.999	ENST00000541158.6
TSHR_HUMAN	509	V/A	3.40x40	V509	rs121908874	23965940	14:81143584	14:81143584	C	T/C	-		SNP	dbSNP	Cited~Phenotype_or_Disease	pathogenic	missense variant	1	deleterious	0	999	probably damaging	0.998	ENST00000541158.6
TSHR_HUMAN	525	F/L	3.56x56	F525	rs121908870	23965936	14:81143633	14:81143633	A	C/A	-		SNP	dbSNP	Cited~Phenotype_or_Disease	pathogenic	missense variant	21	deleterious	0.02	759	possibly damaging	0.758	ENST00000298171.6
TSHR_HUMAN	553	A/T	4.57x57	A553	rs121908872	23965938	14:81143715	14:81143715	A	G/A/T	-		SNP	dbSNP	Frequency~Cited~Phenotype_or_Disease~ExAC	likely benign~likely pathogenic	missense variant	1	deleterious	0	979	probably damaging	0.978	ENST00000298171.6
TSHR_HUMAN	553	A/S	4.57x57	A553	rs121908872	23965938	14:81143715	14:81143715	T	G/A/T	-		SNP	dbSNP	Frequency~Cited~Phenotype_or_Disease~ExAC	likely benign~likely pathogenic	missense variant	11	deleterious	0.01	973	probably damaging	0.972	ENST00000298171.6
TSHR_HUMAN	600	C/R	5.57x57	C600	rs121908884	23965949	14:81143856	14:81143856	C	T/C	-		SNP	dbSNP	Cited~Phenotype_or_Disease	pathogenic	missense variant	1	deleterious	0	1000	probably damaging	0.999	ENST00000298171.6
TSHR_HUMAN	619	D/G	6.30x30	D619	rs121908859	23965925	14:81143914	14:81143914	G	A/G	-		SNP	dbSNP	Cited~Phenotype_or_Disease	pathogenic	missense variant	1	deleterious	0	987	probably damaging	0.986	ENST00000298171.6
TSHR_HUMAN	623	A/I	6.34x34	A623	rs121908860	23965926	14:81143925	14:81143925-81143926	AT	GC/AT	-		substitution	dbSNP	Cited~Phenotype_or_Disease	pathogenic	missense variant	1	deleterious	0	1001	probably damaging	1	ENST00000298171.6
TSHR_HUMAN	629	L/F	6.40x40	L629	rs121908877	23965943	14:81143945	14:81143945	T	G/T	-		SNP	dbSNP	Cited~Phenotype_or_Disease	pathogenic	missense variant	1	deleterious	0	882	possibly damaging	0.881	ENST00000298171.6
TSHR_HUMAN	631	F/L	6.42x42	F631	rs121908861	23965927	14:81143949	14:81143949	C	T/C	-		SNP	dbSNP	Cited~Phenotype_or_Disease	pathogenic	missense variant	1	deleterious	0	998	probably damaging	0.997	ENST00000298171.6
TSHR_HUMAN	633	D/N	6.44x44	D633	rs28937584	9110632	14:81143955	14:81143955	A	G/A/C	-		SNP	dbSNP	Cited~Phenotype_or_Disease	pathogenic	missense variant	101	tolerated	0.1	639	possibly damaging	0.638	ENST00000541158.6
TSHR_HUMAN	633	D/H	6.44x44	D633	rs28937584	9110632	14:81143955	14:81143955	C	G/A/C	-		SNP	dbSNP	Cited~Phenotype_or_Disease	pathogenic	missense variant	1	deleterious	0	998	probably damaging	0.997	ENST00000541158.6
TSHR_HUMAN	639	P/S	6.50x50	P639	rs121908880	23965945	14:81143973	14:81143973	T	C/T	-		SNP	dbSNP	Cited~Phenotype_or_Disease	pathogenic	missense variant	1	deleterious	0	1000	probably damaging	0.999	ENST00000541158.6
TSHR_HUMAN	672	C/Y	7.47x47	C672	rs121908875	23965941	14:81144073	14:81144073	A	G/A	-		SNP	dbSNP	Cited~Phenotype_or_Disease	pathogenic	missense variant	1	deleterious	0	1000	probably damaging	0.999	ENST00000541158.6
V1AR_HUMAN	136	F/L	3.37x37	F136	rs1042615	755150	12:63150429	12:63150429	T	A/G/T	A	0.349	SNP	dbSNP	Frequency~HapMap~1000Genomes~Cited~ESP~ExAC		missense variant	1	deleterious	0	1001	probably damaging	1	ENST00000299178.3
V1BR_HUMAN	65	K/N	12.50x50	K65	rs35369693	10182953	1:206116696	1:206116696	G	C/G	G	0.017	SNP	dbSNP	Frequency~1000Genomes~Cited~ESP~ExAC		missense variant	11	deleterious	0.01	634	possibly damaging	0.633	ENST00000367126.4
V2R_HUMAN	22	K/N	N-term	N22	rs104894748	18790489	X:153906059	X:153906059	T	G/T	-		SNP	dbSNP	Cited~Phenotype_or_Disease	pathogenic	missense variant~NMD transcript variant		-		1	unknown	0	ENST00000434679.6
V2R_HUMAN	39	A/T	1.34x34	A39	rs104894755	18790496	X:153906108	X:153906108	A	G/A	-		SNP	dbSNP	Cited~Phenotype_or_Disease	pathogenic	missense variant~NMD transcript variant		-		1	unknown	0	ENST00000434679.6
V2R_HUMAN	46	I/K	1.41x41	I46	rs104894759	18790500	X:153905643	X:153905643	A	T/A	-		SNP	dbSNP	Cited~Phenotype_or_Disease	pathogenic	missense variant	21	deleterious	0.02	67	benign	0.066	ENST00000646375.1
V2R_HUMAN	59	L/P	1.54x54	L59	rs193922112	47822461	X:153905682	X:153905682	C	T/C	-		SNP	dbSNP	Cited~Phenotype_or_Disease	likely pathogenic	missense variant	1	deleterious	0	1000	probably damaging	0.999	ENST00000646375.1
V2R_HUMAN	85	D/N	2.50x50	D85	rs104894754	18790495	X:153905759	X:153905759	A	G/A	-		SNP	dbSNP	Cited~Phenotype_or_Disease	pathogenic	missense variant	1	deleterious	0	1001	probably damaging	1	ENST00000646375.1
V2R_HUMAN	97	L/P	2.62x62	L97	rs193922113	47822462	X:153905796	X:153905796	C	T/C	-		SNP	dbSNP	Phenotype_or_Disease	likely pathogenic	missense variant	1	deleterious	0	1000	probably damaging	0.999	ENST00000646375.1
V2R_HUMAN	104	R/C	23.51x51	R104	rs104894760	18790501	X:153905816	X:153905816	T	C/T	-		SNP	dbSNP	Cited~Phenotype_or_Disease	not provided~pathogenic	missense variant	1	deleterious	0	995	probably damaging	0.994	ENST00000646375.1
V2R_HUMAN	105	F/V	23.52x52	F105	rs104894758	18790499	X:153905819	X:153905819	G	T/G	-		SNP	dbSNP	Cited~Phenotype_or_Disease	pathogenic	missense variant	1	deleterious	0	986	probably damaging	0.985	ENST00000646375.1
V2R_HUMAN	112	C/F	3.25x25	C112	rs1057518723	325082561	X:153905841	X:153905841	T	G/T	-		SNP	dbSNP	Phenotype_or_Disease	likely pathogenic	missense variant	1	deleterious	0	999	probably damaging	0.998	ENST00000646375.1
V2R_HUMAN	113	R/W	3.26x26	R113	rs28935496	9110537	X:153905843	X:153905843	T	C/T	-		SNP	dbSNP	Cited~Phenotype_or_Disease	pathogenic	missense variant	1	deleterious	0	1001	probably damaging	1	ENST00000646375.1
V2R_HUMAN	130	I/F	3.43x43	I130	rs796052096	148304889	X:153905894	X:153905894	T	A/T	-		SNP	dbSNP	Cited~Phenotype_or_Disease	pathogenic	missense variant	1	deleterious	0	1001	probably damaging	1	ENST00000646375.1
V2R_HUMAN	131	L/P	3.44x44	L131	rs878853079	152463213	X:153905898	X:153905898	C	T/C	-		SNP	dbSNP	Cited	pathogenic	missense variant	1	deleterious	0	975	probably damaging	0.974	ENST00000646375.1
V2R_HUMAN	132	A/D	3.45x45	A132	rs104894747	18790488	X:153905901	X:153905901	A	C/A	-		SNP	dbSNP	Cited~Phenotype_or_Disease	pathogenic	missense variant	1	deleterious	0	1000	probably damaging	0.999	ENST00000646375.1
V2R_HUMAN	137	R/C	3.50x50	R137	rs104894761	18790502	X:153905915	X:153905915	T	C/G/T	-		SNP	dbSNP	Frequency~Cited~Phenotype_or_Disease~ExAC	likely pathogenic~pathogenic	missense variant	1	deleterious	0	1001	probably damaging	1	ENST00000337474.5
V2R_HUMAN	137	R/H	3.50x50	R137	rs104894756	18790497	X:153905916	X:153905916	A	G/A/T	-		SNP	dbSNP	Cited~Phenotype_or_Disease	pathogenic	missense variant	1	deleterious	0	1001	probably damaging	1	ENST00000337474.5
V2R_HUMAN	137	R/L	3.50x50	R137	rs104894756	18790497	X:153905916	X:153905916	T	G/A/T	-		SNP	dbSNP	Cited~Phenotype_or_Disease	pathogenic	missense variant	1	deleterious	0	1001	probably damaging	1	ENST00000337474.5
V2R_HUMAN	137	R/G	3.50x50	R137	rs104894761	18790502	X:153905915	X:153905915	G	C/G/T	-		SNP	dbSNP	Frequency~Cited~Phenotype_or_Disease~ExAC	likely pathogenic~pathogenic	missense variant	1	deleterious	0	1001	probably damaging	1	ENST00000358927.7
V2R_HUMAN	181	R/C	ECL2	R181	rs104894757	18790498	X:153906047	X:153906047	T	C/T	-		SNP	dbSNP	Cited~Phenotype_or_Disease	pathogenic	missense variant	31	deleterious	0.03	916	probably damaging	0.915	ENST00000646375.1
V2R_HUMAN	185	G/C	ECL2	G185	rs104894748	18790489	X:153906059	X:153906059	T	G/T	-		SNP	dbSNP	Cited~Phenotype_or_Disease	pathogenic	missense variant	61	tolerated	0.06	780	possibly damaging	0.779	ENST00000646375.1
V2R_HUMAN	201	G/D	5.34x35	G201	rs104894755	18790496	X:153906108	X:153906108	A	G/A	-		SNP	dbSNP	Cited~Phenotype_or_Disease	pathogenic	missense variant	1	deleterious	0	1001	probably damaging	1	ENST00000646375.1
V2R_HUMAN	203	R/C	5.36x37	R203	rs104894750	18790491	X:153906113	X:153906113	T	C/T	-		SNP	dbSNP	Cited~Phenotype_or_Disease	pathogenic	missense variant	1	deleterious	0	988	probably damaging	0.987	ENST00000646375.1
V2R_HUMAN	205	Y/C	5.38x39	Y205	rs104894749	18790490	X:153906120	X:153906120	G	A/G	-		SNP	dbSNP	Cited~Phenotype_or_Disease	pathogenic	missense variant	1	deleterious	0	1001	probably damaging	1	ENST00000646375.1
V2R_HUMAN	280	Y/C	6.44x44	Y280	rs104894752	18790493	X:153906345	X:153906345	G	A/G	-		SNP	dbSNP	Cited~Phenotype_or_Disease	pathogenic	missense variant	21	deleterious	0.02	745	possibly damaging	0.744	ENST00000646375.1
V2R_HUMAN	285	A/P	6.49x49	A285	rs193922122	47822471	X:153906359	X:153906359	C	G/C	-		SNP	dbSNP	Cited~Phenotype_or_Disease	likely pathogenic	missense variant	1	deleterious	0	996	probably damaging	0.995	ENST00000646375.1
V2R_HUMAN	321	N/K	7.49x49	N321	rs193922123	47822472	X:153906575	X:153906575	A	C/A	-		SNP	dbSNP	Phenotype_or_Disease	likely pathogenic	missense variant	1	deleterious	0	1001	probably damaging	1	ENST00000646375.1

## Sheet: Data from PubMed
Receptor	Variant ID	Residue (GPCRdb Numbering)	Polymorphisms	Diseases	Notes	PubMed ID
CLTR2_HUMAN	--	3x43	L129Q	Uveal melanoma	Leu129Gln CysLT2R is a gain-of-function mutant that primarily couples through Gαq.	27089179
EDNRB_HUMAN	--	3x53	A202D	Waardenburg syndrome 4A (WS4A)	Loss of function	20127975
EDNRB_HUMAN	--	5x57	F292L	Waardenburg syndrome 4A (WS4A)	Loss of function	12189494
EDNRB_HUMAN	--	7x50	P383L	Hirschsprung disease 2 (HSCR2)	Loss of cell membrane location; new cytoplasmic location	10964697
EDNRB_HUMAN	rs772345263	8x50	F393L	Waardenburg syndrome 4A (WS4A)	Loss of function	20127975
GNRHR_HUMAN	--	2x46	L83V	Hypogonadotropic hypogonadism 7 with or without anosmia (HH7)	Complete loss of function	17074994
GNRHR_HUMAN	--	7x53	Y323C	Hypogonadotropic hypogonadism 7 with or without anosmia (HH7)	Loss-of-function, impaired G protein-coupling	22679506
KISSR_HUMAN	--	5x57	C223R	Hypogonadotropic hypogonadism 8 with or without anosmia (HH8)	Loss of function	15598687
LSHR_HUMAN	--	6x41	I575L	Familial male precocious puberty (FMPP)	Gain of function	8812739
LSHR_HUMAN	--	6x44	D578E	Familial male precocious puberty (FMPP)	Gain of function	9973550
MC4R_HUMAN	--	2x50	D90N	Obesity	Loss of function	14633860, 20462274
MC4R_HUMAN	--	2x50	D90A	Obesity	Loss of function	16820227
MC4R_HUMAN	--	3x28	I125K	Obesity	Loss of function	12646665, 12588803
MC4R_HUMAN	--	3x39	S136P	Obesity	Loss of function	18801902
MC4R_HUMAN	--	3x39	S136F	Obesity	Loss of function	18801902, 19298524, 17286227
MC4R_HUMAN	rs151102515	3x40	I137T	Obesity	Loss of function	10078568, 16752916
MC4R_HUMAN	rs754646857	3x49	D146N	Negatively associated with obesity	Gain of function, significantly increased pERK1/2 level upon stimulation	18559663, 23791567
MC4R_HUMAN	--	4x50	W174C	Obesity	Loss of function	19298524, 19298524, 15951321
MC4R_HUMAN	rs193922686	5x62	I226T	Obesity	Loss of function	14764818
MC4R_HUMAN	rs772393451	6x40	L250Q	Negatively associated with obesity	Gain of function, significantly increased pERK1/2 level upon stimulation	10903341, 23791567
MC4R_HUMAN	--	7x49	D298A	Obesity	Loss of function	16820227
MC4R_HUMAN	rs760199460	7x49	D298N	Obesity	Loss of function	17376547, 19366786
MC4R_HUMAN	--	7x52	I301T	Obesity	Loss of function	10903341
MC4R_HUMAN	--	7x53	Y302F	Obesity	Loss of function	19214805
MC4R_HUMAN	rs762251697	7x54	A303T	Obesity	Loss of function	18801902
MTR1B_HUMAN	rs61746674	3x50	R138C	Diabetes, type 2	No ERK activation	22286214, 20200315
OPSD_HUMAN	--	1x53	T58M	Retinitis pigmentosa 4 (RP4)	Loss of function	25265376
OPSD_HUMAN	--	3x40	L125R	Retinitis pigmentosa 4 (RP4)	Loss of function	1358680
OPSD_HUMAN	--	3x46	L131P	Retinitis pigmentosa 4 (RP4)	Loss of function	7981701, 7987331
OPSD_HUMAN	--	3x50	R135G	Retinitis pigmentosa 4 (RP4)	Loss of function	8317502
OPSD_HUMAN	rs984572250	5x51	M216R	Retinitis pigmentosa 4 (RP4)	Loss of function	9010870
OPSD_HUMAN	--	5x51	M216K	Retinitis pigmentosa 4 (RP4)	Loss of function	8081400
OPSD_HUMAN	rs766161322	5x55	F220C	Retinitis pigmentosa 4 (RP4)	Loss of function	8406457
OPSD_HUMAN	rs141956356	5x55	F220L	Retinitis pigmentosa 4 (RP4)	Loss of function	8317502, 10967073
OPSD_HUMAN	--	5x57	C222R	Retinitis pigmentosa 4 (RP4)	Loss of function	8406457, DOI: 10.1016/S1350-9462(96)00021-3
PKR2_HUMAN	rs371564610	7x54	V334M	Hypogonadotropic hypogonadism 3 with or without anosmia (HH3)	Loss-of-function	25077900
TSHR_HUMAN	--	2x43	M453R	Hyperthyroidism, non-autoimmune (HTNA)	Gain of function, constitutive activation	24608569
TSHR_HUMAN	--	3x43	L512E	Hyperthyroidism, non-autoimmune (HTNA)	Gain of function, constitutive activation	11434721
TSHR_HUMAN	--	3x43	L512R	Hyperthyroidism, non-autoimmune (HTNA)	Gain of function, constitutive activation	11434721
TSHR_HUMAN	--	3x43	L512Q	Hyperthyroidism, non-autoimmune (HTNA)	Gain of function, constitutive activation	16960398
TSHR_HUMAN	rs756016910	3x50	R519C	Hypothyroidism, congenital, non-goitrous, 1 (CHNG1)	Loss of function, inactivating mutations	16756469
TSHR_HUMAN	--	3x50	R519G	Hypothyroidism, congenital, non-goitrous, 1 (CHNG1)	Loss of function, inactivating mutations	16756469
TSHR_HUMAN	rs1054708	5x58	Y601N	Hyperthyroidism, non-autoimmune (HTNA)	Gain of function, constitutive activation	10691307
TSHR_HUMAN	--	6x37	M626I	Hyperthyroidism, non-autoimmune (HTNA)	Gain of function, constitutive activation	16339276
TSHR_HUMAN	--	6x41	I630M	Hyperthyroidism, non-autoimmune (HTNA)	Gain of function, constitutive activation	15876166
TSHR_HUMAN	--	6x41	I630L	Hyperthyroidism, non-autoimmune (HTNA)	Gain of function, constitutive activation	9253356
TSHR_HUMAN	--	6x44	D633E	Hyperthyroidism, non-autoimmune (HTNA)	Gain of function, constitutive activation	19550078, 8045989
TSHR_HUMAN	--	6x44	D633Y	Hyperthyroidism, non-autoimmune (HTNA)	Gain of function, constitutive activation	19550078, 8045989
TSHR_HUMAN	--	6x44	D633A	Hyperthyroidism, non-autoimmune (HTNA)	Gain of function, constitutive activation	9253356, 27921237
TSHR_HUMAN	--	7x45	N670S	Hyperthyroidism, non-autoimmune (HTNA)	Gain of function, constitutive activation	22763653, 16513835
TSHR_HUMAN	--	7x52	L677V	Hyperthyroidism, non-autoimmune (HTNA)	Gain of function, constitutive activation	10037070
V2R_HUMAN	--	2x45	H80R	Nephrogenic diabetes insipidus(NDI)	Loss of function	8045948
V2R_HUMAN	--	2x46	L81F	Nephrogenic diabetes insipidus(NDI)	Loss of function	9853256
V2R_HUMAN	--	3x39	S126F	Nephrogenic diabetes insipidus(NDI)	Loss of function	16502494+8037205
V2R_HUMAN	--	3x40	S127F	Nephrogenic diabetes insipidus(NDI)	Loss of function	10820168, DOI:10.1530/endoabs.49.EP804
V2R_HUMAN	--	3x43	I130L	Nephrogenic diabetes insipidus(NDI)	Loss of function	17020465
V2R_HUMAN	--	3x43	I130N	Nephrogenic syndrome of inappropriate antidiuresis (N-SIAD)	Gain of function, constitutive activation	26131744
V2R_HUMAN	--	4x50	W164R	Nephrogenic diabetes insipidus(NDI)	Loss of function	15319430
V2R_HUMAN	--	4x50	W164S	Nephrogenic diabetes insipidus(NDI)	Loss of function	8037205
V2R_HUMAN	--	5x62	F229V	Nephrogenic syndrome of inappropriate antidiuresis (N-SIAD)	Gain of function, constitutive activation	22956819
V2R_HUMAN	--	6x37	T273M	Nephrogenic diabetes insipidus(NDI)	Loss of function	27601473
V2R_HUMAN	--	6x41	V277A	Nephrogenic diabetes insipidus(NDI)	Loss of function	7987330, 9027323
V2R_HUMAN	--	7x45	N317K	Nephrogenic diabetes insipidus(NDI)	Loss of function	10694923, 9853256
V2R_HUMAN	--	7x49	N321Y	Nephrogenic diabetes insipidus(NDI)	Loss of function	9853256
V2R_HUMAN	--	7x49	N321D	Nephrogenic diabetes insipidus(NDI)	Loss of function	10820168
V2R_HUMAN	--	7x50	P322S	Nephrogenic diabetes insipidus(NDI)	Loss of function	8929875
V2R_HUMAN	--	7x50	P322H	Nephrogenic diabetes insipidus(NDI)	Loss of function	8929875
V2R_HUMAN	--	7x50	P322L	Nephrogenic diabetes insipidus(NDI)	Loss of function	17371330
V2R_HUMAN	rs782100915	7x52	I324M	Nephrogenic diabetes insipidus(NDI)	Loss of function	27565746
