# Supplementary material for: Common activation mechanism of class A GPCRs
Source: eLife. 2019 Dec 19;8:e50279. doi: 10.7554/eLife.50279 (PMC6954041; doi:10.7554/eLife.50279)
Supplement: Figure 2—source data 1. [file elife-50279-fig2-data1.xlsx]

## Sheet: table1
Figure 2-Source data 1. Calculated RRCS of 34 residue pairs constituting the common activation pathway for released class A GPCR structures.
Notes: Three types of RRCS were neglected in our research (yellow background) if one or two residues of the residue pair satisfy any bellow conditions: (1) missing atoms in the determinated structure (label with a); (2) the RSR is over 0.35 (label with b); (3) introduced mutation during structure determination (label with c);
ID	Receptor	PDB ID	Resoultion (Å)	State	RRCSTM3-TM6 (3x43:6x40, 3x43:6x41, 3x46:6x37, 3x50:6x37)	RRCSTM3-TM7 (3x43:7x49,3x43:7x53, 3x46:7x53, 3x50:7x53)	RRCSTM5-TM6 (5x51:6x44, 5x55:6x41, 5x58:6x40, 5x62:6x37)	1x49:7x50	1x53:7x53	1x53:7x54	2x43:7x53	2x46:2x50	2x50:3x39	2x50:7x49	3x40:6x48	3x43:6x40	3x43:6x41	3x43:7x49	3x43:7x53	3x46:3x50	3x46:6x37	3x46:7x53	3x49:3x50	3x50:3x53	3x50:6x37	3x50:7x53	3x51:5x57	5x51:6x44	5x55:6x41	5x58:6x40	5x62:6x37	6x40:7x49	6x44:6x48	6x44:7x45	6x48:7x45	7x45:7x49	7x50:7x55	7x52:7x53	7x53:8x50	7x54:8x50	7x54:8x51
1	OPSD_BOVIN (bRho)	1F88	2.8	Inactive	6.30617	0	0	2.45687	0.70751	0.72291	5.9888	0.06535	0	0	0	1.83849	1.16273	0	0	0	0.67304	0	5.12931	0	2.63191	0	0.91021	0	0	0	0	0.85011	4.64545	0	2.74909	0	0	0	12.5662	2.53301	2.96906
		1GZM	2.7	Inactive	6.12245	0	0	1.48554	0.86886	0	10.8981	0.25086	0	0	0	1.78183	1.87603	0	0	0	1.24314	0	6.03223	0.36502	1.22145	0	0.69717	0	0	0	0	2.16894	6.79115	0	4.06801	0	0	0	17.1276	1.40997	5.74238
		1HZX	2.8	Inactive	1.69322	0	0	1.48904	0.66131	0	12.0917	0	0	0.01609	0	0.37387	1.06245	0	0	0	0.2569	0	5.72747	3.73171	0	0	1.01391	0	0	0	0	1.13602	6.93188	0	3.44729	0	0	0	11.269	0.61274	6.33891
		1L9H	2.6	Inactive	5.21285	0	0	3.06349	0.32302	0	8.26574	0	0	0.03421	0	1.95379	1.46456	0	0	0	1.7945	0	6.79046	3.96749	0	0	1.80531	0	0	0	0	1.26661	6.89302	0	2.95974	0	0	0	11.0507	0.40419	6.32694
		1U19	2.2	Inactive	4.33722	0	0	1.45009	0.27334	0.11472	7.3975	0.01244	0	0.13594	0	1.21294	0.94606	0	0	0	1.41154	0	3.73414	3.31467	0.76668	0	1.63307	0	0	0	0	1.22899	8.09688	0	3.05499	0	0	0	14.8533	1.33302	6.6994
		2G87	2.6	Inactive	5.53885	0	0	1.57233	0.13726	0.16102	7.22041	0.03959	0	0.13954	0	1.34279	1.03179	0	0	0	1.41749	0	3.81989	2.87238	1.74678	0	1.27787	0	0	0	0	1.08574	6.13149	0	2.71519	0	0	0	13.0999	1.60924	6.39794
		2HPY	2.8	Inactive	4.26187	0	0	1.99577	0.1479	0.34495	4.81215	0	0	0	0	1.94981	1.50221	0	0	0	0.05307	0	6.0407	3.14792	0.75678	0	1.46334	0	0	0	0	3.1252	9.56517	0	4.0747	0	0	0	11.8068	3.14419	3.092
		2J4Y	3.4	Inactive	5.87999	0	0	1.95926	1.47225	0	8.53563	1.70994	0	0	0	1.32724	0.28976	0	0	0	1.62092	0	4.76775	1.69364	2.64207	0	1.78479	0	0	0	0	3.45476	5.87998	0	4.92731	0	0	0	17.8375	3.25587	6.54048
		2PED	3	Inactive	4.6443	0	0	1.73779	0.35481	0.20765	7.61567	0.13546	0	0	0	0.96547	1.89369	0	0	0	1.32229	0	7.76099	2.98524	0.46285	0	1.77342	0	0	0	0	1.95516	10.2059	0	3.76461	0	0	0	15.7112	1.13398	4.72979
		3C9L	2.7	Inactive	5.86472	0	0	1.41907	0.87867	0	11.4226	0.23184	0	0	0	1.83192	1.63611	0	0	0	1.1699	0	6.00685	0.3375	1.22679	0	0.74568	0	0	0	0	2.04933	6.89804	0	4.07272	0	0	0	16.1171	1.32092	5.94461
		3C9M	3.4	Inactive	3.03443	0	0	1.23008	1.34575	0	9.54672	0.8538	0	0	0	0.78069	0	0	0	0	1.10256	0	6.73587	1.86177	1.15118	0	0.30771	0	0	0	0	3.71346	9.70143	0	3.79697	0	0	0	18.5789	2.64852	6.77546
		3OAX	2.6	Inactive	4.60003	0	0.13848	1.22543	0.65204	0.13363	9.66684	0.08628	0	0	0	1.386 b	1.263 b	0 b	0 b	0 b	1.547 b	0 b	7.82304	3.96334	0.40341	0	1.49709	0	0.13848	0	0 b	1.25199	7.33241	0	3.86629	0	0	0	15.4309	1.15056	5.98926
		3CAP	2.9	Intermediate	0	11.3706	11.0577	1.49818	0	1.90664	2.32308	1.09078	0.29221	0.00515	2.74366	0	0	1.76238	7.38335	7.22706	0	1.70594	0	0	0	0.51894	5.21358	1.09391	2.46385	5.85516	1.64481	0	0.74889	0	0	1.19115	3.996	1.48765	0	4.32324	0
		3PXO	3	Intermediate	0	9.71671	7.33824	1.53977	0	2.5188	2.30071	1.22246	0.29713	0.03941	6.45164	0	0	1.31638	6.8938	7.32719	0	1.28238	0	0	0	0.22415	6.04499	0.16737	1.94952	4.19586	1.02549	0	2.85856	0	0	2.3538	3.46935	2.0282	0	2.38734	0
		4X1H	2.3	Intermediate	0	7.89958	9.44687	3.37934	0	3.46048	1.43241	1.76309	0.45547	0	4.06284	0	0	1.06948	4.7407	6.59803	0	1.65998	0	0	0	0.42942	4.76434	1.02037	1.71352	5.03687	1.67611	0	1.87874	0	0	1.5522	2.54146	1.3791	0	4.73202	0.47125
		5DYS	2.3	Intermediate	0	8.10313	8.62459	1.38233	0	2.76915	1.78905	1.49975	0.31203	0	5.81663	0	0	1.31746	4.72663	6.98062	0	1.57404	0	0	0	0.485	5.35438	0.83655	1.98	4.42428	1.38376	0	2.7171	0	0	1.88585	2.84768	1.03779	0	4.14787	0
		5EN0	2.8	Intermediate	0	8.33484	8.01641	1.66257	0	3.25838	1.71917	1.08533	0.44892	0	7.16891	0	0	1.77044	4.48701	6.71615	0	1.92879	0	0	0	0.1486	4.76828	1.79962	2.08467	2.58375	1.54837	0	2.46616	0	0	1.58432	2.77761	1.83982	0	3.17614	0.31211
		5TE3	2.7	Intermediate	0	9.08899	9.37237	1.41478	0	2.29947	2.13113	1.81328	0.46563	0.0798	4.57426	0	0	1.03562	6.39321	7.93519	0	1.37042	0	0	0	0.28974	5.71867	1.75931	1.8932	3.96374	1.75612	0	1.21051	0	0	1.95889	3.03853	1.20707	0	5.53546	0
		6FK6	2.36	Intermediate	0	8.60885	10.1341	1.36487	0	3.39268	1.51925	1.70582	0.53957	0	0	0	0	1.21272	5.40647	8.01932	0	1.47036	0	0	0	0.5193	5.60563	3.26588	1.9455	3.23866	1.68406	0	2.25009	0	0	1.29493	2.24559	1.02376	0	4.82936	0.18211
		6FK7	2.62	Intermediate	0	7.73216	9.81446	0.97247	0	4.48491	1.05247	1.37678	0.57414	0	0	0	0	1.02082	4.91799	7.77445	0	1.29541	0	0	0	0.49794	5.63217	3.08595	1.65815	3.23307	1.83729	0	3.41505	0	0	1.52804	3.9049	1.07331	0	6.1263	0.04428
		6FK8	2.87	Intermediate	0	9.47226	8.07513	1.30556	0	3.80089	1.63179	1.15758	0.47675	0	0	0	0	1.38667	5.59407	6.88619	0	1.51454	0	0	0	0.97698	5.83702	3.08822	2.29377	0.8768	1.81634	0	2.65841	0	0	1.4127	3.29269	1.16561	0	5.18577	0.03386
		6FK9	2.63	Intermediate	0	9.68333	8.73752	0.96315	0	3.34616	1.55168	1.31815	0.56959	0	0	0	0	1.65134	5.88554	8.12759	0	1.20641	0	0	0	0.94004	6.46959	3.41581	2.14954	1.2313	1.94087	0	2.40324	0	0	1.10364	3.79254	1.00429	0	5.08219	0.000619
		6FKA	2.7	Intermediate	0	7.51724	8.32984	1.27891	0	3.55283	2.06469	1.07641	0.4755	0	0	0	0	1.51465	4.04222	8.01506	0	1.36226	0	0	0	0.59811	6.26456	3.12401	2.15033	1.09443	1.96107	0	3.02665	0	0	1.12112	2.92548	1.16595	0	4.87724	0.27348
		6FKB	3.03	Intermediate	0	8.64267	7.65445	1.29239	0	3.83444	1.28093	1.11212	0.556	0.03276	0	0	0	1.40178	5.13051	6.79768	0	1.15854	0	0	0	0.95184	5.9017	2.81267	1.98917	0.85708	1.99553	0	1.70648	0	0	1.53397	2.77042	1.13702	0	5.77521	0.1073
		6FKC	2.46	Intermediate	0	8.37071	7.97789	1.19859	0	3.89824	1.68089	1.89556	0.46737	0	0	0	0	1.54291	4.72046	7.94354	0	1.37565	0	0	0	0.73169	5.37721	3.36521	2.00856	0.90687	1.69725	0	2.44721	0	0	1.09154	2.53394	1.14931	0	5.73771	0.04478
		6FKD	2.49	Intermediate	0	7.96033	7.9373	1.34688	0	4.08092	1.5834	1.85653	0.59158	0	0	0	0	1.70291	4.07577	6.78234	0	1.43733	0	0	0	0.74432	5.26952	2.62449	2.2897	1.13158	1.89153	0	2.87806	0	0	1.21085	2.93981	1.44606	0	5.98825	0.15952
		2X72	3	Active	0	8.43153	8.17742	1.01682	0	2.50416	1.87515	0.42156	0.36698	0.13502	3.56766	0	0	1.42221	5.47427	4.1661	0	1.50217	0	0	0	0.03288	4.39598	1.70052	2.28898	2.50452	1.6834	0	1.71562	0	0	1.03168	3.34206	2.78288	0	3.28328	0.36588
		3DQB	3.2	Active	0	11.7261	12.3578	1.02523	0	2.95595	3.25031	1.90348	0.3205	0.26427	5.61188	0	0	1.531	8.15418	8.46983	0	1.60437	0	0 b	0	0.43653	3.82144	1.92648	1.86739	6.35227	2.21171	0	2.41147	0	0	2.25163	3.57876	2.6762	0	1.77616	0.32204
		3PQR	2.9	Active	0	10.3416	8.07971	1.16965	0	3.08923	2.25426	0.9589	0.21058	0	7.32944	0	0	1.88007	6.44068	6.92869	0	1.73717	0	0	0	0.28368	4.36006	1.11505	2.03372	3.31934	1.6116	0	4.03474	0	0	2.05512	2.78824	3.18783	0	1.47346	0.31115
		4A4M	3.3	Active	0	8.77183	10.351	1.79416	0	2.64927	1.67584	0.58366	0.3025	0.11723	3.29124	0 c	0	1.91386	5.6012	4.83479	0	1.25677	0	0	0	0	4.18792	1.84897	2.91456	3.631 c	1.9562	0 c	3.89909	0	0	0.93477	3.00435	3.07012	0	3.98781	0.37474
		4BEY	2.9	Active	0	9.54472	11.4282	3.56941	0	2.68939	1.43813	0.85493	0.33665	0	5.54219	0	0	1.51604	6.07034	6.71416	0	1.75473	0	0	0	0.20361	4.82548	2.98962	1.90048	4.57469	1.96343	0	1.58203	0	0	1.70546	3.09431	1.80475	0	3.39052	0.40466
		4BEZ	3.3	Active	0	8.17451	11.6009	3.68626	0	2.89264	1.9367	1.22722	0.34217	0.01532	3.242 b	0	0	1.86878	4.49856	7.35965	0	1.67762	0	0	0	0.12955	4.44208	3.12924	2.56167	4.50302	1.40693	0	0.94373	0	0	1.21109	3.20176	2.73903	0 b	4.564 b	0.20262
		4J4Q	2.7	Active	0	8.28416	12.0326	1.25652	0	2.94156	1.85203	1.67684	0.4066	0.10472	5.44053	0	0	0.98552	4.85137	7.32082	0	1.95765	0	0	0	0.48962	4.43298	2.74408	1.49882	6.16224	1.62747	0	2.05425	0	0	1.91695	2.93234	1.94068	0	3.32139	0.36678
		4PXF	2.8	Active	0	8.07578	12.1439	1.80535	0	3.04232	2.49085	2.13535	0.60136	0.06653	8.44313	0	0	0.96531	5.2083	6.46677	0	1.84502	0	0	0	0.05715	4.56333	1.72569	1.96044	6.9288	1.52898	0	1.74365	0	0	2.56167	2.1473	1.81728	0	1.44197	0.26053
		5WKT	3.2	Active	0	7.1856	10.5745	1.15906	0	4.16931	1.35373	1.64582	0.5948	0.04624	2.56211	0	0	0.65852	4.91209	7.37521	0	1.37666	0	0 b	0	0.23833	5.34822	2.6606	1.50795	4.46434	1.94157	0	0.84384	0	0	2.57514	2.763 b	2.37062	0	6.46774	0.28353
1*	OPSD_HUMAN	4ZWJ	3.3	Active	0	9.04581	6.26843	0.93266	0	1.58317	0.88419	0.87893	0.42631	0	2.83295	0 c	0	0.75013	6.51558	7.15278	0	1.47664	0	0	0	0.30346	2.57059	2.09387	2.12218	0.173 c	1.87928	0 c	0.95724	0	0	1.22702	3.80536	0.22055	0	3.78661	0.21638
		5W0P	3	Active	0	10.226	10.3551	0.73869	0	1.62852	0.45498	1.52943	0.42409	0	3.38693	0 c	0	0.8502	7.41649	6.86131	0	1.47892	0	0	0	0.48037	3.0643	4.32322	3.39039	1.202 c	1.43995	0 c	1.24572	0	0	1.1835	1.70683	0.54138	0	4.4675	0.03501
		6FUF	3.1	Active	0	11.1016	13.5412	0.760886	0	2.29602	3.47945	1.25269	0.547587	0	3.95967	0 c	0	1.68505	7.22454	7.44911	0	1.85283	0	0	0	0.339197	3.61341	4.12672	3.28303	4.515 c	1.61645	0 c	5.52441	0	0	1.73317	2.65921	0.341264	0	5.03581	0
1**	OPSD_TODPA	2Z73	2.5	Inactive	8.31736	0.30057	0	3.67355	0.09982	0	1.27891	2.33775	2.80766	1.84776	0	2.97659	3.35323	0.30057	0	0.11439	1.01415	0	4.37397	3.778	0.97339	0	1.16503	0	0	0	0	3.58831	9.30677	1.57923	2.07723	0	0	0	3.39265	1.95137	6.32631
		2ZIY	3.7	Inactive	6.62784	0	0	3.25526	0.36562	0	2.93244	0.655 b	4.875 b	1.867 b	0	2.25502	3.64212	0	0	0.73061	0.51899	0	3.93514	6.1e-05	0.21171	0	0.8486	0	0	0 b	0	1.769	7.71718	1.1306	3.07598	0	0	0	2.1884	3.09539	3.07084
		3AYN	2.7	Inactive	8.50493	0.28835	0	3.58358	0	0	1.37694	1.78193	2.75295	1.56837	0	3.04076	3.35524	0.28835	0	0.10354	1.4242	0	4.82854	3.95843	0.68473	0	1.14517	0	0	0	0	3.45967	10.3391	1.74276	2.50759	0	0	0	2.7998	1.40102	6.24383
		4WW3	2.8	Inactive	10.0308	0	0	4.33956	0.55936	0	3.20225	1.99167	2.87427	1.84839	0	3.69986	3.3172	0	0	0.01336	1.74377	0	5.65831	3.22669	1.26996	0	1.0032	0	0	0	0	2.78056	7.23708	1.22093	0.69111	0	0	0	4.07081	1.32601	6.42207
		3AYM	2.8	Intermediate	7.70936	0.30149	0	3.89433	0.15673	0	1.62718	1.94587	2.9742	1.70106	0	2.74124	2.82406	0.30149	0	0.10282	1.0474	0	4.97484	3.69631	1.09666	0	1.26515	0	0	0	0	3.71115	10.3561	1.48321	2.00872	0	0	0	3.54974	1.59817	5.82907
2	ADRB2_HUMAN (β2AR)	2R4R	3.4	Inactive	5.72083	0	0	3.01551	0 a	0	0 a	0	0	0	0 b	0.661 b	3.739 b	0 b	0 ab	1.410 b	0.26456	0 a	4.031 b	0.754 b	1.056 b	0 ab	1.783 b	0	0 b	0 b	0 b	4.10799	5.251 b	0.448 a	0.274 ab	0 a	0 b	0 a	3.125 a	0 a	9.1478
		2R4S	3.4	Inactive	5.67637	0	0	3.293 b	0 a	0 b	0 a	0	0	0	0 b	0.817 b	3.630 b	0 b	0 a	1.356 b	0.239 b	0 a	4.378 b	0.636 b	0.990 b	0 a	1.887 b	0 b	0 b	0 b	0 b	3.982 b	4.878 b	0.394 a	0.213 a	0 a	0 b	0 a	3.223 a	0 a	9.159 a
		2RH1	2.4	Inactive	4.77553	0	0	3.98353	1.80522	0	5.63636	0.15978	0.35496	0.49158	0	0.73161	1.81331	0	0	0.39974	0.80559	0	2.53052	2.59097	1.42502	0	1.13977	0	0	0	0	7.08685	6.90434	4.55724	0.3114	0	0	0	3.24013	0	5.13748
		3D4S	2.8	Inactive	4.88902	0	0	4.11164	1.40322	0	7.02796	0.0302	0.51331	1.69621	0	0.74298	2.57499	0	0	0.24371	0.49496	0	2.61512	1.23934	1.07609	0	1.37534	0	0	0	0	5.5199	6.33205	5.3427	0.88727	0	0	0	3.56738	0	4.547 a
		3KJ6	3.4	Inactive	2.92689	0	0	4.08388	0 a	0	0 ab	0	0 c	1.282 b	0 b	0.778 b	1.948 ab	0 b	0 ab	0 a	0.20074	0 a	0 a	0 a	0 a	0 a	0.663 b	0	0 a	0	0	2.180 b	4.433 b	3.56575	4.618 b	0 b	0	0 a	3.376 a	0 a	4.95852
		3NY8	2.8	Inactive	7.24948	0	0	3.57784	1.18212	0	4.5588	0.06607	0.12205	0.51849	0	1.83619	3.07805	0	0	0.18428	1.14442	0	3.23489	1.78226	1.19082	0	0.77843	0	0	0	0	7.26428	4.70848	2.87896	3.11359	0	0	0	2.20744	0	3.76292
		3NY9	2.8	Inactive	3.19103	0	0	3.86635	1.47866	0	3.6921	0	0.26716	0.43299	0	0.64684	1.13893	0	0	0.15938	0.46161	0	2.44568	1.43127	0.94365	0	0.42373	0	0	0	0	5.03198	6.08214	4.5391	1.03988	0.00833	0	0	2.67842	0	4.95278
		3NYA	3.2	Inactive	5.80145	0	0	4.40463	1.74452	0	7.40942	0	0.44477	1.70143	0	1.2263	2.49866	0	0	0.13756	0.57473	0	2.42114	1.83678	1.50176	0	1.22168	0	0	0	0	2.78249	6.16315	5.4123	1.54141	0	0	0	2.88758	0	2.6412
		5D5A	2.5	Inactive	3.4008	0	0	3.81007	2.12417	0	4.75171	0	0.36334	0.82653	0	0.67484	1.50662	0	0	0.37629	0.25059	0	2.82989	1.72519	0.96875	0	1.00893	0	0	0	0	5.2479	6.69299	5.07198	0.3809	0.15471	0	0	2.78005	0	4.8673
		5D6L	3.2	Inactive	4.53257	0	0	3.90832	1.84546	0	5.10883	0.14851	0.33746	0.59372	0	0.75063	1.81253	0	0	0.35467	0.72986	0	2.24209	2.30324	1.23955	0	1.0354	0	0	0	0	5.64132	6.60599	4.91298	0.40102	0	0	0	3.02241	0	4.80666
		5JQH	3.2	Inactive	4.79909	0	0	4.56699	2.62316	0	4.98447	0.69453	0.49552	2.42362	0	1.10685	1.63686	0	0	0.35988	0.97051	0	3.5502	1.5783	1.08487	0	0.44253	0	0	0	0	3.92973	5.1971	6.81358	1.05264	0	0	0	5.38729	0	6.50284
		5X7D	2.7	Inactive	3.97631	0	0	4.49612	1.69073	0	4.32169	0	0.19874	2.46354	0	0.65421	2.0036	0	0	0.29214	0.5723	0	3.85601	1.69349	0.7462	0	0.7295	0	0	0	0	4.74736	4.5291	4.76083	0.87947	0.42864	0	0	5.93592	2.70116	3.82164
		3PDS	3.5	Intermediate	5.47598	0	0	3.91261	1.88478	0	4.78048	0.08965	0.44413	2.89423	0 b	1.650 b	2.529 b	0 b	0 b	0.30045	0.54027	0	0.52597	0.47402	0.75659	0	1.13757	0 b	0 b	0	0 b	2.04197	5.616 b	5.957 b	0.064 b	0.30356	0	0	1.689 b	0 b	5.46939
		3P0G	3.5	Active	0	4.62825	3.91033	3.54948	0	2.46256	2.13198	2.30003	1.85488	4.87563	3.3363	0	0	1.11574	2.42825	0	0	1.08426	0.43184	0.9113	0	0	3.03724	0.71016	0.84086	2.22128	0.13803	0	0.69504	0.44485	1.92887	1.59419	0	3.08887	0.55398	11.4705	0
		3SN6	3.2	Active	0	10.3247	9.55035	1.25449	0	1.6476	3.45187	3.29657	2.53028	5.18519	3.41086	0	0	2.37345	4.16277	2.1713	0 b	2.75066	0	0	0 b	1.03783	8.16059	1.17557	1.96636	3.943 b	2.465 b	0	0	1.20161	3.17307	2.34844	0.07104	0.9644	0	10.1087	0.208 a
		4LDE	2.8	Active	0	5.35957	3.9638	1.63774	0	1.30328	2.15864	1.10415	1.97723	2.70708	3.4652	0	0	1.21168	3.14993	0.33801	0	0.99796	2.11702	1.97028	0	0	2.03264	1.10537	1.36071	1.49772	0 a	0	0.45367	0.53292	2.64442	4.09372	0	2.3211	0.72285	10.538	0
		4LDL	3.1	Active	0	4.94087	3.78486	0.7146	0	1.3797	2.49924	2.46463	2.09405	2.93578	2.46377	0	0	1.03393	2.76525	0.25401	0	1.14169	1.34443	1.46511	0	0	2.109	0.75128	1.42145	1.60412	0.008 a	0	0.93317	0.60009	3.27999	4.60375	0	2.13733	0.33476	7.72645	0
		4LDO	3.2	Active	0	5.58998	3.70219	0.64071	0	1.58635	2.74169	2.41162	2.24474	3.21337	1.73285	0	0	1.20931	3.01803	0.17823	0	1.36264	1.53501	1.42719	0	0	2.14355	1.01983	1.41001	1.27235	0 a	0	0.76588	0.85561	2.9912	4.31797	0	2.48945	0.21121	8.38814	0
		4QKX	3.3	Active	0	4.40564	3.40066	0.66825	0	1.59346	2.34901	2.49842	2.62105	3.56431	2.91157	0	0	0.69267	3.12994	0.23796	0	0.58303	1.40826	1.02731	0	0	1.80425	1.2618	1.20643	0.93243	0 a	0	0.84915	1.23648	2.14199	3.64737	0	3.7627	0.49814	8.21812	0
3	ACM2_HUMAN (M2R)	3UON	3	Inactive	4.77034	0	0.5451	2.63471	2.15329	0	4.64391	0.13982	0.078	3.56207	0.8924	0.86412	0.26214	0	0	0	1.67328	0	3.22172	2.5887	1.9708	0	1.03416	0.5451	0	0	0	0.6316	9.06167	2.73576	2.21608	0.83075	0	0.17627	4.42551	0.42204	5.54636
		4MQS	3.5	Active	0	11.0311	9.40791	0.24465	0	0.09065	2.46064	2.2594	2.31476	5.25296	1.77204	0	0	1.34747	4.34994	1.97107	0	3.01132	0	0	0	2.32236	1.87487	3.2414	2.42284	2.22253	1.52114	0	3.5033	0.31505	7.53733	3.8156	5.69752	1.4333	0	7.78627	0 a
		4MQT	3.7	Active	0	11.353	8.00464	0.05335	0	0.17463	2.00486	2.54441	1.65253	5.2312	2.32729	0	0	1.5781	4.28091	2.18306	0	2.48171	0	0	0	3.01232	1.6135	3.05224	2.16312	1.08867	1.70061	0	3.83774	0.73933	7.6829	2.51654	5.22088	0.67159	0	7.31582	0 a
4	OPRM_MOUSE (μOR)	4DKL	2.8	Inactive	4.15786	0	0	2.98204	1.62542	0	3.35362	0.07312	0.48584	1.61943	0	0.52565	0.90729	0	0	0	2.46523	0	0.63307	1.57523	0.25969	0	0.8949	0	0	0	0	0.74055	12.4957	4.54319	2.29102	0.6611	0	0	3.02194	0.05362	5.07413
		5C1M	2.1	Active	0	7.35422	4.53507	1.69085	0	1.19228	1.78209	1.94009	3.27712	3.9681	1.59057	0	0	1.0508	1.37826	0.34597	0	3.38591	0.09679	0	0	1.53925	5.77814	1.0868	0.52473	1.06388	1.85966	0	3.91861	1.6488	4.83746	2.99362	6.52185	1.62139	0	7.50984	0.20361
		6DDE	3.5	Active	0	8.87453	2.92008	0	0	1.10453	0	2.99694	2.64025	1.21289	1.8714	0	0	3.34167	2.03782	1.84203	0	2.54048	0	0	0	0.95456	3.33939	1.47782	0	0.26618	1.17608	0	3.38695	2.50307	5.3533	1.63223	1.2336	0	0 a	0.879 a	0 a
		6DDF	3.5	Active	0	6.87529	3.34513	3.39203	0	1.28556	0	0 a	0 a	0 a	2.02992	0	0	0.47643	2.12661	1.62505	0	3.24744	0	0	0	1.02481	4.01154	1.61782	0.11354	0.40571	1.20806	0	3.81119	2.38832	3.47119	3.73242	4.4227	1.66665	0 a	1.333 a	0 a
5	AA2AR_HUMAN (A2AR)	3EML	2.6	Inactive	3.80152	0	0.2118	3.61292	1.57259	0	2.47823	0.37846	0.00571	0.68327	0	0.75559	0.30703	0	0	0.10596	1.54118	0	4.53924	1.77625	1.19772	0	1.50958	0.2118	0	0	0	2.98633	5.68984	6.25803	2.1171	0	0	0	2.50208	0	6.8782
		3PWH	3.3	Inactive	2.13513	0	0.18748	4.84712	1.3524	0	2.39659	1.18558	0.65863	1.25366	0	0.47242	0.845 c	0	0	0.17208	0.571 c	0	1.22072	1.20883	0.247 c	0	1.09249	0.18748	0 c	0	0 c	1.36366	6.34637	7.44629	2.85464	0	0	1.20171	2.7711	0.10755	7.56518
		3REY	3.3	Inactive	4.22189	0	0.20635	4.32744	0.44817	0	3.62255	1.89911	1.44487	2.14271	0	1.59206	1.199 c	0	0	0.22264	0.948 c	0	2.04433	1.04482	0.483 c	0	0.95838	0.20635	0 c	0	0 c	1.38321	7.46288	7.20087	3.64555	0	0	0.53729	1.70038	0.14342	4.84971
		3RFM	3.6	Inactive	2.42451	0	0.11239	4.12321	0.24925	0	2.64386	2.32629	0.87597	1.88041	0	0.79101	0.589 c	0	0	0.30732	0.710 c	0	2.80785	0.79801	0.335 c	0	1.09137	0.11239	0 c	0	0 c	0.95011	7.33134	7.36739	3.00798	0.1856	0	1.08328	3.27913	0.17169	6.10648
		3UZA	3.3	Inactive	3.22733	0	0.12309	4.29459	0.86092	0	1.89079	2.8913	1.61635	1.42632	0	0.9597	1.180 c	0	0	0.27791	0.687 c	0	3.82728	0.16613	0.401 c	0	1.34177	0.12309	0 c	0	0 c	0.62436	6.45912	6.64419	2.09433	0.43703	0	1.13331	3.7689	0.30602	8.96281
		3UZC	3.3	Inactive	2.56403	0	0.18969	4.41102	0.42107	0	3.12544	2.74814	1.13253	1.7707	0 b	0.75138	0.744 c	0	0	0.30007	0.710 c	0	2.98538	0.67348	0.358 c	0	0.90884	0.190 b	0 bc	0	0 c	1.14577	6.896 b	6.69167	2.567 b	0.14758	0 b	0.69805	2.41698	0.13796	5.994 b
		3VG9	2.7	Inactive	5.05867	0	0.18366	4.08541	1.76864	0	2.77748	0.09166	0.80139	1.02857	0	0.8265	1.678 b	0	0	0.15236	1.13979	0	5.2115	2.59625	1.4141	0	2.74012	0.429 b	0 b	0	0	3.41548	3.93584	5.32962	1.86392	0	0	0 b	2.86548	0	7.64464
		3VGA	3.1	Inactive	3.46793	0	0.02049	3.84255	1.09987	0	2.25524	0.12099	0.31526	0.13809	0	0.87453	0.37862	0	0	0.09288	0.88467	0	4.99784	2.29699	1.33011	0	2.49885	0.02049	0	0	0	4.00847	6.86201	3.6521	2.47667	0	0	0	2.18086	0	7.59233
		4EIY	1.8	Inactive	3.70995	0	0.40273	4.0381	1.25329	0	2.95107	0.4603	0.13906	0.69255	0	0.65574	0.49869	0	0	0	1.68548	0	5.09906	2.63415	0.87004	0	0.99305	0.40273	0	0	0	4.59385	6.48842	4.71143	0.84066	0	0	0	2.80698	0	6.30412
		5IU4	1.7	Inactive	3.16457	0	0.22109	3.93379	0.86826	0	3.78896	0.11235	0.09443	0.63958	0	1.07768	1.493 c	0	0	0.03087	0.594 c	0	4.83999	2.16008	0 c	0	0.48069	0.22109	0 c	0	0 c	4.89567	8.28526	5.28621	0.78027	0	0	0	2.87348	0	7.06427
		5IU7	1.9	Inactive	2.89061	0	0.26756	3.99203	1.10254	0	3.86288	0.36607	0.15352	0.70586	0	0.97385	1.327 c	0	0	0	0.589 c	0	4.62851	2.38409	0 c	0	0.60609	0.26756	0 c	0	0 c	5.02557	7.8869	5.26109	0.50519	0.03928	0	0	2.5994	0	6.59697
		5IU8	2	Inactive	3.90034	0	0.13754	4.02335	1.38846	0	3.33831	0.39535	0.13929	0.73335	0	1.47299	1.590 c	0	0	0.12426	0.707 c	0	3.81186	1.5809	0.131 c	0	0.56173	0.13754	0 c	0	0 c	5.82228	8.50778	5.80297	0.54699	0	0	0	2.32968	0	6.56989
		5IUA	2.2	Inactive	2.90531	0	0.20322	3.87179	0.73968	0	2.96228	0.35024	0.1371	0.86583	0	1.14854	1.193 c	0	0	0	0.564 c	0	5.1689	2.40957	0 c	0	0.5702	0.20322	0 c	0	0 c	5.27543	7.84042	5.57588	0.77622	0.03018	0	0	2.12854	0	6.74343
		5IUB	2.1	Inactive	2.80157	0	0.11451	3.93472	0.89123	0	3.53467	0.16096	0.13039	0.64651	0	0.96209	1.200 c	0	0	0.03008	0.639 c	0	3.9755	1.85649	0 c	0	0.47838	0.11451	0 c	0	0 c	5.78531	7.41497	6.24985	0.90674	0.14943	0	0	2.03589	0	7.39783
		5JTB	2.8	Inactive	4.38149	0	0.32462	4.04648	1.56117	0	3.58245	0.32976	0	1.18705	0	0.79959	1.07161	0	0	0.12528	1.5577	0	5.88157	2.38731	0.95259	0	1.05553	0.32462	0	0	0	1.76332	5.43193	5.77508	0.91452	0	0	0	2.70733	0	6.47158
		5K2A	2.5	Inactive	3.81962	0	0.20132	3.45851	1.27547	0	2.61623	0.0878	0.00302	0.69902	0	0.7276	0.63737	0	0	0.000579	1.35859	0	5.19687	1.9929	1.09606	0	0.87429	0.20132	0	0	0	4.85259	4.75744	4.3264	0.54459	0	0	0	2.60055	0	6.41954
		5K2B	2.5	Inactive	3.39292	0	0.15529	3.53192	1.29671	0	2.64645	0.14699	0.07632	0.81076	0	0.67389	0.65162	0	0	0	1.20709	0	4.97302	2.11988	0.86032	0	1.08151	0.15529	0	0	0	4.4687	5.32429	4.79668	0.90351	0	0	0	2.47815	0	6.33001
		5K2C	1.9	Inactive	3.37536	0	0.28102	3.83332	1.31889	0	2.48681	0.13613	0.13951	0.70809	0	0.63214	0.49044	0	0	0.02531	1.31994	0	5.03065	1.99871	0.93284	0	0.79358	0.28102	0	0	0	4.20345	6.02834	4.29913	0.9975	0	0	0	2.84407	0	5.77705
		5K2D	1.9	Inactive	3.4317	0	0.2725	3.82367	1.31563	0	2.47825	0.1364	0.13895	0.72141	0	0.62595	0.58133	0	0	0.03126	1.31282	0	4.89904	2.03204	0.9116	0	0.79439	0.2725	0	0	0	4.18613	5.9706	4.42848	0.94488	0	0	0	2.70608	0	5.61335
		5MZJ	2	Inactive	2.96716	0	0.29822	3.92717	0.95294	0	2.91471	0.31519	0.1489	0.83959	0	1.15489	1.239 c	0	0	0.03637	0.573 c	0	4.18814	2.323	0 c	0	0.60428	0.29822	0 c	0	0 c	5.92844	7.95354	5.70847	0.59796	0	0	0	2.57401	0	7.33005
		5MZP	2.1	Inactive	2.9496	0	0.14868	4.06326	0.99954	0	2.70835	0.07882	0.10684	0.79087	0	1.12841	1.262 c	0	0	0.08159	0.559 c	0	3.44609	2.29278	0 c	0	0.45236	0.14868	0 c	0	0 c	4.61518	7.25947	6.48462	0.38216	0.20136	0	0	2.31496	0	7.26234
		5N2R	2.8	Inactive	3.01924	0	0.49845	4.11113	1.18108	0	3.53602	0.38391	0.26738	0.84214	0	1.23686	1.242 c	0	0	0.10491	0.541 c	0	3.93643	2.16255	0 c	0	0.5487	0.49845	0 c	0	0 c	3.24771	6.68094	5.90848	0.57637	0.09314	0	0	2.34668	0	6.69557
		5NLX	2.1	Inactive	2.9121	0	0.1991	3.55521	1.31746	0	3.33541	0.03852	0.02227	1.03844	0	0.862 a	1.380 ac	0	0	0.19776	0.631 c	0	4.28439	1.77243	0.039 c	0	0.64322	0.1991	0 c	0 c	0 c	4.279 a	7.13174	5.234 a	0.635 a	0 a	0	0	2.13654	0	5.36848
		5NM2	2	Inactive	2.49446	0	0.25736	3.92573	1.00721	0	2.85672	0.20277	0.07135	0.82561	0	0.6891	1.213 c	0	0	0.09504	0.592 c	0	4.24177	2.59547	0 c	0	0.68981	0.25736	0 c	0	0 c	4.88942	7.49085	5.18179	0.678	0.00373	0	0	2.09688	0	7.12251
		5NM4	1.7	Inactive	0	0	0	0	0	0	0	0	0	0	0	0	0 c	0	0	2.40034	0 c	0	0	0	0 c	0	0	0	0 c	0	0 c	0	0	0	0	0	0	0	0	0	0
		5OLG	1.87	Inactive	2.6253	0	0.18646	3.99288	1.05228	0	3.16805	0.37974	0.17102	0.85212	0	0.88343	1.121 c	0	0	0	0.621 c	0	4.44221	2.53752	0 c	0	0.69549	0.18646	0 c	0	0 c	5.55637	8.97715	5.51907	0.54118	0.02798	0	0	2.1716	0	6.31833
		5OLH	2.6	Inactive	4.23529	0	0.16512	3.87812	0.43974	0	2.1835	0.05693	0.06531	1.1235	0	1.16818	2.530 c	0	0	0.01932	0.537 c	0	3.30586	2.27986	0 c	0	0.63826	0.16512	0 c	0	0 c	3.53007	7.52483	5.16921	0.3568	0.15816	0	0	2.44368	0	6.77485
		5OLO	3.1	Inactive	5.42524	0	0.17971	4.47809	0.71701	0	2.49743	0	0.0229	2.50556	0	1.51563	3.244 c	0	0	0.06014	0.665 c	0	3.34069	0.82725	0 c	0	0.5066	0.17971	0 c	0	0 c	3.25359	5.79893	4.69522	0.82879	0.44074	0	0	2.70653	0	4.59201
		5OLV	1.998	Inactive	2.61821	0	0.25916	3.6934	0.84215	0	3.25274	0.36048	0.13528	0.84891	0	0.9774	1.122 c	0	0	0	0.518 c	0	3.75792	2.28658	0 c	0	0.64527	0.25916	0 c	0	0 c	5.77478	8.28785	5.64302	0.77161	0	0	0	2.10251	0	6.10027
		5OLZ	1.9	Inactive	2.67632	0	0.23448	3.94231	0.96038	0	3.43365	0.23229	0.04863	0.60953	0	0.86994	1.227 c	0	0	0.06089	0.579 c	0	3.26149	1.9374	0 c	0	0.4601	0.23448	0 c	0	0 c	6.19231	8.96807	5.43307	0.68058	0	0	0	2.28242	0	6.28337
		5OM1	2.1	Inactive	2.77246	0	0.21409	3.69081	0.97738	0	3.413	0.29102	0.09773	0.84923	0	1.0398	1.243 c	0	0	0	0.490 c	0	3.42751	2.18114	0 c	0	0.60906	0.21409	0 c	0	0 c	5.58945	7.74189	4.94656	0.48742	0	0	0	2.40493	0	6.74092
		5OM4	2	Inactive	2.48389	0	0.1556	3.9191	1.12164	0	3.57479	0.40793	0.06763	0.68606	0	0.82448	1.135 c	0	0	0.00611	0.525 c	0	3.46129	2.09867	0 c	0	0.62726	0.1556	0 c	0	0 c	5.54865	8.49754	5.33037	0.42826	0.0903	0	0	2.64264	0	6.70855
		5UIG	3.5	Inactive	6.48118	0	4.65697	3.24002	1.19281	0	2.30356	1.03421	0.34378	3.26511	0 ab	1.72012	0.52294	0	0	0.431 b	3.142 b	0 b	3.548 b	0.300 b	1.096 b	0 b	0.223 b	2.14537	2.5116	0	0	0.6235	5.740 b	7.45162	3.048 b	0.6389	0	0.1659	2.51245	1.79158	3.90858
		5UVI	3.2	Inactive	3.92302	0	0.21442	3.52486	1.68295	0	3.06337	0.14898	0.16178	2.88236	0	0.87401	0.93882	0	0	0	1.23392	0	4.88342	2.27869	0.87627	0	1.36042	0.21442	0	0	0	1.07969	5.41969	6.62149	0.4434	0	0	0	1.7162	0.33213	7.800 b
		5VRA	2.35	Inactive	3.31217	0	0.31918	3.62099	1.38347	0	2.76853	0.2515	0.10283	0.92104	0	0.61359	0.5007	0	0	0	1.23907	0	5.26995	2.27384	0.95881	0	0.84971	0.31918	0	0	0	2.07309	5.7708	5.54566	0.77973	0	0	0	2.56731	0	7.16811
		6AQF	2.51	Inactive	4.38631	0	0.11237	3.57071	1.39389	0	0.93565	0	0.30901	0.87442	0	0.93653	0.98739	0	0	0	1.55415	0	4.87337	2.3125	0.90824	0	0.70498	0.11237	0	0	0	3.34296	5.15318	5.80111	0.39597	0.11205	0	0	2.8867	0	6.14581
		5WF5	2.6	Intermediate	1.72786	4.49564	4.84567	0	0	0.48166	0.39903	1.608 c	2.917 c	0 c	1.59219	1.72786	0	1.29593	0	0	0	0.10564	3.07189	2.22913	0	3.09407	1.4623	2.82544	2.02023	0	0	7.82303	3.53929	1.18286	4.21843	4.5536	0	0	0	6.34494	0.22565
		5WF6	2.9	Intermediate	0.27778	6.4291	0.97246	0	0	0.39603	0.53918	2.34286	0.589 c	0	3.15816	0.27778	0	2.99651	0	0.22562	0	0.75805	2.18883	1.84494	0	2.67454	0.96799	0.29244	0.68002	0	0	6.95758	5.26745	2.39244	2.12003	3.76341	0	0	0	10.094	0
		2YDO	3	Intermediate	1.72707	8.66772	3.29436	0	0	0.26217	0.76885	0 c	2.63361	3.97295	3.43406	1.31627	0	3.42909	0	0.06914	0	1.95181	3.51561	2.00383	0.4108	3.28682	3.90178	2.02586	1.2685	0	0 b	4.16444	4.65524	1.96901	3.74232	3.98935	0	0	0	3.53562	0
		2YDV	2.6	Intermediate	1.47292	7.82749	2.73945	0	0	0.28856	0.93212	0 c	2.06114	3.42561	3.68631	1.15137	0	3.71217	0	0.10574	0	1.71755	3.31095	2.40929	0.32155	2.39777	3.25909	1.47081	1.26864	0	0	4.90479	4.84542	3.37899	4.4482	4.55097	0	0	0	4.26095	0.0288
		3QAK	2.7	Intermediate	1.58903	5.66648	3.29338	0	0	0.36092	0.93546	0.73635	2.185 b	0.41594	1.73325	1.51176	0	2.82429	0	0	0	0	1.42503	1.24402	0.07727	2.84219	2.14378	2.68196	0.61142	0	0	3.02783	4.78194	5.12802	2.45303	3.27108	0.06184	0	0	8.02362	0.15764
		4UG2	2.6	Intermediate	1.77589	7.761	2.96851	0	0	0.19334	0.79156	0 c	1.71936	3.46947	3.56861	1.17779	0	3.53011	0	0.11224	0	0.93338	3.23249	1.57976	0.5981	3.29751	1.81399	1.4371	1.53141	0	0	4.69594	4.66884	2.10054	4.62926	3.96252	0	0	0	7.27783	0.03475
		4UHR	2.6	Intermediate	1.85862	7.83803	4.27536	0	0	0.4657	1.05389	0 c	2.20466	3.28534	2.08302	1.06326	0	4.19616	0	0.08921	0	0.92897	3.09492	2.28753	0.79536	2.7129	3.324 b	2.58278	1.69258	0	0	5.41235	3.03739	3.28813	5.16733	4.01802	0	0	0	7.77502	0
		5G53	3.4	Active	0	14.2391	9.24516	1.25946	0	0.98086	0	2.17326	2.819 b	3.20699	6.22352	0	0	2.97277	5.69716	2.56967	0	3.74212	0.197	0	0	1.82704	2.96585	2.07371	1.7653	3.29867	2.10748	0	4.59926	0.549 b	3.959 b	6.796 b	0.72823	3.05692	0	5.12253	0
6	OPRK_HUMAN (κOR)	4DJH	2.9	Inactive	6.41034	0	0	3.33058	1.19245	0	4.67285	1.31961	0.07213	3.02858	0	0.76385	0.96402	0	0	0	2.71855	0	1.53218	1.37141	1.96392	0	2.85778	0	0	0 b	0 b	0.87	9.71413	5.26366	1.13259	2.23184	0	0	3.84586	0.28849	4.23291
		6B73	3.1	Active	0	9.62826	4.66996	1.65275	0	1.24479	0	2.47675	2.80748	5.57014	3.0518	0	0	1.25313	4.31266	0	0	1.38446	0	0	0	2.67801	6.00056	2.13661	0	0.60806	1.92529	0	5.92411	2.60705	6.22662	1.65678	4.679 b	0.5682	0	7.08728	0 b
7	5HT1B_HUMAN (5-HT1B)	4IAQ	2.8	Intermediate	3.3648	1.69908	2.40265	3.97232	0	0.21352	7.34949	0.77006	0.99548	1.7079	4.70589	1.52552	0.82864	0.65271	0	0	0.45029	1.04637	0	0.9896	0.56035	0	3.33485	2.40265	0	0	0	0.98837	2.00177	1.7724	2.214	3.1304	0	0	2.30839	2.20809	4.78393
		4IAR	2.7	Intermediate	1.60036	2.68133	3.25657	2.61434	0	0.46669	3.0914	1.87585	2.38083	0.14204	1.23595	1.60036	0	1.53067	0	0	0	1.15066	0	0	0	0	1.92586	2.62452	0.63205	0	0	1.01369	2.85266	1.44247	1.78672	1.91581	0	0	0.63364	3.52639	4.25589
		6G79	3.78	Active	0	14.35404	12.8131	0.18162	0	0.8626	1.159	1.3982	3.07611	2.38564	3.79021	0	0	3.10012	4.36341	2.48115	0	2.82484	0	0	0	4.06567	3.70145	1.93165	1.77788	4.98289	4.1207	0	0.45981	0.74942	1.33307	7.4482	0.046 a	1.53486	0	7.1736	0.71353
8	5HT2B_HUMAN (5-HT2B)	4IB4	2.7	Intermediate	9.44218	4.81816	0	0	0	1.28055	1.51524	1.59239	1.94402	0.24949	0.12194	0	7.94514	4.45679	0	0.1412	0.47783	0.27285	3.01652	1.4513	1.01921	0.08852	0	0	0	0	0	0.20936	3.60931	8.67604	2.43753	0	0	0	0	6.64929	0.309
		4NC3	2.8	Intermediate	5.88412	2.27382	0	0	0	0.63269	1.79599	2.57423	1.86534	0	0.08066	0	5.21117	2.22976	0	0.219 a	0.36854	0.04406	0 a	0 a	0.304 a	0 a	0.88427	0	0	0	0	0.39083	2.61302	5.65932	2.1407	0	0	0	0	6.78039	0.23635
		5TUD	3	Intermediate	1.38203	6.51587	3.44036	0.95119	0 b	0.5282	0.847 b	2.92123	3.38832	1.51722	2.46875	0	0	0.68509	1.962 b	1.60802	0	0.584 b	0	0	1.38203	3.285 b	0.31553	0.79336	2.647	0	0	0	2.11658	0	3.37572	0.33866	0.175 b	1.614 b	0 b	5.09016	0
		5TVN	2.9	Intermediate	6.02386	4.62611	0	0	0	1.13116	1.57321	2.09712	2.00723	0.03203	0.32411	0	4.56506	3.88474	0	0.21528	0.11078	0.55238	0.2297	1.06976	1.34802	0.18899	0.08684	0	0	0	0	0.24732	4.78572	7.94383	1.54805	0	0	0	0	6.78861	0.1834
		6DRX	3.1	Intermediate	9.13532	4.90152	0	0	0	0.74525	2.96624	2.17127	2.19112	0.12329	0.1351	0	8.2126	4.6823	0	0 a	0.58604	0.21922	0 a	0 a	0.337 a	0 a	0.33462	0	0	0	0	0.10233	5.01536	8.70492	1.58923	0	0	0	0	7.79035	0.65092
		6DRY	2.92	Intermediate	4.494	4.13551	0	0	0	0.84007	1.53652	2.13028	2.26558	0	0.00807	0	4.34966	3.7649	0	0 a	0	0.37061	0 a	0 a	0.144 a	0 a	0.04979	0	0	0	0	0.45017	3.87092	8.41695	1.12287	0	0	0	0	5.60077	0.40729
		6DRZ	3.1	Intermediate	6.23862	3.3672	0	0	0	1.10908	0.46085	1.75309	1.4282	0.01994	0	0	5.66571	3.20484	0	0 a	0.00722	0.16236	0 a	0 a	0.566 a	0 a	0.34016	0	0	0	0	0	3.05553	7.06245	1.32946	0	0	0	0	4.95826	0
		6DS0	3.19	Intermediate	7.94182	3.82296	0	0	0	0.80626	2.14322	2.21472	1.62212	0	0.13961	0	6.90313	3.72226	0	0.36939	0.63583	0.1007	2.92592	1.79293	0.40286	0	0.05279	0	0	0	0	0.87419	2.76279	8.955	1.426	0	0	0	0	4.93762	0.38216
9	5HT2C_HUMAN (5-HT2c)	6BQH	2.7	Inactive	7.47013	0	0	3.61327	1.58909	0	4.42591	2.26256	1.89968	1.07953	0	0.76479	3.94837	0	0	0	0.84601	0	0	0	1.91096	0	2.60247	0	0	0	0	2.14056	5.41704	6.656 c	0 c	0.757 c	0	0	3.84042	0.18496	9.18622
		6BQG	3	Intermediate	0.65477	6.49985	2.91643	2.4935	0	0	0.04457	4.00826	3.09424	3.75884	1.38254	0	0	1.62034	0	2.1092	0	0.81161	0	0	0.65477	4.0679	0.5733	0.59207	2.32436	0	0	0	1.56475	0.057 c	4.404 c	3.853 c	0	0.85723	2.70522	2.27598	4.72637
10	ADRB1_MELGA (β1AR)	2VT4	2.7	Inactive	3.09085	0	0	4.5412	1.71762	0	4.14539	0.00323	0.07	0.56259	0	0.60856	1.09703	0	0	0	0.50908	0	5.10721	1.65146	0.87618	0	0.60494	0	0	0 c	0	4.59243	4.23854	4.08152	0.19136	0.13983	0 b	0	3.401 b	0 b	3.05307
		2YCW	3	Inactive	4.1963	0	0	4.80174	3.33855	0	5.74712	0	0.68056	2.97359	0	1.21045	1.072	0	0	0	0.94771	0	6.10011	1.42817	0.96614	0	0.34812	0	0	0 c	0 b	4.1025	3.76578	4.94927	0.1737	0.05094	0	0	3.68047	0	5.475 b
		2YCX	3.3	Inactive	4.36082	0	0	2.27785	1.48401	0	4.29814	0	1.00367	1.24728	0	0.66894	1.24398	0	0	0	1.29628	0	7.52979	1.676 b	1.15162	0	0.38341	0	0	0 c	0 b	1.99814	5.7976	4.72593	0.69848	0.12036	0 b	0	3.601 b	0 b	3.796 b
		2YCY	3.2	Inactive	4.05881	0	0	4.77938	1.3731	0	4.21251	0	0.29721	2.40406	0	0.60169	1.80279	0	0	0.080 b	0.53058	0	2.765 b	1.315 b	1.124 b	0 b	0.157 b	0	0	0 c	0 b	4.05822	3.26077	6.74107	0.06221	0.5385	0 b	0 b	3.929 b	0 b	3.426 b
		2YCZ	3.7	Inactive	5.24452	0	0	5.10887	2.15388	0	3.78041	0	0.49929	2.38239	0	1.09295	1.88242	0	0	0.30994	0.98069	0	6.3847	1.47144	1.28846	0	0.525 b	0 b	0	0 c	0 b	2.05612	2.70226	7.57498	1.12542	0	0 b	0 b	3.603 b	0 b	4.022 b
		3ZPQ	2.8	Inactive	4.40657	0	0	5.27778	2.50791	0	5.17667	0	0.21168	0.64476	0	0.75195	1.56747	0	0	0	1.03312	0	4.68506	2.52526	1.05403	0	0.65272	0	0	0 c	0	2.22014	5.15604	3.93217	0.13268	0.08373	0	0	3.47046	0 b	4.62874
		3ZPR	2.7	Inactive	4.86002	0	0	5.14146	2.08063	0	5.58633	0	0.18682	0.68681	0	0.924	1.54167	0	0	0	1.12343	0	4.68611	2.423 b	1.27092	0	0.687 b	0	0	0 c	0	1.67426	4.61267	3.99848	0.26193	0.00144	0	0	3.37478	0	4.38711
		4AMJ	2.3	Inactive	3.94883	0	0	4.85068	1.73834	0	4.05393	0	0.12536	0.32864	0	0.94773	1.04237	0	0	0	0.75404	0	4.6989	1.68829	1.20469	0	0.97066	0	0	0 c	0 b	2.90539	5.62477	4.10615	0.29749	0	0	0	3.26382	0	4.48783
		4BVN	2.1	Inactive	3.79281	0	0.39615	4.42365	1.59967	0	0.31875	0	0	1.37292	0	0.52831	1.4563	0	0	0.15577	1.01418	0	4.38983	2.46123	0.79402	0	0.65981	0.39615	0	0 c	0	2.06954	5.55146	4.09144	0.83075	0.29593	0	0	4.0642	0	8.722 b
		4GPO	3.5	Inactive	2.45871	0	0.28433	4.58284	1.161 c	0	7.930 c	1.99966	0.83159	4.78206	0 c	0.68201	0.56304	0	0 c	0	1.05421	0 c	0.9729	2.5813	0.15945	0 c	0	0	0	0 bc	0.284 b	0.33945	0.99491	5.48623	0.92996	1.57974	0 b	0 c	8.261 c	0 b	0.024 b
		5A8E	2.4	Inactive	3.798	0	0.09509	4.12489	1.694 c	0	0.488 c	0	0.02437	1.89111	0 c	0.64469	1.14548	0	0 c	0.15809	1.17053	0 c	5.93339	2.34221	0.8373	0 c	0.56808	0.09509	0	0 c	0	2.05404	5.32285	4.81986	0.81193	0.76263	0	0 c	4.666 c	0	8.246 b
		5F8U	3.4	Inactive	6.70069	0	0	5.122 b	1.471 b	0 b	6.433 b	0.49831	0.47751	5.049 b	0	1.349 b	3.815 b	0 b	0 b	0 b	0.660 b	0 b	3.599 b	1.30594	0.878 b	0 b	0.918 b	0	0 b	0 c	0 b	0 b	2.28834	6.94426	0.15986	2.121 b	0 b	0 b	2.955 b	0 b	1.528 b
		2Y00	2.5	Intermediate	3.50876	0	0	5.05505	1.80205	0	4.72021	0.09296	0.0898	0.92876	0	0.74396	1.10131	0	0	0	0.84468	0	4.72133	1.87549	0.81881	0	0.48004	0	0	0 c	0	5.21229	4.41789	4.22118	0.43329	0.08908	0	0	2.8217	0	3.60544
		2Y01	2.6	Intermediate	3.62064	0	0	4.72954	1.74598	0	4.09624	0 a	0.16143	0.60818	0	0.69133	1.02225	0	0	0	0.92807	0	4.52393	1.72267	0.97899	0	0.43176	0	0	0 c	0	5.13605	5.07048	5.06303	0.22874	0.11473	0	0	3.08705	0	4.36061
		2Y02	2.6	Intermediate	3.65597	0	0	5.03546	1.94049	0	4.61163	0.06683	0.16305	0.98352	0	0.76702	1.12616	0	0	0	0.7152	0	4.47857	1.52219	1.04759	0	0.43412	0	0	0 c	0	4.99888	5.03809	5.48476	0.44563	0	0	0	3.13235	0	3.92304
		2Y03	2.9	Intermediate	3.75531	0	0	4.80743	1.63524	0	4.22472	0	0.33246	1.15114	0	0.6875	1.35645	0	0	0	0.55673	0	5.21405	1.88541	1.15463	0	0.35342	0	0	0 c	0	4.19263	4.6323	5.63189	0.28305	0	0	0	3.56513	0	4.36663
		2Y04	3.1	Intermediate	3.67197	0	0	4.82212	1.59337	0	4.87351	0.2942	0.16639	0.76418	0	0.67042	1.30228	0	0	0	0.79431	0	4.19795	1.65685	0.90496	0	0.61281	0	0	0 c	0	3.73572	5.17611	5.42504	0.42078	0	0	0	3.60457	0	3.5422
		4AMI	3.2	Intermediate	5.32336	0	0	4.44679	2.17641	0	4.4346	0	0.2963	0.61318	0	1.15453	2.05872	0	0	0.03796	0.94894	0	4.2711	1.06667	1.16117	0	0.85216	0	0	0 c	0 b	3.05766	5.60308	4.87475	0.44672	0	0	0	3.04382	0	5.232 b
11	OPRD_HUMAN (δOR)	4N6H	1.8	Inactive	3.42777	0	0	2.72016	0.89839	0	4.09701	0.158	0.13854	1.99714	0	0.44347	0.62797	0	0	0	1.22461	0	0.09817	1.32267	1.13172	0	1.45297	0	0	0	0	0.58553	13.8156	3.38181	2.31893	2.35833	0	0	5.19826	0.57655	1.445 a
		4RWA	3.3	Inactive	2.65357	0	0	3.77793	1.02204	0	2.93922	0.28702	0.57725	3.17265	0	0.62962	0.96008	0	0	0	0.67588	0	2.15481	0.35872	0.38799	0	1.26878	0	0	0	0 b	0.28885	9.33102	5.50192	2.64768	1.47815	0 b	0	4.93784	3.50036	6.049 a
		4RWD	2.7	Inactive	4.09486	0	0	3.16075	1.22241	0	2.86923	0.05786	0.08697	2.47369	0	0.69663	0.78112	0	0	0	1.56783	0	0.96043	1.17426	1.04928	0	1.12558	0	0	0	0	0.41616	7.89943	4.90913	1.8678	3.54589	0	0	5.366	1.12581	2.716 a
11*	OPRD_MOUSE (δOR)	4EJ4	3.4	Inactive	7.30004	0	0	2.63407	1.1104	0	4.36598	0.2811	1.06815	2.75746	0	0.8985	3.37237	0	0	0	1.79478	0	0	0.64284	1.23439	0	3.00858	0	0	0	0	0.48255	11.2565	3.11741	2.53502	0.8586	0	0	2.237 b	0 b	3.13028
12	OPRX_HUMAN (NOP)	4EA3	3	Inactive	5.48356	0	0	3.28294	0.83004	0	5.20822	0.10098	0	1.75015	0	0.81274	1.22758	0	0	0	1.09585	0	1.64993	1.06766	2.34739	0	1.47709	0	0	0	0	1.34523	5.67162	5.59307	1.75669	0.10985	0	0	3.31842	0.01367	5.07472
		5DHG	3	Inactive	5.60387	0	0	4.04455	1.02599	0	6.17511	0	0	2.4251	0	0.72404	1.24243	0	0	0	1.85712	0	2.748	2.0291	1.78028	0	1.27675	0	0	0	0	0.74107	6.04496	5.23168	1.81935	0	0	0	2.63801	0.11471	4.14092
		5DHH	3	Inactive	5.62421	0	0	2.51292	0.56732	0	8.82076	0	0.29948	1.9999	0	0.53918	1.59587	0	0	0	1.42576	0	1.12577	1.32899	2.0634	0	1.02885	0	0	0	0	0.94975	5.70389	5.11042	1.84805	0.17297	0	0	3.80378	0	3.86349
13	AA1R_HUMAN (A1AR)	5N2S	3.3	Inactive	0.94525	0	0	2.3372	1.53351	0	0	1.4539	0.36706	3.1219	0	0.22759	0.401 c	0	0	0.11262	0.316 c	0	1.44765	5.87141	0 c	0	0.62751	0	0 c	0	0 c	0.60575	8.96618	5.72474	0.60086	2.28571	0	0	0	0	0
		5UEN	3.2	Inactive	4.70907	0	1.01386	4.24639	1.653 b	0	5.894 b	0.325 b	0.29148	1.42787	0	0.684 b	0 b	0	0 b	0.143 b	1.837 b	0 b	0.34739	7.7821	2.118 b	0 b	0.72446	0.238 b	0.776 b	0 b	0 b	3.470 b	7.995 b	4.309 b	1.53671	0	0 b	0 b	2.583 b	0 b	5.10951
		6D9H	3.6	Active	0	5.09985	8.82118	0.48339	0	0.90339	0	0.48414	0	1.20173	6.3294	0	0	0.39275	2.69251	0.6157	0	1.11265	0	0	0	0.90194	1.13772	3.99632	2.45369	1.60162	0.76955	0	4.77651	0.23276	5.29935	4.83159	1.80914	1.07421	0	7.63757	0
14	AGTR1_HUMAN (AT1R)	4YAY	2.9	Inactive	8.15827	0	0	3.76956	3.38658	0	3.60058	1.10382	0.62089	3.24333	0	1.22433	1.85883	0	0	0	3.26519	0	1.77962	1.52716	1.80992	0	4.26145	0 a	0	0	0	3.64903	4.14379	2.54599	0.08704	2.63512	0	0	0	0	0
		4ZUD	2.8	Inactive	6.70204	0	0	3.78661	4.60314	0	6.75702	1.41911	0.07825	1.22913	0	1.0052	1.64261	0	0	0	3.11111	0	2.99414	2.20742	0.94312	0	2.5275	0	0	0	0 a	2.71058	1.8017	4.56292	0	4.05791	0	0	0 a	0 a	0 a
15	AGTR2_HUMAN (AT2R)	5UNF	2.8	Intermediate	0	11.0066	1.9925	2.76106	0	3.0979	1.62161	2.52865	2.45318	4.24969	0.13478	0	0	1.7048	1.88247	0.35682	0	3.88171	0	0	0	3.53765	2.38682	1.34938	0.64312	0	0 b	0	1.40142	0.24505	2.24996	2.11955	10.463 b	1.18892	0 b	0 b	0 b
		5UNG	2.8	Intermediate	0	9.29836	1.87161	1.98514	0	1.89859	1.63161	2.96022	2.91456	4.49097	0.77849	0	0	3.21297	2.56589	0.74779	0	2.30007	0	0	0	1.21943	4.46722	1.60806	0.26355	0	0	0	1.63424	0.85672	2.71393	2.02421	7.13356	0.38819	0	0	0 a
		5UNH	2.9	Intermediate	0	11.0066	1.9925	2.76106	0	3.0979	1.62161	2.52865	2.45318	4.24969	0.13478	0	0	1.7048	1.88247	0.35682	0	3.88171	0	0	0	3.53765	2.38682	1.34938	0.64312	0	0	0	1.40142	0.24505	2.24996	2.11955	10.4634	1.18892	0	0	0 a
		5XJM	3.2	Intermediate	0	11.5188	0.29222	0.4964	0	1.26649	2.14311	0.63159	3.61061	0.6376	0.86175	0	0	3.0591	1.93816	0 b	0	3.18875	0 b	0 b	0 b	3.333 b	3.314 b	0.29222	0	0 b	0 b	0	1.03765	2.32979	4.0632	1.51979	0.666 b	0.01221	0	0	0
16	APJ_HUMAN (APJ)	5VBL	2.6	Inactive	9.08178	0	0	3.5098	0.67796	0	2.69249	0.1453	0.18649	1.9841	0 c	0.91604	1.97765	0	0	0	4.41507	0	2.3035	0.85545	1.77302	0	0.96053	0	0	0	0	2.19552	2.643 c	2.51898	2.771 c	0.01249	0	0	5.37187	1.72721	3.7389
17	Q9WTK1_CAVPO (BLT1)	5X33	3.7	Inactive	4.34889	0	0	2.76949	1.98438	0	4.75315	1.83716	1.71655	1.44112	0	0.83903	2.05689	0	0	0	1.45297	0	0	0	0	0	3.997 b	0	0	0	0	0	8.893 b	0.43019	3.816 b	0	0	0.15067	0 a	0 a	0 a
18	C5AR1_HUMAN (C5aR1)	5O9H	2.7	Inactive	2.85731	0	0	1.96049	0.90862	0	3.58775	0	0.70365	2.33889	0	0.77452	0.71415	0	0	0.22428	1.19218	0	0	3.03744	0.17646	0	1.18895	0	0	0	0	2.78524	5.16925	4.83379	3.96914	0	0	0.22094	0	0	0 b
		6C1Q	2.9	Inactive	2.04344	0	0	1.91892	1.02278	0	3.47538	0	0.54368	2.69532	0	0.9016	0.59114	0	0	0.17197	0.5507	0	0	1.74437	0	0	1.02847	0	0	0	0	2.57286	6.03068	5.12959	4.68351	0	0	0.29057	0 a	0 a	0 a
		6C1R	2.2	Inactive	2.96238	0	0	2.73723	1.24334	0	3.08252	0	0.48429	2.20481	0	1.08935	1.02713	0	0	0.20631	0.8459	0	0	1.90266	0	0	2.21227	0	0	0	0	2.91783	4.84497	4.91742	4.00634	0	0	0.41383	0 a	0 a	0
19	CNR1_HUMAN (CB1)	5TGZ	2.8	Inactive	2.41434	0	2.48775	4.50966	0.84763	0	2.11208	0	0.20152	3.74909	0	0.62773	0.47954	0	0	0 c	0.665 c	0 c	4.12657	3.81039	0.64202	0	2.11159	0.71664	1.77111	0	0	0.48062	0	2.2825	1.97286	2.25431	0	0	0.62723	0	3.03435
		5U09	2.6	Inactive	4.14782	0	0.45817	4.55151	1.14754	0	0.84879	0.29742	0	3.15453	0	0.93017	1.16811	0	0	0 c	1.403 c	0 c	5.06366	3.87956	0.64633	0	0	0	0.45817	0	0	1.66928	3.1492	3.20899	1.92859	3.33708	0	0	3.70898	0.92194	5.48392
		5XR8	3	Intermediate	0	2.18533	5.12983	2.79626	0	0.75212	0.64333	1.50455	1.83485	1.66535	0	0	0	0	1.84949	0 c	0 c	0 c	0	0.35624	0	0.33584	0.86295	0.35432	2.8157	0.55214	1.40767	0	1.74738	0.56663	2.41402	4.30241	2.5029	4.0579	0	3.34491	0
		5XRA	2.8	Intermediate	0	3.02295	4.63747	1.45523	0	0.6708	0.12922	1.23669	2.38681	1.90827	0	0	0	0.41036	2.61259	0 c	0 c	0 c	0	0.18019	0	0	0.88046	0.96174	1.79718	0.564	1.31455	0	1.36697	0.23832	0.43972	2.64207	2.3426	5.09319	0	4.12382	0
20	CCR2_HUMAN (CCR2)	5T1A	2.8	Inactive	7.03124	0	0	3.41887	1.12225	0	1.25343	0.31428	0	2.74113	0	1.50535	2.28423	0	0	0	2.95918	0	2.74687	1.13527	0.28248	0	9.39778	0	0	0	0 c	2.9197	3.07714	4.1003	1.37659	0.82411	0	0	5.4383	1.70243	6.1414
21	CCR5_HUMAN (CCR5)	4MBS	2.7	Inactive	8.97838	0	0	3.85119	2.70124	0	2.03473	0.01783	0	1.17141	0	1.54089	3.51798	0	0	0	2.65203	0	2.1468	1.26931	1.26748	0	5.64396	0	0	0	0	0.74894	5.59084	3.37488	0.61457	1.25964	0	0	4.76771	0	1.068 a
		5UIW	2.2	Inactive	3.82448	0	0	3.93498	1.80562	0	2.08225	0	0	2.0314	0	1.21856	1.27141	0	0	0	1.16973	0	0.31311	1.1621	0.16478	0	9.12627	0	0	0	0 b	0.75582	6.34358	2.69252	2.18443	1.58756	0	0.11439	6.38484	1.91887	2.69356
22	CCR9_HUMAN (CCR9)	5LWE	2.8	Inactive	3.17099	0	0	4.04418	0.95618	0	1.92757	0	0.49128	0.28714	0	0.57488	0.77802	0	0	0.24388	0.55353	0	2.93087	2.30495	1.26456	0	0	0	0	0	0	0.9426	2.52563	7.25642	1.09621	1.37	0	0.01282	5.41343	1.72945	3.38448
23	CXCR4_HUMAN (CXCR4)	3ODU	2.5	Inactive	5.99715	0	0	4.6417	0.49444	0	18.6972	0.88445	0	0	0	0.7392	1.79229	0	0	0	1.25484	0	0.44544	1.46158	2.21082	0	0.66714	0	0	0	0	0.17751	4.0133	2.83294	5.78038	0	0	0	0	0	0
		3OE0	2.9	Inactive	3.92762	0	0	4.92122	0.5005	0	13.9142	1.2018	0.27653	0.23098	0	0.55941	2.07376	0	0	0	1.29445	0	2.47416	0.83959	0	0	0.68109	0	0	0	0	0.15535	3.84477	2.94576	6.59105	0	0	0	0 a	0 a	0 a
		3OE6	3.2	Inactive	5.03179	0	0	4.24309	1.02117	0	17.1023	0.43137	0.26507	0	0	1.10385	1.28133	0	0	0	1.81376	0	0	1.07564	0.83285	0	1.21086	0	0	0	0	0.64338	3.89813	4.41638	6.62823	0	0	0	0	0	0
		3OE8	3.1	Inactive	7.00616	0	0	3.944 b	0.94547	0	14.9167	0.84251	0.26359	0	0	1.36516	2.51217	0	0	0 b	1.45925	0	1.127 b	0.647 b	1.670 b	0 b	0.86764	0	0	0	0 b	1.15989	3.21857	3.64802	6.07905	0	0 b	0	0 a	0 a	0 ab
		3OE9	3.1	Inactive	8.16187	0	0	3.91857	0.08871	0	12.3644	1.21505	0	0	0	1.27958	3.6838	0	0	0	1.47596	0	4.49549	0.07927	1.72253	0	0.93172	0	0	0	0	0.35383	4.61377	4.54072	3.64279	0	0	0	0 a	0 a	0 a
		4RWS	3.1	Inactive	6.45892	0	0	3.5972	0.32634	0	10.6104	0.04549	0	0.23092	0	1.07622	2.77946	0	0	0	1.38576	0	3.49164	0.50499	1.21748	0	0.32911	0	0	0	0	0.39498	3.88629	3.22428	3.44376	0	0	0	0 a	0 a	0 a
24	DRD2_HUMAN (D2R)	6CM4	2.87	Inactive	2.81068	0	0	4.77411	1.82059	0	4.4043	0.12983	1.33048	0.46476	0 c	0.52434	0.818 c	0	0	0.14969	0.612 c	0	0.58114	2.06205	0.85576	0	0.26904	0 c	0	0	0 c	3.36652	4.17005	6.3867	0.23611	0.02138	0	0	5.37474	0	2.871 a
25	DRD3_HUMAN (D3R)	3PBL	2.9	Inactive	4.144	0	0	3.77435	1.31203	0	4.89332	0.25944	0.68737	1.40921	0	0.77002	0.86322	0	0	0.46434	1.50272	0	4.89319	1.67931	1.00804	0	0.83	0	0	0	0	2.20551	8.69156	4.34876	1.33361	0.20177	0	0	3.40263	0	4.348 b
26	DRD4_HUMAN (D4R)	5WIU	2	Inactive	1.8828	0	0.43122	4.48587	1.34646	0	5.31008	0	0.34206	0.05576	0	0.62266	0.1594	0	0	0.34672	0.95659	0	5.43864	2.31266	0.14415	0	1.07628	0	0.43122	0	0	2.20591	7.95067	4.55192	1.61144	0.08377	0	0	3.53968	0.11946	4.646 a
		5WIV	2.1	Inactive	1.8574	0	0.40212	4.29136	1.03776	0	5.11012	0	0.31318	0.36948	0	0.66569	0.22002	0	0	0.29841	0.84369	0	5.91697	2.3194	0.128	0	1.92611	0	0.40212	0	0	1.65667	7.34143	4.34336	1.80428	0.07881	0	0	5.55527	0.15152	4.86921
27	EDNRB_HUMAN (ETBR)	5X93	2.2	Inactive	2.666	0	0	4.06447	1.24656	0	0.94736	0	1.78312	0.50532	0	0.99178	0	0	0	0.44343	0.52113	0	0	0.06214	1.15309	0	2.55892	0	0	0	0	2.35076	4.85704	3.7519	1.33233	0.4075	0	0	4.95786	0.07208	9.48565
		5XPR	3.6	Inactive	4.29123	0	1.92118	4.3784	0.845 b	0 b	0.921 b	2.594 b	3.82889	3.563 b	0 b	2.840 b	1.007 b	0 b	0 b	0.008 b	0.140 b	0 b	0 b	0 b	0.305 b	0 b	2.136 b	1.921 b	0 b	0 b	0 b	1.931 b	11.661 b	2.864 b	3.3416	2.968 b	0 b	0 b	4.333 b	0.042 b	8.060 a
		5GLI	2.5	Inactive	1.38998	0	0	4.08836	0.84901	0	0.28416	0.6655	1.43157	0.66921	0	0.59869	0	0	0	0.42471	0	0	0	0.09639	0.79129	0	2.3466	0	0	0	0	2.4349	3.10138	2.82751	1.04593	0.26365	0	0	3.27013	0	7.05481
		5GLH	2.8	Intermediate	0.82994	0	0.03881	4.10626	0.233 b	0	1.013 b	1.25922	1.39344	5.20269	0	0.575 b	0.10545	0	0 b	0.633 b	0.102 b	0 b	2.92716	0.69491	0.04793	0 b	3.54966	0.03881	0	0 b	0	1.216 b	4.88722	3.28174	1.74204	2.08325	0 b	0 b	6.058 b	0.413 b	11.618 b
28	FFAR1_HUMAN (GPR40)	5TZR	2.2	Intermediate	3.31948	3.45985	0	3.27037	0	0	0	2.54929	0	5.89678	0	0	1.6024	1.3085	0.2255	0.30069	0.9525	1.92585	0 c	0	0.76458	0	3.2524	0	0	0 c	0	0	0.54694	0.1511	0.77589	1.38122	0	0.14582	0	3.6597	0
		5TZY	3.2	Intermediate	6.19409	1.42863	0	1.99669	0.04547	0	0.0844	2.88788	0	5.22708	0	0	1.65314	0.95613	0	0	1.02783	0.4725	0 c	0	3.51312	0	4.41721	0	0	0 c	0	0	1.24493	0.14336	0.68667	2.93612	0	0	0	0	0
		4PHU	2.3	Intermediate	3.33875	3.75398	0	3.46216	0	0	0	2.06277	0	5.65087	0	0	1.40625	1.33517	0.29107	0.4362	0.9352	2.12774	0 c	0	0.9973	0	3.65415	0	0	0 c	0	0	0.52476	0.02594	0.80374	1.29321	0	0.1314	0	0	0
		5KW2	2.76	Intermediate	4.32135	3.37899	0	0.85585	0	0	1.48597	0.76035	0	3.95137	0	0	1.33443	2.78482	0	0	1.03565	0.59417	0 c	0	1.95127	0	4.15358	0	0	0 c	0	0	0.55812	0	0	1.66509	0	0.20546	0	0	0
29	HRH1_HUMAN (H1R)	3RZE	3.1	Inactive	3.26222	0	1.71208	3.43739	2.56477	0	3.86965	0.889 b	1.753 b	1.420 b	0	0.81304	0.55149	0	0	2.772 b	0.87282	0	0.370 b	0 b	1.025 b	0 b	1.03871	0	1.71208	0	0	0.52885	4.16941	6.723 b	0.296 b	4.107 b	0	0	2.375 b	1.106 b	5.277 b
30	LPAR1_HUMAN (LPA1)	4Z34	3	Inactive	4.07735	0	2.70047	3.91022	0.20186	0	3.27977	0.12408	0.86177	2.65347	0	0.47592	2.37984	0	0	0.10527	1.19362	0	0	0.77931	0.02797	0	1.5633	2.70047	0	0	0	2.08156	7.02804	6.4154	0.98315	0.75125	0	0	0.30331	0	3.26684
		4Z35	2.9	Inactive	4.06104	0	2.67826	3.97804	0.18773	0	3.29816	0.11477	0.83454	2.6185	0	0.46746	2.32843	0	0	0.1029	1.23752	0	0	1.13929	0.02763	0	1.72241	2.67826	0	0	0	2.15843	6.8044	6.34613	0.88293	0.8247	0	0	0.27256	0	2.22533
		4Z36	2.9	Inactive	4.07165	0	2.67072	3.98573	0.1716	0	3.61847	0.11468	0.85015	2.63173	0	0.47717	2.31326	0	0	0.11645	1.24157	0	0	1.10736	0.03965	0	1.72483	2.67072	0	0	0	2.2502	7.26347	6.03762	0.10664	0.73153	0	0	1.20345	0	2.15903
31	Q08BG4_DANRE (LPA6)	5XSZ	3.2	Intermediate	2.59436	1.28834	6.80085	1.45693	0.07813	0	7.65589	0.36301	0.93956	3.58915	6.35015	2.59436	0	1.2834	0	0	0	0.00494	1.17967	1.94727	0	0	4.65732	4.155 b	0.2058	0.36876	0.422 b	0	2.021 b	0 b	1.17162	5.95125	0	0	0	0	0
32	ACM1_HUMAN (M1R)	5CXV	2.7	Inactive	5.10162	0	0.8959	1.05782	1.67052	0	7.09194	1.13	0.06234	4.11733	1.01901	0.45689	1.54088	0	0	0	0.83185	0	0	0	2.272	0	1.06217	0.8959	0	0	0	4.11442	7.27778	2.26017	3.92275	0.61435	0.26268	0	0.33989	1.70489	1.82167
33	ACM3_RAT (M3R)	4DAJ	3.4	Inactive	1.76407	0	0.94312	1.54903	1.790 b	0 b	11.720 b	0.0682	0.13772	4.19159	1.91857	1.02238	0.075 b	0	0 b	0.82748	0.54066	0 b	1.0408	0	0.12651	0 b	2.61784	0.92597	0.017 b	0	0 b	3.77804	8.66893	4.50078	3.11174	2.68174	0 b	0 b	0.875 b	0.752 b	2.374 b
		4U14	3.6	Inactive	4.02682	0	0.66197	2.3105	2.42419	0	12.5168	1.20322	0.28783	3.77669	1.61751	0.3002	0	0	0	0.18294	0.77738	0	0	0	2.94924	0	3.44217	0.66197	0	0	0	1.60679	7.70902	5.76249	6.32082	3.38619	0 a	0	1.43169	0	2.59341
		4U15	2.8	Inactive	4.12051	0	0.83313	2.89805	2.49688	0	9.60878	0.1547	0.24073	1.17451	1.85794	0.83703	0	0	0	0.49724	0.5731	0	0.19403	0	2.71038	0	5.63831	0.83313	0	0	0	0.82461	7.921	2.70226	1.67804	2.6045	0 a	0	4.1868	0.17201	6.16869
		4U16	3.7	Inactive	2.64793	0	1.02271	2.70323	0 b	0 b	8.72435	0.15837	0.24499	1.11703	1.05959	0.89803	0.19731	0	0	0.24028	0.35594	0	0	0	1.19665	0	4.478 b	1.02271	0	0	0 b	2.13447	6.24004	3.02833	1.77639	1.578	0 b	0	0	0	0
34	ACM4_HUMAN (M4R)	5DSG	2.6	Inactive	4.53399	0	0.62802	2.70987	2.58995	0	7.07024	0.64725	0.02827	4.15264	1.15726	0.62353	0	0	0	0.12919	2.25692	0	1.12354	1.73378	1.65354	0	3.49152	0.62802	0	0	0	7.21538	8.89763	4.05087	1.17959	3.94906	0 b	0	1.75817	0	2.602 b
35	NTR1_RAT (NTSR1)	3ZEV	3	Intermediate	4.58661	0	5.59987	3.93866	0.56933	0	3.58588	0	0.187 b	0.58689	0 b	0.34351	0.7411	0	0	0 c	2.66651	0	0 c	0 c	0.835 c	0 c	0	5.00282	0.597 b	0	0	1.57404	6.318 b	0	2.455 b	0	0 b	0.05827	4.417 b	3.617 b	9.521 b
		4BUO	2.8	Intermediate	4.18014	0	5.02022	3.94321	0.46526	0	5.27953	0	0	0.73766	0 b	0.386	0.60691	0	0	0 c	2.02244	0	0 c	0.046 c	1.165 c	0 c	0	4.6507	0.36952	0	0	2.24204	7.61698	0.00743	2.56911	0	0 b	0	4.58856	2.47037	10.7432
		4BV0	3.1	Intermediate	2.99899	0	5.1636	3.32097	0.15963	0	2.7547	0	0.05409	5.02034	0	0 c	0.49175	0	0	0 c	1.21916	0	0 c	0 c	1.288 c	0 c	0	5.049	0.1146	0 c	0	0.529 c	8.33334	0	0.92911	0	0 b	0.0696	5.67192	4.434 b	7.755 b
		4BWB	3.6	Intermediate	1.57943	0	4.38211	3.11816	0.05954	0	2.91406	0 b	0.013 b	3.81676	0 b	0.13872	0.464 b	0	0	0 b	0.131 b	0 b	0 bc	0 bc	0.845 c	0 c	0	4.382 b	0 c	0	0	0.74853	9.977 b	0.51888	2.416 b	0	0 b	0	1.05075	0.27171	8.24496
		4GRV	2.8	Intermediate	0	3.38174	5.72921	1.49173	0	0.42309	2.88835	0.83798	1.73876	5.33041	0	0	0	0.00148	1.55141	0	0 c	1.82885	0 c	0	0 c	0	4.14069	2.54674	1.68182	1.36901	0.132 c	0	2.46559	0	5.84225	0.79397	0	0.77852	0	0	0 a
		4XEE	2.9	Intermediate	0	6.66141	3.92285	1.54722	0	2.68419	1.55783	1.54827	5.32009	3.6334	1.71674	0	0	0.41456	3.60459	0.23257	0	2.4401	0.02874	0	0	0.20216	2.0754	0.61817	1.97164	0.78437	0.54867	0	6.03477	0	3.52333	0	0	0	0	2.32863	0
		4XES	2.6	Intermediate	0.0225	4.38493	3.09903	1.59544	0	0.5084	1.34124	1.46777	2.95241	3.596 b	1.66108	0	0	0.012 b	2.53259	1.51507	0	1.31134	0 c	0	0.0225	0.52871	2.27837	0.42869	1.19144	0.95387	0.52503	0 b	5.92465	0	2.75127	1.343 b	0	0	0	6.79001	0
		5T04	3.3	Intermediate	0.02604	9.01732	6.00287	2.53123	0	4.37338	2.35326	2.43127	3.22876	3.29224	0	0.02604	0	0.29641	2.87747	0.328 b	0	1.92008	0 b	0 b	0 b	3.923 b	4.06281	1.8504	1.87861	0.90086	1.373	0	0.67916	0	4.35505	0.26326	0	0.52096	0 a	0 a	0 a
36	OX1R_HUMAN (OX1R)	4ZJ8	2.8	Inactive	4.03774	0	0.21952	3.61531	0.87626	0	5.2648	0.75731	0	1.61078	0	0.6042	0.20463	0	0	0.16879	1.95588	0	2.95987	2.26872	1.27303	0	2.87555	0.19795	0.02157	0	0	1.16528	6.90323	4.62693	0.4456	2.38379	0	0	1.77284	0	3.26579
		4ZJC	2.8	Inactive	3.52007	0	0.17518	2.71944	0.86963	0	4.74023	0.78088	0	1.60764	0	0.3926	0.22011	0	0	0.04695	1.65729	0	2.72005	2.22809	1.25007	0	2.79056	0.16009	0.01509	0	0	0.84946	6.79563	4.31164	1.11672	1.84534	0	0	1.50872	0	5.13123
37	OX2R_HUMAN (OX2R)	4S0V	2.5	Inactive	3.18624	0	0.21751	2.96717	0.99127	0	4.04471	0.30843	0.38278	1.26943	0	0.25671	0.20407	0	0	0.07409	1.65897	0	3.59416	1.44016	1.06649	0	1.54769	0.09125	0.12626	0	0	1.52824	6.09142	4.03737	0.4928	1.18372	0	0.11921	2.46112	0	8.16895
		5WS3	2.3	Inactive	3.3517	0	0.07932	3.28322	0.78698	0	3.52643	0.04002	0.57365	0.65822	0	0.56008	0	0	0	0	1.50957	0	5.0413	1.8732	1.28205	0	1.43119	0	0.07932	0	0	0.45235	7.22606	2.63195	0.82794	1.91454	0	0.03182	2.61373	0.01157	8.67706
		5WQC	1.96	Inactive	3.33706	0	0.11058	3.81994	0.94225	0	4.82437	0.12019	0.51221	0.7974	0	0.5645	0.02437	0	0	0	1.62162	0	4.72875	1.6907	1.12657	0	1.06278	0	0.11058	0	0	0.62816	7.21325	1.91528	1.37332	1.61887	0	0	2.82128	0.05535	7.94178
38	P2RY1_HUMAN (P2Y1R)	4XNV	2.2	Inactive	3.14154	0.01854	0	2.44499	1.30689	0.01528	8.4987	0.31135	0.76594	4.004 c	1.94049	0	0.52969	0.019 c	0	0	1.81789	0	0	0	0.79396	0	1.73664	0	0	0	0	0 c	4.25117	2.41534	7.87735	0.223 c	0	0.11522	0.52037	2.1054	0 a
		4XNW	2.7	Inactive	2.59085	0	0	1.89454	1.40655	0	3.77861	0.18235	0.3628	3.790 c	1.99051	0	0.50175	0 c	0	0	1.3356	0	0	0	0.7535	0	1.67532	0	0	0	0	0 c	3.81084	0.28524	5.05806	2.083 c	0	0.24461	0	0	0 a
39	P2Y12_HUMAN (P2Y12R)	4NTJ	2.6	Inactive	0.34748	1.1694	0	2.7232	1.05516	0	3.74679	1.15378	0.31155	5.582 c	6.827 b	0	0.34748	1.169 c	0	0	0 a	0	3.09668	2.43618	0 a	0	2.15982	0	0	0	0 a	0 c	0.01952	0.6759	5.94506	6.303 c	0	0	10.0328	2.35533	9.12654
		4PXZ	2.5	Intermediate	4.82104	2.88721	0	1.91518	0 a	0.57203	0.741 a	0.55595	0.86516	6.005 c	3.62119	0	1.82515	2.887 c	0 a	0.27043	0	0 a	3.32714	3.46632	2.99589	0 a	2.10648	0	0	0	0	0 c	2.5745	0.95233	5.28264	6.030 c	0	0 a	0 a	0 a	0 a
		4PY0	3.1	Intermediate	4.3328	1.635	0	1.83625	0 ab	1.93258	1.262 ab	0.86022	0.72357	2.540 c	4.905 b	0	2.93953	1.635 c	0 ab	0.01786	0	0 ab	2.04912	2.73809	1.39327	0 ab	1.76579	0	0	0	0	0 c	2.32785	0.15414	4.72973	4.900 c	0 b	0 ab	0 ab	1.270 a	0 a
40	PAR1_HUMAN (PAR1)	3VW7	2.2	Inactive	2.83738	0.07641	0	1.66457	1.26129	0	2.5942	0.31464	0.39963	5.36956	1.6964	0	1.66287	0.07641	0	0.18174	0.55177	0	1.76466	0.22223	0.62274	0	3.33566	0	0	0	0	0	4.35032	0.75953	2.55787	0	0	0.25309	0	2.0881	0 a
41	PAR2_HUMAN (PAR2)	5NDD	2.8	Inactive	0.30072	0	0	1.92917	1.49624	0	4.48763	0	0.19616	5.9039	3.5461	0 c	0.301 c	0 c	0 c	0.19174	0	0	0	0 c	0	0	1.908 c	0	0	0	0	0	7.03173	1.98981	0.30176	1.06777	0	0.25527	5.98906	2.80016	7.77708
		5NDZ	3.6	Inactive	1.00623	0	0	1.86098	1.48369	0	5.25057	0	0.13764	6.03233	5.12032	0 c	0.870 c	0 c	0 c	0.59522	0	0	0	0 c	0.13605	0	1.814 c	0	0	0	0 b	0	4.77301	1.86249	0.54037	1.16643	0	0.16648	6.1094	3.01411	7.08696
42	S1PR1_HUMAN (S1P1)	3V2W	3.4	Inactive	3.28718	0	4.03531	4.6405	0.95221	0	2.67301	0.61429	1.89926	2.03881	0	0.31959	1.44335	0	0	0	1.25948	0	0 a	1.90525	0.26476	0	0.43766	2.82986	1.20545	0	0	2.6469	6.20196	5.72858	2.89806	0.11134	0 b	0.7243	2.36292	0	3.172 a
		3V2Y	2.8	Inactive	1.48688	0	2.78212	5.96571	1.47256	0	2.12732	0	1.05584	2.72265	0	0.07377	0.25261	0	0	0	1.1605	0	6.19241	1.98318	0	0	0.49727	2.09935	0.68277	0	0	1.93571	7.47287	5.17479	1.10687	0.33777	0	0.79943	3.51414	0	2.318 a
43	US28_HCMVA (US28)	4XT1	2.9	Intermediate	0.76679	7.47205	6.63025	2.84316	0	2.00767	2.95882	1.22114	2.47759	3.84663	0.43139	0	0	1.63784	2.42975	2.96159	0	2.1411	0	0	0.76679	1.26336	5.61638	3.47375	0.69717	1.10508	1.35425	0	3.25967	2.72597	4.75362	2.32823	5.3821	1.48015	0	7.09186	0
		5WB1	3.51	Intermediate	0.30226	7.77528	5.59967	2.17082	0	2.09019	3.54624	1.10852	1.62009	3.89225	0.71344	0	0	1.23955	3.27712	3.027 b	0	2.20102	0 b	0 b	0.302 b	1.058 b	4.23332	3.90552	0.48509	1.13083	0.07823	0	2.57096	1.3883	6.08238	3.22086	6.20159	1.14529	0	5.51872	0
		5WB2	3.5	Intermediate	0.7009	7.06074	6.64854	3.26507	0 b	2.62156	3.898 b	0.570 b	1.60201	3.77058	0.043 b	0 b	0 b	1.304 b	2.330 b	3.048 b	0 b	2.255 b	0 b	0 b	0.701 b	1.172 b	4.451 b	3.046 b	0.66369	1.66113	1.278 b	0	2.709 b	2.734 b	4.708 b	2.069 b	8.18239	1.280 b	0 b	5.718 b	0 b
44	NPY1R_HUMAN (Y1R)	5ZBH	3	Inactive	6.32755	0	1.43606	3.86482	1.66271	0	4.54512	0.55401	0.980 b	0.90309	0	0.54482	2.39376	0	0	0.30353	1.15099	0	0	0.91601	2.23798	0	0.22545	0.00501	1.43105	0	0	0.69804	4.12047	0.01909	4.18517	0	0.079	0	3.831 b	1.691 b	3.83607
		5ZBQ	2.7	Inactive	6.31543	0	1.28693	4.18623	2.12398	0	4.34607	1.19021	1.768 b	1.25765	0	0.70689	2.38479	0	0	0.26468	1.43494	0	2.1104	1.2506	1.78881	0	1.98206	0	1.28693	0	0	0.62981	4.99647	0.41643	2.37967	0	0	0	0	1.24884	0
45	PTAFR_HUMAN (PTFR)	5ZKP	2.81	Inactive	4.11836	1.14758	0	1.7207	0.10698	0.23763	0	0	0	0.333 c	2.31996	0	3.0224	1.148 c	0	0.07264	0.88095	0	0	2.23924	0.21501	0	7.026 c	0	0	0	0	0 c	1.80399	0	1.0011	1.244 c	0	0	0	0	0
		5ZKQ	2.9	Inactive	3.19503	0	0	0.97361	7.356 b	0	7.460 b	0.33309	0.6201	6.890 c	2.86672	0	1.26493	0 c	0 b	0	0.25563	0 b	2.72088	1.185 b	1.67447	0 b	5.590 c	0	0	0	0	0 c	2.94043	0.28438	3.78324	2.919 c	0	0 b	0 b	0	0
