# Supplementary material for: Common activation mechanism of class A GPCRs
Source: eLife. 2019 Dec 19;8:e50279. doi: 10.7554/eLife.50279 (PMC6954041; doi:10.7554/eLife.50279)
Supplement: Figure 7—source data 1. [file elife-50279-fig7-data1.xlsx]

## Sheet: Sheet1
Figure 7-Source data 1. Constitutively activating/inactivating mutations for the 14 hub residues in the common activation pathway.
Receptor	Redicue (GPCRdb numbering)	Mutation	Functional outcome	Source	Pubmed ID	Descriptions in the literature
5HT1A_HUMAN	2x50	D82N	Inactivating	PubMed text miming	1426261	The amino acid substitutions in the transmembrane regions, Asp82-->Asn82, Asp116-->Asn116, and Ser198-->Ala198 all resulted in a decrease in affinity for 5-HT by 60-100-fold, without affecting the affinity for the antagonist, pindolol. The mutant receptors all required a 30-100-fold higher concentration of 5-HT to induce comparable GTPase activity
	7x49	N396A	Inactivating	PubMed text miming	8474430	Did not bind the 5-HT1A agonist 8-hydroxy-2-(di-n-[3H]propylamino)tetralin
	7x49	N396F	Inactivating	PubMed text miming	8474430	Did not bind the 5-HT1A agonist 8-hydroxy-2-(di-n-[3H]propylamino)tetralin
	7x49	N396V	Inactivating	PubMed text miming	8474430	Did not bind the 5-HT1A agonist 8-hydroxy-2-(di-n-[3H]propylamino)tetralin
5HT2A_HUMAN	2x50	D120N	Inactivating	PubMed text miming	7622478	Whereas an Asp-->Asn mutation in helix 2 eliminated coupling
	2x50	D120A	Inactivating	PubMed text miming	7622478	eliminated the PI signalling
	3x50	R173E	Inactivating	PubMed text miming	11801601	Receptor activation, as measured by PI hydrolysis, was most severely inhibited by the R173(3.50)E mutation (Table III), which showed a 32-fold decrease in agonist potency.
	6x37	L325A	Inactivating	PubMed text miming	11801601	Four classes of mutations were discovered: 3) mutations that reduced the efficacy of 5-HT-stimulated PI hydrolysis (L325(6.37)A);
	6x40	W328A	Constitutively activating	PubMed text miming	11801601	Substantial and graded gain of function phenotypes characterized by increased potencies for serotonin (33-fold) and decreased potencies for ritanserin (9.5-fold).
	7x49	N376A	Inactivating	PubMed text miming	7622478	Not affect binding, but with effect with G-coupling
	7x49	N376D	Inactivating	PubMed text miming	7622478	Not affect binding, but with effect with G-coupling
5HT2B_HUMAN	2x50	D100N	Inactivating	PubMed text miming	11859080	Mutations of either Asp2.50(100) or Asn7.49(376) did not affect the receptor expression. However, the 5-HT affinity was decreased by 12-fold, and the maximal 5-HT-induced IP3 production was reduced by 2.5-fold.
	6x48	W337A	Inactivating	PubMed text miming	11859080	Decreased the binding affinity of 5-HT by 11-fold
	7x49	N376D	Inactivating	PubMed text miming	11859080	Reduced the maximal 5-HT-induced IP3 production by 2.5-fold
AA2AR_HUMAN (A2AR)	2x50	D52A	Inactivating	GPCRdb	25473121	Mutations D52A2.50 and N284A7.49 completely abolished receptor signaling
	2x50	D52N	Inactivating	PubMed text miming	29395784	A2AAR D52N evidenced no cAMP accumulation upon UK432097 stimulation, similar to what was observed with A2AAR D52A in an earlier report (Massink et al., 2015)
	3x40	I92A	Inactivating	in this research	in this research	greatly reduced cAMP production
	3x40	I92N	Constitutively activating	in this research	in this research	constitutive activation of the receptor
	3x43	L95A	Constitutively activating	in this research	in this research	constitutive activation of the receptor
	3x43	L95R	Constitutively activating	in this research	in this research	constitutive activation of the receptor
	3x43	L95F	Inactivating	in this research	in this research	greatly reduced cAMP production
	3x46	I98A	Inactivating	in this research	in this research	greatly reduced cAMP production
	3x49	D101N	Constitutively activating	in this research	in this research	constitutive activation of the receptor
	3x50	R102L	Inactivating	in this research	in this research	greatly reduced cAMP production
	6x37	L235A	Inactivating	in this research	in this research	greatly reduced cAMP production
	6x40	I238Y	Constitutively activating	in this research	in this research	constitutive activation of the receptor
	6x41	V239A	Inactivating	GPCRdb	23489072	lower sensitivity to NECA than A54L and has no detectable constitutive activity
	6x41	V239Q	Inactivating	in this research	in this research	greatly reduced cAMP production
	6x44	F242A	Constitutively activating	in this research	in this research	constitutive activation of the receptor
	6x44	F242R	Inactivating	in this research	in this research	greatly reduced cAMP production
	6x48	W246A	Inactivating	GPCRdb	25473121	decreased agonist-stimulated receptor signaling
	7x45	N280R	Inactivating	in this research	in this research	greatly reduced cAMP production
	7x49	N284A	Inactivating	GPCRdb	25473121	completely abolished receptor signaling
	7x49	N284K	Inactivating	in this research	in this research	greatly reduced cAMP production
	7x53	Y288A	Inactivating	in this research	in this research	greatly reduced cAMP production
AA2BR_HUMAN	3x50	R103A	Inactivating	GPCRdb	24464644	abolished many humanized G protein pathways
	6x37	L236A	Inactivating	GPCRdb	24464644	decreased receptor activation in all G protein pathways, although to a different extent
	6x48	W247A	Inactivating	GPCRdb	23286920	NECA(EC50 of 10400 nM, 125-fold difference with respect to that of the wt)
	7x45	N282D	Inactivating	GPCRdb	23286920	The N282D mutant (Table 5) showed a dramatic decrease in potency (EC50 of 15500 nM, 580-fold) and affinity (Ki of >100000, 16-fold) for NECA
	7x49	N286A	Inactivating	PubMed text miming	http://hdl.handle.net/1887/13396	reduced the ability of the agonists to activate the receptor
	7x49	N286Q	Inactivating	PubMed text miming	http://hdl.handle.net/1887/13396	reduced the ability of the agonists to activate the receptor
AA3R_HUMAN	2x50	D58N	Inactivating	PubMed text miming	12695530	The N30A(1.50) and D58N(2.50) mutations abolished the allosteric effects of DU124183 and VUF5455, but not HMA
	3x50	R108A	Constitutively activating	GPCRdb	11396942	constitutively active in both phospholipase C (PLC) and adenylyl cyclase (AC) assays
	3x50	R108K	Constitutively activating	GPCRdb	11396942	constitutively active in both phospholipase C (PLC) and adenylyl cyclase (AC) assays
	6x48	W243A	Inactivating	GPCRdb	11891221	bound agonist strongly but was functionally inactive.
	6x48	W243F	Inactivating	PubMed text miming	11891221	functionally inactive; Hence, theGTP analogue induced a 3-fold affinity decrease of Cl-IBMECA in WT receptors, whereas in the W243F mutant receptor only a 1.4-fold decrease of affinity was observed, onsistent with the impaired ability of agonist to activate PLC through this mutant receptor.
	7x53	Y282F	Inactivating	GPCRdb	11396942	The potency of this agonist and the maximal IP levels achieved were greatly decreased (.10- fold) in the C88F, Y109F and Y282F mutant ARs
ACM1_HUMAN	2x50	D71N	Inactivating	PubMed text miming	1618842	a D71N point mutation that prevented receptor activation also abolished carbachol-induced receptor internalization
	3x40	L113A	Constitutively activating	PubMed text miming	10066794	signaling efficacy was also increased.
	3x43	L116A	Constitutively activating	PubMed text miming	10066794	constitutive activation of the receptor
	3x46	I119A(Rat)	Inactivating	PubMed text miming	10066794	the basal activity of the I119A mutant is decreased
	6x44	F374H	Inactivating	PubMed text miming	10681552	reduced ACh affinity by 17-fold,
	6x48	W378A	Inactivating	PubMed text miming	17848601	Reduction in ACh signaling efficacy by 60-fold, abolished agonist-independent basal signaling
	7x49	N414A	Inactivating	PubMed text miming	11441014	completely failed to elicit a PhI response to ACh stimulation
	7x49	N414H	Inactivating	PubMed text miming	10681552	zero ACh-stimulated PI signaling efficacy
	7x53	Y418H	Inactivating	PubMed text miming	10681552	decreased ACh-stimulated PI signaling efficacy by 35-fold
ACM2_HUMAN	3x50	D120N	Inactivating	PubMed text miming	28733581	decreased the amplitude difference between the Ip and the Is of pilocarpine-evoked GIRK currents at −100 mV
	3x49	D121N	Inactivating	PubMed text miming	28733581	decreased the amplitude difference between the Ip and the Is of pilocarpine-evoked GIRK currents at −100 mV
	6x37	I389L	Inactivating	PubMed text miming	9063897	greatly increased the EC50 of PI hydrolysis
ACM5_HUMAN	6x40	I447S	Constitutively activating	PubMed text miming	9705286	cause constitutive activity
	6x44	F451A	Constitutively activating	PubMed text miming	9705286	Constitutive activity and maximum response increased
	6x44	F451L	Constitutively activating	PubMed text miming	9705286	Constitutive activity and maximum response increased
	6x44	F451N	Constitutively activating	PubMed text miming	9705286	Constitutive activity and maximum response increased
	6x44	F451T	Constitutively activating	PubMed text miming	9705286	Constitutive activity and maximum response increased
	6x44	F451V	Constitutively activating	PubMed text miming	9705286	Constitutive activity and maximum response increased
ADA1B_HUMAN	6x40	V299F	Constitutively activating	PubMed text miming	11961120	The potency of epinephrine was also significantly increased at the V299F mutant, but only by 5-fold (Table 1)
	6x44	F303A	Inactivating	PubMed text miming	11961120	The F303A mutant was functionally similar to the F303G
	6x44	F303G	Inactivating	PubMed text miming	11961120	displayed a 50-fold increase in affinity for epinephrine and an almost complete loss of receptor mediated signaling
	6x44	F303L	Constitutively activating	PubMed text miming	11961120	increased the constitutive as well as agonist-induced activity of the receptor
	7x53	Y348A	Inactivating	PubMed text miming	9271354	completely uncoupled the receptors from stimulation of phosphoinositide hydrolysis and mobilization of intracellular Ca21
ADRB2_HUMAN	2x50	D79N	Inactivating	PubMed text miming	15102946	dramatically decreased the potency and maximal activity of epinephrine to stimulate cAMP accumulation by 200- and 5-fold, respectively
	3x43	L124A	Constitutively activating	PubMed text miming	10935550	elevated basal cAMP production relative to the wild-type receptor
	3x43	L124K	Constitutively activating	PubMed text miming	10935550	elevated basal cAMP production relative to the wild-type receptor
	3x43	L124R	Constitutively activating	PubMed text miming	10935550	exhibited a 9-fold elevation of basal cAMP production relative to cells expressing the wild-type receptor
	3x49	D130A	Constitutively activating	PubMed text miming	10385699	displayed evidence of constitutive receptor activation
	3x49	D130N	Constitutively activating	PubMed text miming	10385699	displayed evidence of constitutive receptor activation
	6x44	F282A	Inactivating	PubMed text miming	23135271	the agonist-induced signaling was almost eliminated in the AlaVI:09 mutant form of the B2AR without any effect on cell surface expression
	6x48	W286A	Inactivating	PubMed text miming	19920139	greatlt reduced the Emax in cAMP signaling
	7x49	N322A	Inactivating	PubMed text miming	7492540	complete uncoupling of the receptor, loss of high-affinity agonist binding, and abolition of receptor sequestration, down-regulation, and phosphorylation
	7x53	Y326A	Inactivating	PubMed text miming	7507928	completely abolishes agonist-mediated receptor sequestration without affecting the ability of the receptor to activate maximally adenylyl cyclase, to undergo rapid desensitization, and to down-regulate in response to agonist.
AGTR1_HUMAN	2x50	D74N	Inactivating	PubMed text miming	12826267	Thus, we introduced a variety of mutations-AT(1)[D74N], AT(1)[Y292F], AT(1)[N295S], and AT(1)[AT(2) TM7], which is composed of a chimeric substitution of the AT(1) seventh transmembrane domain with its AT(2) counterpart. These mutations that strongly diminished the receptor's ability to activate PLC-beta had little to no effect on its ability to activate p42/44(MAPK)
	3x50	R126H	Inactivating	PubMed text miming	12356298	receptors that are uncoupled from G proteins, associated with â-arrestins, and found localized in endocytic vesicles rather than at the plasma membrane in the absence of agonists
	6x40	I245T	Constitutively activating	PubMed text miming	10852946	greatly increased sensitivity to CGP42112A
	7x53	Y302A	Inactivating	PubMed text miming	8569717	Interestingly, however, the transmembrane signaling was severely impaired in transfected cells expressing mutant receptors.
	7x53	Y302F	Inactivating	PubMed text miming	8569717	Interestingly, however, the transmembrane signaling was severely impaired in transfected cells expressing mutant receptors.
BKRB2_HUMAN	2x50	D76N	Inactivating	PubMed text miming	9882702	The ability of BK to stimulate IP production in cells expressing the mutated D76N receptor was significantly reduced
	6x48	W283F	Constitutively activating	PubMed text miming	11495910	significantly constitutively activated (CAM receptors) as compared with the wild-type receptor
	6x48	W283Q	Constitutively activating	PubMed text miming	11495910	significantly constitutively activated (CAM receptors) as compared with the wild-type receptor
	7x53	Y332A	Inactivating	PubMed text miming	15161928	receptor sequestration of the mutant after stimulation with BK was clearly reduced relative to the wt B2R.
C5AR1_HUMAN	2x50	D82N	Inactivating	PubMed text miming	7957584	hC5aR containing the substitution Asp82 to Asn82 can bind hC5a but are incapable of correctly transducing the binding signal across the plasma membrane to intracellular effector molecules.
	3x40	I124N	Constitutively activating	PubMed text miming	10336477	Receptors containing individual substitutions of either I124N or L127Q show weak constitutive activity (Table II).
	3x43	L127Q	Constitutively activating	PubMed text miming	10336477	Receptors containing individual substitutions of either I124N or L127Q show weak constitutive activity (Table II).
	6x44	F251A	Constitutively activating	PubMed text miming	10336477	However, a point mutation in helix VI, F251A, did generate a constitutively active receptor (Table II).
CCR3_HUMAN	3x49	D130A	Inactivating	PubMed text miming	11920572	chemotaxis was abolished for the D130A, D130N and R131L mutants, suggesting that there is an absolute requirement for charge in these two positions
	3x49	D130N	Inactivating	PubMed text miming	11920572	chemotaxis was abolished for the D130A, D130N and R131L mutants, suggesting that there is an absolute requirement for charge in these two positions
	3x50	R131L	Inactivating	PubMed text miming	11920572	chemotaxis was abolished for the D130A, D130N and R131L mutants, suggesting that there is an absolute requirement for charge in these two positions
CCR5_HUMAN	3x40	I116A	Constitutively activating	PubMed text miming	24328926	constitutively active
	3x50	R126N	Inactivating	PubMed text miming	9054370	incapable of efficiently mobilizing calcium in response to high levels of chemokine but are expressed well and bind MIP-1b with affinities close to that of wild-type CCR5
	7x53	Y297A	Inactivating	PubMed text miming	9303305	functionally impaired in its ability to inhibit forskolin-stimulated cAMP formation
CCR8_HUMAN	6x48	W251A	Constitutively activating	GPCRdb	17652183	increased the basal activatity which were measured by IP accumulation
	6x48	W251Q	Constitutively activating	GPCRdb	17652183	increased the basal activatity which were measured by IP accumulation
CNR1_HUMAN	2x50	D164N	Inactivating	PubMed text miming	10462549	We found that the D164N receptor binds the CB(1) agonist WIN 55,212-2 with an affinity matching that of the wild-type CB(1) receptor and inhibits Ca(2+) currents and cAMP production with an equivalent potency and efficacy. This mutation, however, blocks coupling of the receptor to the potentiation of inwardly rectifying potassium channel (KIR) currents and prevents internalization of the receptor…
	3x43	L207A	Constitutively activating	PubMed text miming	Murphy, James William, "Mapping amino acid residues critical for ligand binding and activity of the human cannabinoid receptor one, a G-protein coupled receptor" (2002). Doctoral Dissertations. AAI3071213	shifted towards G-protein activation
	3x46	T210A	Inactivating	PubMed text miming	16634642	diminished agonist and enhanced inverse agonist affinity
	3x46	T210I	Constitutively activating	PubMed text miming	16634642	enhanced agonist and diminished inverse agonist affinity relative to the wild type, consistent with a shift toward the active form.
	3x49	D213A	Inactivating	PubMed text miming	28678776	markedly decrease the potency of the agonists
	3x50	R214A	Inactivating	PubMed text miming	25510402	a partial decrease in its ability to activate heterotrimeric Go proteins (w80% of WT CB1R (CB1R-WT)). Moreover, this mutant showed an enhanced basal b-arrestin2 (b-arr2) recruitment
CNR2_HUMAN	2x50	D80E	Inactivating	PubMed text miming	9580609	the maximal inhibition of forskolin-stimulated cAMP accumulation obtained with the D80E mutant was 45% at 1 mM WIN 55,212–2 as compared with 73% inhibition in wild-type cells (fig. 3C) and 35% at 1 mM CP-55,940 as compared with 80% in wild-type cells (fig. 3D).
	2x50	D80N	Inactivating	PubMed text miming	9580609	Similarly, no dose-responsive inhibition of forskolin-stimulated cAMP accumulation was seen in the D80N cell line (fig. 3, C and D). The aspartate to glutamate mutants also showed reduced efficacy in this measure of coupling
	3x49	D130A	Inactivating	PubMed text miming	12663043	abolished ligand binding and abolished constitutive activity of the wild-type CB2 receptor
	3x50	R131A	Inactivating	PubMed text miming	12663043	abolished constitutive activity of the wild-type CB2 receptor
	7x53	Y299A	Inactivating	PubMed text miming	11470278	a complete loss of ligand binding and a severe impairment of cannabinoid-induced inhibition of forskolin-stimulated cAMP accumulation
CXCR1_HUMAN	3x43	L128A	Inactivating	PubMed text miming	22936990	not capable of coupling to G proteins and consequently lost the functional response of the receptors
	3x43	L128R	Inactivating	PubMed text miming	22936990	not capable of coupling to G proteins and consequently lost the functional response of the receptors
	3x49	D134N	Inactivating	PubMed text miming	25834784	The results demonstrate that mutations of D1343.49 at DRY motif of CXCR1 (D134N and D134V) completely abolished the ligand binding and functional response of the receptor.
	3x49	D134V	Inactivating	PubMed text miming	25834784	The results demonstrate that mutations of D1343.49 at DRY motif of CXCR1 (D134N and D134V) completely abolished the ligand binding and functional response of the receptor.
	6x40	V247A	Constitutively activating	PubMed text miming	22936990	constitutive activation of mutant receptors when cotransfected with Gα15
	6x40	V247N	Constitutively activating	PubMed text miming	22936990	constitutive activation of mutant receptors when cotransfected with Gα15
	6x44	F251H	Constitutively activating	PubMed text miming	25834784	constitutively active mutants coupled to G proteins and lead to increase in IP accumulation in the absence of the ligand IL-8
CXCR4_HUMAN	3x50	R134H	Inactivating	PubMed text miming	27543332	reduced CXCL12 calcium flux when compared with the WT receptor
	6x40	L244P	Inactivating	PubMed text miming	27543332	reduced CXCL12 calcium flux when compared with the WT receptor
	6x41	I245T	Inactivating	PubMed text miming	27543332	reduced CXCL12 calcium flux when compared with the WT receptor
	6x44	F248Y	Inactivating	PubMed text miming	27543332	reduced CXCL12 calcium flux when compared with the WT receptor
	6x48	W252R	Inactivating	PubMed text miming	27543332	reduced CXCL12 calcium flux when compared with the WT receptor
	7x53	Y302H	Inactivating	PubMed text miming	27543332	reduced CXCL12 calcium flux when compared with the WT receptor
FSHR_HUMAN	3x43	L460R	Constitutively activating	GPCRdb	10935550	a 5-fold increase in basal cAMP in transfected cells, consistent with a strong constitutive activation of
	3x50	R467A	Inactivating	GPCRdb	12039074	Ligand-stimulated cAMP production was virtually abolished
	3x50	R467H	Inactivating	GPCRdb	12039074	Ligand-stimulated cAMP production was virtually abolished
	6x37	M574I	Constitutively activating	PubMed text miming	17609213	increased the basal cAMP by 2.19-fold
	6x41	I578L	Constitutively activating	PubMed text miming	17609213	increased the basal cAMP by 2.49-fold
GASR_HUMAN	6x48	W346A	Constitutively activating	PubMed text miming	17599907	Mutant W6.48A exhibited a 2.5-fold enhanced activity relative to wild-type CCK2R
GHSR_HUMAN	2x50	D89E	Inactivating	PubMed text miming	26269596	substitution of AspII:10 with Glu totally eliminated both the constitutive signaling and the ghrelin-induced signaling
	3x43	I134T	Constitutively activating	PubMed text miming	17596538	constitutive activity comparable with the WT value
	6x44	F272A	Inactivating	PubMed text miming	23135271	the high constitutive signaling through the Gq-mediated pathway observed in the wild-type ghrelin receptor was totally eliminated, decreased ghrelin-induced signaling to 10% with only a minor effect on agonist potency
	6x44	F272L	Inactivating	PubMed text miming	23135271	induced an Emax around 35% of that observed for wild-type receptor, again with no effect on ghrelin potency
	6x48	W276A	Inactivating	PubMed text miming	19920139	the high constitutive activity of the ghrelin receptor, which in respect to immunoprecipitation signaling normally is 45% of the maximal signaling capacity (35), was totally eliminated by the Ala substitution of Trp-VI:13
GNRHR_HUMAN	2x50	N87A	Inactivating	PubMed text miming	10894158, 10506131	At a level of sensitivity which yielded an intense band for the epitope-tagged wild-type receptor, only a faint signal was visible for the H2 mutants in which Asn2.50(87) was substituted with Asp, Gln, or Ala (Fig. 1).
	2x50	N87D	Inactivating	PubMed text miming	10506131	At a level of sensitivity which yielded an intense band for the epitope-tagged wild-type receptor, only a faint signal was visible for the H2 mutants in which Asn2.50(87) was substituted with Asp, Gln, or Ala (Fig. 1).
	2x50	N87Q	Inactivating	PubMed text miming	10506131	At a level of sensitivity which yielded an intense band for the epitope-tagged wild-type receptor, only a faint signal was visible for the H2 mutants in which Asn2.50(87) was substituted with Asp, Gln, or Ala (Fig. 1).
	3x40	A129D	Inactivating	Disease-associated	10084584	complete loss of function, indicated by the lack of inositol triphosphate (TP3) 3 production
	3x49	D138A	Inactivating	PubMed text miming	10894158	abolished ligand binding and signal transduction
	3x50	R139H	Inactivating	Disease-associated	11397871	completely eliminated detectable GnRH-binding activity and prevented GnRH-induced stimulation of inositol phosphate accumulation in vitro
	6x37	T269M	Inactivating	Disease-associated	22745237, DOI: 10.6092/UNINA/FEDOA/10466	Complete loss of function
	7x49	D318A	Inactivating	PubMed text miming	10506131	the D7.49(318)A construct, which expressed at wild-type levels, exhibited low maximal IP response (12% of wild-type Emax)
	7x49	D318L	Inactivating	PubMed text miming	10506131	It was not possible to calculate coupling efficiency for the D7.49(318)L mutant because of its lack of measurable binding and IP accumulation
	7x49	D318N	Inactivating	PubMed text miming	10506131	greatly reduced the coupling effciency, and the IP max
	7x53	Y322A	Inactivating	PubMed text miming	15967801, 8843414	The Y322A mutant receptor expressed in COS-7 cells had high agonist binding affinity, but its ability to interact with G protein(s) and to activate inositol phosphate production in response to GnRH was abolished
	7x53	Y322C	Inactivating	Disease-associated	22679506	increased GnRH binding affinity but reduced receptor expression at the plasma membrane and impaired G protein-coupling
GP119_HUMAN	2x50	D51E	Inactivating	PubMed text miming	26269596	the effect of the mutation was difficult to interpret as both the constitutive activity and the Emax were reduced to 50% ofWT, i.e. corresponding to the reduction in expression level. However,the potency of the agonist AR231453 was also reduced, i.e. EC50 increased from 2.2 to 17 nM (Table 3).
	6x44	F234A	Inactivating	PubMed text miming	23135271	totally abolished the ligand-independent, constitutive activity of GPR119 as determined by cAMP measurements
	6x48	W238A	Inactivating	PubMed text miming	26526849, 19920139	no constitutive activity that could not be activated by the ligand
GPR39_HUMAN	6x44	L292A	Inactivating	PubMed text miming	23135271	reduced the cell surface expression and decreased the apparent constitutive signaling of GPR39
	6x44	L292F	Inactivating	PubMed text miming	23135271	reduced the cell surface expression and decreased the apparent constitutive signaling of GPR39
	6x44	L292Y	Inactivating	PubMed text miming	23135271	reduced the cell surface expression and decreased the apparent constitutive signaling of GPR39
	6x48	W296A	Inactivating	PubMed text miming	19920139	greatly reduced the surface expression
HRH1_HUMAN	3x40	I115A	Inactivating	PubMed text miming	21081645	abolishes the constitutive activity of the histamine H1 receptor (H1R), the effect of constitutive-activity increasing mutations, and the histamine-induced receptor activation.
	3x40	I115G	Inactivating	PubMed text miming	21081645	abolishes the constitutive activity of the histamine H1 receptor (H1R), the effect of constitutive-activity increasing mutations, and the histamine-induced receptor activation.
	6x40	I420A	Constitutively activating	PubMed text miming	17959710	increases the constitutive activity of the receptor
	6x40	I420E	Constitutively activating	PubMed text miming	17959710	highly active CAM H1Rs for which almost no additional histamine-induced receptor activation can be detected
	6x40	I420K	Constitutively activating	PubMed text miming	17959710	highly active CAM H1Rs for which almost no additional histamine-induced receptor activation can be detected
	6x40	I420R	Constitutively activating	PubMed text miming	17959710	highly active CAM H1Rs for which almost no additional histamine-induced receptor activation can be detected
	6x40	I420S	Constitutively activating	PubMed text miming	17959710	greatly increased the basal activation of NF-κB
	6x48	W428A	Inactivating	PubMed text miming	25013351	No specific binding of [3H]-mepyramine or [3H]-(2S, 4R)-PAT was detected
LSHR_HUMAN	2x50	D405N	Inactivating	GPCRdb	11696538	two other mutants of the hLHR (D405N and Y546F in transmembrane helices 2 and 5, respectively) that cause a more severe impairment in receptor activation (i.e. a 10–50-fold rightward shift in the EC50 for cAMP accumulation) become resistant to agonist-induced phosphorylation but still lengthen the t1⁄2 of internalization 5–7-fold (12).
	3x43	L457K	Constitutively activating	PubMed text miming	11376115	constitutive activation of cAMP production
	3x43	L457R	Constitutively activating	PubMed text miming	11376115	constitutive activation of cAMP production
	3x46	I460A	Inactivating	GPCRdb	17872379	reduced coupling efficiency
	3x50	R464A	Inactivating	GPCRdb	17872379	the EC50 values were appreciably increased
	6x37	M571I	Constitutively activating	Disease-associated	7757065	produced a 5-fold increase in cellular cAMP production when assayed in the absence of agonist
	6x41	I575L	Constitutively activating	Disease-associated	9849960	mimicked the activating effects of this mutation in the full length receptor
	6x44	D578E	Constitutively activating	GPCRdb, Disease-associated	8943222	cause a 5.1-fold stimulation in basal cAMP accumulation, an effect similar to that caused by the original Gly mutant (D578G).
	6x44	D578F	Constitutively activating	GPCRdb	8943222	This mutant receptor (D578F)was found to be just as strongly activated (7.6-fold increase in basal cAMP) as D578Y
	6x44	D578G	Constitutively activating	GPCRdb, Disease-associated	8943222	cause a 5.1-fold stimulation in basal cAMP accumulation, an effect similar to that caused by the original Gly mutant (D578G).
	6x44	D578H	Constitutively activating	GPCRdb, Disease-associated	20835841	increased the basal cAMP by 22-fold
	6x44	D578Y	Constitutively activating	GPCRdb, Disease-associated	8943222	This mutant receptor (D578F)was found to be just as strongly activated (7.6-fold increase in basal cAMP) as D578Y
	7x45	N615A	Inactivating	GPCRdb	20835841	In H7, signaling potency and efficacy are greatly diminished in the A, D and K replacements of N615(7.45); the same substitutions of N619(7.49) caused greatly reduced or loss of signaling.
	7x45	N615D	Inactivating	GPCRdb	20835841	In H7, signaling potency and efficacy are greatly diminished in the A, D and K replacements of N615(7.45); the same substitutions of N619(7.49) caused greatly reduced or loss of signaling.
	7x45	N615K	Inactivating	GPCRdb	20835841	In H7, signaling potency and efficacy are greatly diminished in the A, D and K replacements of N615(7.45); the same substitutions of N619(7.49) caused greatly reduced or loss of signaling.
	7x49	N619A	Inactivating	GPCRdb	20835841	significantly reduced expression, greatly diminished signaling potency and efficacy
	7x49	N619K	Inactivating	GPCRdb	20835841	greatly diminished signaling potency and efficacy
	7x53	Y623A	Inactivating	PubMed text miming	20835841	expressed poorly and is also devoid of signaling
MC4R_HUMAN	2x50	D90A	Inactivating	GPCRdb, Disease-associated	16820227	abolished AGRP inverse activity
	2x50	D90N	Inactivating	GPCRdb, Disease-associated	16820227	greatly increased the EC50
	3x40	I137T	Inactivating	Disease-associated	10078568, 16752916	statistically significant reduced potency only for one or more of the endogenous agonists
	3x49	D146N	Constitutively activating	GPCRdb, Disease-associated	20190196	The basal activities of H76R and D146N are 10- to 15-fold higher than the basal activity of WT MC4R
	6x40	L250Q	Constitutively activating	Disease-associated	10903341, 23791567	Gain of function, significantly increased pERK1/2 level upon stimulation
	6x41	I251L	Constitutively activating	Disease-associated	21976721	Gain of function, increased basal activity in vitro
	7x49	D298A	Inactivating	GPCRdb, Disease-associated	16820227	abolished AGRP inverse activity
	7x49	D298N	Inactivating	GPCRdb, Disease-associated	17376547, 19366786	greatly increased the EC50
	7x53	Y302F	Inactivating	Disease-associated	19214805	greatly increased the NDP-MSH-stimulated cAMP EC50
MSHR_HUMAN	7x49	D294H	Inactivating	Disease-associated	10403794	unable to stimulate cAMP production as strongly as the wild type receptor in response to alpha-melanocyte-stimulating hormone stimulation
NK1R_HUMAN	2x50	E78A	Inactivating	PubMed text miming	26269596	Ala substitution of GluII:10 (2.50) totally eliminated SP-induced Gq signaling (Fig. 3c)
	2x50	E78D	Inactivating	PubMed text miming	26269596	However, in respect to Gs signaling, the AspII:10 mutant, in contrast to the Ala substitution, displayed no significant constitutive activity in the cAMP assay and had a seriously impaired SP-induced cAMP response with a reduction in potency of at least 2 orders of magnitude and not reaching an Emax with the highest concentration tested (Fig. 6b).
	6x44	F257A	Inactivating	PubMed text miming	23135271	the substance P-induced signaling was abolished for this mutant form of NK1
	6x48	W261A	Inactivating	PubMed text miming	19920139	greatlt reduced the Emax in cAMP signaling
	7x53	Y305A	Inactivating	PubMed text miming	8999947	A Y305A mutant within the putative NPX2–3Y endocytic motif of the seventh transmembrane domain showed impaired signaling and was minimally expressed at the plasma membrane but was found in cytoplasmic vesicles.
	7x53	Y305F	Inactivating	PubMed text miming	8999947	a Y305F mutant signaled normally and was normally expressed at the plasma membrane but showed impaired internalization.
NK2R_HUMAN	2x50	D79A	Inactivating	PubMed text miming	10085227	the activation of the D79A and D79N mutants resulted in a greater-than-10-fold lower maximal current amplitude
	2x50	D79N	Inactivating	PubMed text miming	10085227	the activation of the D79A and D79N mutants resulted in a greater-than-10-fold lower maximal current amplitude
	7x49	N303A	Inactivating	PubMed text miming	10085227	greater than 10-fold decreases in the maximal current amplitude
	7x49	N303S	Inactivating	PubMed text miming	10085227	greater than 10-fold decreases in the maximal current amplitude
NTR1_HUMAN	2x50	N113A (NTR1_RAT)	Inactivating	PubMed text miming	9927610	In contrast, replacement of Asp113 by Ala residue in NTR1 strongly decreases its ability to activate inositol turnover, indicating that the functionally active conformation of NTR1 is maintained by interaction of sodium ions with aspartate 113.
	6x40	V308E	Constitutively activating	PubMed text miming	27466951	The basal signaling activity was increased approximately 5-fold over wild type basal activity
OPSD_HUMAN	3x40	L125W	Inactivating	PubMed text miming	11722553	Activation rates were reduced by 15%
	3x40	L125Y	Inactivating	PubMed text miming	11722553	Activation rates were reduced by 50%
	3x49	E134Q	Constitutively activating	PubMed text miming	12601165	rescues activity in 9-demethyl-retinal-reconstituted mutants to different degrees, depending on the position of the Ala replacement in the NPxxY(x)5,6F motif
	3x50	R135A	Inactivating	PubMed text miming	9538004	reduced rates of transducin activation compared to wild-type rhodopsin and elevated levels of phosphorylation by rhodopsin kinase
	3x50	R135W	Inactivating	Disease-associated	1862076	The bovine p.R135W rhodopsin mutant was unable to activate the G protein in vitro, contrary to the wild-type rhodopsin
	6x40	M257A OPSD_BOVIN)	Constitutively activating	PubMed text miming	8943296	only M257A displayed more than 10% constitutive activity.
	6x40	M257Y	Constitutively activating	PubMed text miming	15306683	constitutively activates opsin but does not disrupt the salt bridge
	6x44	F261A	Constitutively activating	PubMed text miming	9287308	that loss-of-function phenotypes of the Gly121 mutants could at least partially be restored by replacing Phe261 by alanine as a second-site mutation
	6x44	F261T	Constitutively activating	PubMed text miming	9287308	exhibited intermediate effects (suppressed the dark activity of G121L)
	6x44	F261V	Constitutively activating	PubMed text miming	9287308	exhibited intermediate effects (suppressed the dark activity of G121L)
	7x49	N302A	Inactivating	PubMed text miming	12601165	the light-induced activity was modestly reduced for N302A
	7x53	Y306A	Inactivating	PubMed text miming	12601165	greatly reduced the Spectra of purified recombinant pigments and Gt-activation rates
OXYR_HUMAN	2x50	D85A	Inactivating	PubMed text miming	10385703	mutation of the aspartic acid located in the second transmembrane domain led to an inactive receptor (D85A)
	3x49	D136A	Inactivating	PubMed text miming	10385703	completely unresponsive when assayed for InsP production upon stimulation with high doses of OT and AVP
	3x49	D136Q	Inactivating	PubMed text miming	10385703	completely unresponsive when assayed for InsP production upon stimulation with high doses of OT and AVP
	3x49	D136N	Constitutively activating	PubMed text miming	16042376	increased the rate of both basal and agonist-stimulated inositol phosphate (IP3) accumulation of the receptor
	3x50	R137A	Constitutively activating	PubMed text miming	10385703	induced a significant increase in the basal production of total InsP
	6x44	F284A	Inactivating	PubMed text miming	8955347	No binding, no signaling
PTAFR_HUMAN	7x49	D289A	Inactivating	PubMed text miming	9261140	abolished both internalization and G-protein coupling
	7x53	Y293A	Inactivating	PubMed text miming	9261140	abolished coupling but not internalization
RXFP2_HUMAN	6x44	D637Y	Constitutively activating	PubMed text miming	11809971, 25761609	increased cAMP accumulation in a ligand-independent manner
S1PR1_HUMAN	3x43	L135E	Inactivating	PubMed text miming	17114791	increased the EC50 and reduced the Emax
	3x43	L135G	Inactivating	PubMed text miming	17114791	increased the EC50 and reduced the Emax
	6x40	V261A	Inactivating	PubMed text miming	17114791	increased the EC50 and reduced the Emax
	6x40	V261L	Inactivating	PubMed text miming	17114791	maintained wild type [32P]S1P binding with abolished ligand-dependent activation by S1P
	6x40	V261T	Inactivating	PubMed text miming	17114791	greatly increased the EC50 and reduced the Emax
	6x44	F265G	Inactivating	PubMed text miming	17114791	maintained wild type [32P]S1P binding with abolished ligand-dependent activation by S1P
	6x48	W269A	Inactivating	PubMed text miming	17114791	Moreover, amino acid replacements to Trp-6.48 had little effect on the EC50 but had rather substantive effects on the Emax, indicating a role for this residue in the transition from the fully inactive to fully active conformation of S1P1
TSHR_HUMAN	2x50	D460A	Inactivating	GPCRdb	15722344	D2.50A and D2.50N show a loss in basal activity
	2x50	D460N	Inactivating	GPCRdb	15722344	D2.50N construct shows higher EC50 and lower Emax values than WT receptor
	3x40	V509A	Constitutively activating	Disease-associated	11022192	Basal cAMP levels in V509A transfectant were higher than that in the WT transfectant
	3x43	L512Q	Constitutively activating	GPCRdb, Disease-associated	16960398	increase basal cAMP production in vitro
	3x43	L512R	Constitutively activating	GPCRdb, Disease-associated	11022192	3.3-fold increase in basal cAMP level
	3x46	I515M	Inactivating	PubMed text miming	16339276	Fully Restore the Constitutive Activity of M626I to the Level of wt TSHR
	3x49	E518A	Constitutively activating	GPCRdb	12062436	display increased constitutive activity
	3x49	E518Q	Constitutively activating	GPCRdb	12062436	display increased constitutive activity
	6x37	M626I	Constitutively activating	Disease-associated	16339276	The specific constitutive activity of M626I, measured by its basal cAMP generation corrected for cell surface expression, was 13-fold higher than that of wild-type TSHR
	6x40	L629F	Constitutively activating	GPCRdb, Disease-associated	9398746	resulted in 3.5- to 4-fold higher basal values of cAMP accumulation compared to the wildtype receptor.
	6x41	I630L	Constitutively activating	GPCRdb, Disease-associated	11012571	showed increased basal cAMP accumulation compared to the wt TSHR
	6x41	I630M	Constitutively activating	GPCRdb, Disease-associated	15876166	display an increase in constitutive stimulation of basal cyclic adenosine monophosphate (cAMP) levels compared to the wild-type receptor.
	6x44	D633A	Constitutively activating	GPCRdb, Disease-associated	9253356, 27921237	increased the cAMP by 13.6-fold when compared with the WT
	6x44	D633C	Constitutively activating	GPCRdb	11463854	constitutive activation of the TSH receptor
	6x44	D633F	Constitutively activating	GPCRdb	11463854	constitutive activation of the TSH receptor
	6x44	D633H	Constitutively activating	GPCRdb, Disease-associated	17293446	immunization with active receptor conformations, especially with D633H mutant, generated higher prevalence of stimulating sera with higher median TSAB levels
	6x44	D633Y	Constitutively activating	GPCRdb, Disease-associated	11463854	constitutive activation of the TSH receptor
	6x48	M637C	Constitutively activating	PubMed text miming	20179143	increased the basal cAMP accumulation
	6x48	M637W	Constitutively activating	PubMed text miming	20179143	increased the basal cAMP accumulation
	7x45	N670S	Constitutively activating	GPCRdb, Disease-associated	11463854	The TSHR substitution N670S resulted in constitutive activation as previously described (30).
	7x45	N670A	Inactivating	GPCRdb	11463854	greatly reduced the stimulated cAMP accumulation
	7x49	N674A	Inactivating	GPCRdb	11463854	reduced the basal cAMP accumulation
	7x49	N674D	Constitutively activating	GPCRdb	18989620, 15722344	Constitutive activity in cAMP accumulation
	7x49	N674S	Constitutively activating	GPCRdb	11463854	increased the basal cAMP accumulation
	7x53	Y678A	Inactivating	PubMed text miming	21153243	does not impair high affinity TSH binding, but completely abolishes the ability of cAMP response upon TSH stimulation. It also significantly reduces TSH internalization
V2R_HUMAN	2x50	D85N	Inactivating	Disease-associated	26600853	Although D85N is expressed normally on the cell surface, binding to arginine vasopressin was lowered by 6-folds, which together with a 20-fold decrease in coupling efficiency, resulted in a 50-fold increase in EC50
	3x40	S127F	Inactivating	Disease-associated	10820168, DOI:10.1530/endoabs.49.EP804	was not able to increase the intracellular cAMP levels in response to vasopressin stimulation.
	3x43	I130F	Inactivating	Disease-associated	16006591, 10770218	reduced maximum agonist-induced cAMP responses as a result of an improper cell surface targeting.
	3x43	I130N	Constitutively activating	Disease-associated	26131744	resulted in constitutive activity of the V2R with constitutive cyclic adenosine monophosphate (cAMP) generation in HEK293 cells
	3x46	M133A	Inactivating	PubMed text miming	27525504	The G protein response was significantly reduced for all mutants, pointing towards a reduced receptor activity.
	3x49	D136A	Constitutively activating	PubMed text miming	9891993	agonist-independent activation of this mutant V2 receptor
	3x50	R137C	Constitutively activating	Disease-associated	15872203	basal levels of cAMP production in cells expressing V2R with the R137C mutation were four times the levels in cells expressing wild-type V2R (P=0.01)
	3x50	R137H	Inactivating	Disease-associated	11134505	Loss of function, constitutive arrestin-mediated desensitization
	3x50	R137L	Constitutively activating	Disease-associated	15872203	cells expressing the R137L mutant had 7.5 times the level of activity of cells expressing wildtype V2R (P<0.004)
	6x37	T273A	Inactivating	PubMed text miming	27525504	The G protein response was significantly reduced for all mutants, pointing towards a reduced receptor activity.
	6x37	T273M	Inactivating	Disease-associated	27601473	reduced the basal cAMP and Emax
	6x41	V277A	Inactivating	Disease-associated	7987330, 9027323	functionally less active as seen by a substantially decreased receptor number (Bmax) and reduced cAMP stimulation by dDAVP
	6x44	Y280C	Inactivating	Disease-associated	7987330, 9027323	show substantially decreased cell surface expression and are functionally inactive
	7x49	N321K	Inactivating	Disease-associated	10820168, F2444628417	The N321K mutant V2R showed normal cell surface expression, but the potency of arginine vasopressin for cAMP generation was low, whereas the clinically used desmopressin was not efficient.
	7x49	N321Y	Inactivating	Disease-associated	9853256	Six of the NDI alleles (N321Y, R113W, L81F, P95L, N317K, and R181C/V215M) showed partial or complete responses at AVP concentrations from 1.5 logs to four logs higher than required for the wild-type
	7x53	Y325A	Inactivating	PubMed text miming	27525504	The G protein response was significantly reduced for all mutants, pointing towards a reduced receptor activity.
